# Supplementary material for: Magnetic alignment enhances homing efficiency of hunting dogs
Source: eLife. 2020 Jun 16;9:e55080. doi: 10.7554/eLife.55080 (PMC7297537; doi:10.7554/eLife.55080)
Supplement: Source data 1. [file elife-55080-data1.xlsx]

## Sheet: Scouting
Return strategy (scouting_SR= second return)	Track ID	Dog	ID	Age (years)	Day	Month	Year	Locality	Familiarity with the area	Game following	Game species	Dog was calling	Starting time	Duration	Total lenght (m)	Using forest path	Lenght outbound(m)	Duration outbound (sec)	Lenght turning trajectory (m)	Duration turning trajectory (sec)	Lenght inbound (m)	Duration inbound (sec)	Speed of turning point (km/h)	Speed after turning point (km/h)	Azimuth before compass run (°)	Azimut A (°)	Azimuth B (°)	Azimuth C (Compass run) (°)	Length of compass run (m)	Inbound speed (km/h)	Inbound track lenght (m)	Beeline from turning point to goal (m)	Wind direction (°)	Wind speed (km/h)	Sun azimuth (°)	Temperature (°C)
scouting	2	Bessy	Bessy2	6	17	1	2016	Hnevkov	familiar	yes	roe deer	yes	14:27:11	00:15:10	1824	yes	920	295	171	90	732	230	0.5	8	69	322	239	139	11	10.4	618	421	315	1	206	-2.7
scouting	3	Bessy	Bessy3	6	21	7	2016	Stupno	unknown	yes	roe deer	no	09:07:02	00:05:41	722	yes	365	151	73	62	284	128	0.5	2.1	3	72	261	335	2	5.2	62	47	90	4	97	24.3
scouting_SR	3	Bessy	Bessy3	6	21	7	2016	Stupno	unknown	yes	roe deer	no	09:07:02	n.m.	n.m.	no	n.m.	n.m.	n.m.	n.m.	n.m.	n.m.	5	12	359	72	211	336	3	6.8	87	64	90	4	97	24.3
scouting	9	Bessy	Bessy9	7	8	3	2017	Stupno	unknown	yes	unknown	yes	15:01:02	00:04:25	666	yes	270	115	62	35	334	115	2.4	5	75	298	108	141	13	7.8	65	57	225	21	229	6
scouting	18	Gofi	Gofi18	2	2	8	2016	Stupno	unknown	no	n.a.	n.a.	14:40:12	00:04:05	677	yes	316	110	74	40	287	95	5	9	326	48	164	195	9	9.8	337	221	180	4	201	20
scouting	28	Gofi	Gofi28	2	14	8	2016	Hnevkov	unknown	yes	unknown	yes	10:24:12	00:03:50	461	no	375	190	40	25	45	15	3.2	7	119	174	107	151	16	7.8	112	104	calm	0	117	17
scouting	33	Gofi	Gofi33	2	23	9	2016	Prostredni_vrch	unknown	yes	hare	yes	09:32:52	00:01:50	341	no	168	50	40	20	133	40	2.8	7	224	237	95	9	2	11.2	172	137	calm	0	113	9
scouting_SR	44	Gofi	Gofi44	2	3	1	2017	Svarovska_lipa	unknown	yes	unknown	yes	14:02:41	n.m.	n.m.	yes	n.m.	n.m.	n.m.	n.m.	n.m.	n.m.	6	10	52	214	45	166	8	13.9	386	327	270	27	206	0.7
scouting	45	Gofi	Gofi45	2	3	1	2017	Svarovska_lipa	unknown	yes	unknown	no	14:19:41	00:04:20	1010	yes	600	160	108	30	301	70	7	12	79	138	146	84	4	15.3	366	228	270	27	206	0.7
scouting	47	Gofi	Gofi47	2	12	2	2017	Prostredni_vrch	familiar	yes	unknown	yes	12:53:36	00:04:35	1014	yes	414	85	98	45	503	145	1.4	13	264	286	55	342	31	12.5	160	127	90	8	176	0.8
scouting	48	Gofi	Gofi48	2	12	2	2017	Prostredni_vrch	familiar	yes	roe deer	yes	12:59:56	00:03:00	695	no	363	85	76	25	256	70	3.3	5	85	267	85	11	14	13.2	271	179	90	8	176	0.8
scouting	49	Gofi	Gofi49	2	12	2	2017	Prostredni_vrch	familiar	yes	roe deer	yes	13:03:01	00:03:15	663	no	218	45	64	25	380	125	4	10	273	337	124	122	13	10.9	382	176	135	9	192	0.9
scouting	50	Gofi	Gofi50	2	12	2	2017	Prostredni_vrch	familiar	no	n.a.	n.a.	13:07:16	00:02:40	474	yes	234	80	39	15	200	65	6	11	308	227	26	13	9	11.1	200	155	135	9	192	0.9
scouting	57	Gofi	Gofi57	2	8	3	2017	Stupno	familiar	no	n.a.	n.a.	16:12:20	00:02:40	445	yes	173	85	46	20	224	55	6	9	183	115	359	12	28	14.7	204	118	225	16	242	6
scouting	4	Hard	Hard4	1	12	2	2017	Prostredni_vrch	unknown	yes	roe deer	yes	12:52:35	00:02:40	539	no	315	83	57	25	166	52	2.6	8	360	278	118	166	24	7.1	51	49	90	8	176	0.8
scouting_SR	4	Hard	Hard4	1	12	2	2017	Prostredni_vrch	unknown	yes	roe deer	yes	12:52:35	n.m.	n.m.	no	n.m.	n.m.	n.m.	n.m.	n.m.	n.m.	7	8	245	278	128	175	9	12.4	92	89	90	8	176	0.8
scouting	6	Hard	Hard6	1	12	2	2017	Prostredni_vrch	unknown	no	n.a.	n.a.	13:07:23	00:06:17	900	no	268	82	92	25	541	270	6	10	235	246	12	262	11	7.7	621	171	135	9	192	0.9
scouting	15	Hard	Hard15	1	5	3	2017	Ryman	unknown	yes	roe deer	yes	14:02:23	00:04:39	1276	no	378	74	130	32	767	173	6	20	132	206	32	340	30	15.4	126	55	225	11	213	11
scouting	10	Amalka	Amalka10	2	25	1	2015	Ryman	unknown	yes	unknown	yes	16:34:10	00:13:10	1168	no	818	565	125	95	225	130	1.7	5	67	253	133	161	26	5	128	109	calm	0	232	2
scouting	13	Amalka	Amalka13	3	16	2	2015	Prostredni_vrch	unknown	yes	hare	yes	17:00:25	00:02:10	283	no	113	55	29	15	143	60	3.7	9	66	354	208	177	32	8.5	115	108	calm	0	247	8
scouting	34	Amalka	Amalka34	4	12	9	2016	Prostredni_vrch	familiar	no	n.a.	n.a.	08:51:12	00:03:15	364	no	149	105	38	23	178	67	1.9	7	105	49	229	210	11	9.1	198	109	calm	0	100	21
scouting	2	Figy	Figy2	2	8	9	2015	Ryman	unknown	no	n.a.	n.a.	08:18:25	00:02:55	273	no	134	115	33	15	106	45	5	7	56	253	17	357	7	8.3	116	96	270	12	100	10
scouting_SR	8	Figy	Figy8	3	22	9	2015	Prostredni_vrch	unknown	no	n.a.	n.a.	10:15:09	n.m.	n.m.	yes	n.m.	n.m.	n.m.	n.m.	n.m.	n.m.	5	3.2	141	168	326	14	11	6.9	129	122	180	9	126	14
scouting	18	Figy	Figy18	3	10	11	2015	Prostredni_vrch	familiar	yes	unknown	no	10:18:43	00:03:40	407	no	213	117	39	23	155	80	2.9	9	60	299	266	357	2	6.9	184	131	225	6	153	15
scouting	21	Figy	Figy21	3	15	11	2015	Svarovska_lipa	unknown	no	n.a.	n.a.	11:23:22	00:13:35	1866	no	919	438	193	97	755	280	4.3	5	173	87	25	172	20	9.1	906	644	315	12	168	8
scouting	3	Hurvinek	Hurvinek3	4	25	12	2014	Prostredni_vrch	unknown	yes	roe deer	no	14:49:05	00:06:15	806	no	509	255	71	45	225	75	0.9	3.1	28	257	63	9	7	10.2	279	202	calm	0	209	4.5
scouting	4	Hurvinek	Hurvinek4	4	25	12	2014	Prostredni_vrch	unknown	yes	roe deer	no	14:55:35	00:07:20	929	no	557	260	94	50	278	130	3.2	8	34	264	78	140	4	7.8	304	274	calm	0	209	4.5
scouting	11	Hurvinek	Hurvinek11	4	20	1	2015	Prostredni_vrch	familiar	yes	roe deer	no	14:36:50	00:09:00	1289	no	879	345	131	65	280	130	3.5	5	226	302	54	182	10	7.7	302	132	calm	0	206	1.5
scouting	12	Hurvinek	Hurvinek12	4	20	1	2015	Prostredni_vrch	familiar	yes	roe deer	no	14:47:30	00:05:40	739	no	534	225	64	40	140	75	3.9	8	200	294	58	5	16	6.7	37	34	calm	0	206	1.5
scouting	13	Hurvinek	Hurvinek13	4	20	1	2015	Prostredni_vrch	unknown	no	n.a.	n.a.	15:08:15	00:07:05	809	no	272	130	75	50	463	245	2.6	7	145	52	306	168	7	6.7	431	217	calm	0	219	1.5
scouting	16	Hurvinek	Hurvinek16	5	24	1	2015	Prostredni_vrch	familiar	yes	roe deer	yes	14:27:50	00:12:55	1356	no	853	515	135	70	368	185	3	5	280	119	36	83	94	7.3	400	240	calm	0	206	0.5
scouting	17	Hurvinek	Hurvinek17	5	8	2	2015	Prostredni_vrch	familiar	yes	roe deer	no	12:55:55	00:05:45	874	yes	420	175	81	45	371	125	1.9	8	289	248	98	78	71	10.4	327	234	calm	0	176	3.5
scouting	18	Hurvinek	Hurvinek18	5	8	2	2015	Prostredni_vrch	familiar	yes	boar	no	13:05:55	00:03:00	541	yes	225	80	46	20	271	80	4.5	11	330	305	99	27	6	12.1	270	189	calm	0	192	3.5
scouting	28	Hurvinek	Hurvinek28	5	2	9	2015	Prostredni_vrch	familiar	no	n.a.	n.a.	07:55:14	00:07:15	1023	yes	396	200	101	65	526	170	1.4	1.9	233	168	339	121	6	10.9	483	244	315	8	88	14.6
scouting	31	Hurvinek	Hurvinek31	5	8	9	2015	Ryman	unknown	no	n.a.	n.a.	08:33:14	00:05:10	581	no	229	115	57	40	298	155	2.1	5	305	260	29	357	5	6.7	342	141	270	12	100	10.2
scouting	37	Hurvinek	Hurvinek37	5	15	9	2015	Prostredni_vrch	familiar	yes	roe deer	no	16:12:39	00:02:05	368	no	171	65	47	20	150	40	7	10	199	20	221	201	16	13.5	165	161	180	10	235	20.2
scouting_SR	41	Hurvinek	Hurvinek41	5	16	9	2015	Prostredni_vrch	familiar	yes	roe deer	no	10:28:49	n.m.	n.m.	no	n.m.	n.m.	n.m.	n.m.	n.m.	n.m.	3.5	4.5	80	202	87	166	55	6.9	118	89	135	13	126	18.2
scouting	46	Hurvinek	Hurvinek46	5	31	12	2015	Prostredni_vrch	familiar	no	n.a.	n.a.	15:42:25	00:01:27	253	no	119	42	27	8	105	37	9	17	317	177	35	5	26	10.2	86	76	180	1	221	-1.3
scouting	47	Hurvinek	Hurvinek47	5	31	12	2015	Prostredni_vrch	familiar	no	n.a.	n.a.	15:46:12	00:04:28	675	no	391	148	69	32	215	88	3.8	3.7	289	59	104	37	22	8.6	251	153	180	1	221	-1.3
scouting	50	Hurvinek	Hurvinek50	5	31	12	2015	Prostredni_vrch	familiar	no	n.a.	n.a.	16:09:05	00:02:47	356	yes	106	55	34	25	215	87	1.8	8	177	145	272	267	9	8.3	228	135	135	6	233	-1.5
scouting	52	Hurvinek	Hurvinek52	6	5	4	2016	Svarovska_lipa	familiar	no	n.a.	n.a.	10:09:25	00:05:52	890	yes	359	162	91	33	439	157	2.9	6	322	357	102	165	6	10.7	173	152	calm	0	121	6.3
scouting_SR	52	Hurvinek	Hurvinek52	6	5	4	2016	Svarovska_lipa	familiar	no	n.a.	n.a.	10:09:25	n.m.	n.m.	yes	n.m.	n.m.	n.m.	n.m.	n.m.	n.m.	1.5	5	106	357	113	153	2	9.8	71	53	calm	0	121	6.3
scouting	54	Hurvinek	Hurvinek54	6	4	8	2016	Brezina	unknown	no	n.a.	n.a.	09:55:45	00:02:12	253	no	123	70	24	24	107	38	0.3	1.7	198	190	8	15	4	9.1	118	101	calm	0	103	27
scouting	56	Hurvinek	Hurvinek56	6	23	9	2016	Prostredni_vrch	familiar	yes	hare	no	08:39:50	00:02:35	408	no	204	72	39	25	164	58	3.1	6	304	210	61	4	5	9	198	156	180	3	100	11.5
scouting	58	Hurvinek	Hurvinek58	7	14	2	2017	Prostredni_vrch	familiar	yes	hare	yes	15:23:40	00:06:58	918	no	547	243	92	50	279	125	3.3	5	184	267	114	165	9	7.7	346	170	0	8	222	5
scouting	61	Hurvinek	Hurvinek61	7	17	2	2017	Stupno	unknown	yes	unknown	yes	14:17:48	00:05:15	687	yes	410	150	67	42	209	123	1.3	5	291	160	77	151	7	6.1	269	160	225	21	208	6
scouting_SR	62	Hurvinek	Hurvinek62	7	4	3	2017	Brezina	unknown	yes	roe deer	no	09:53:40	n.m.	n.m.	no	n.m.	n.m.	n.m.	n.m.	n.m.	n.m.	5	5	30	177	326	14	33	9.4	161	127	calm	0	126	4
scouting	5	Kacka	Kacka5	2	7	3	2015	Prostredni_vrch	unknown	yes	roe deer	yes	17:28:05	00:10:45	1229	yes	615	310	124	90	489	245	1.4	6	62	282	338	169	28	7	491	261	calm	0	255	10.9
scouting	13	Kacka	Kacka13	3	27	9	2015	Ptice_vysilac	unknown	yes	roe deer	yes	17:31:33	00:03:09	534	yes	272	111	48	18	213	60	5	12	291	250	45	15	4	12.8	235	216	0	14	249	13
scouting	18	Kacka	Kacka18	3	6	10	2015	Svarovska_lipa	unknown	yes	roe deer	yes	10:24:14	00:13:50	1570	yes	782	415	162	100	626	315	3.4	3.8	253	54	151	179	31	9.7	388	226	90	4	135	12
scouting	19	Kacka	Kacka19	3	10	11	2015	Prostredni_vrch	familiar	no	n.a.	n.a.	09:54:20	00:04:27	596	no	351	145	64	35	182	87	3.4	13	229	73	22	355	49	7.6	117	99	315	8	140	14
scouting	20	Kacka	Kacka20	3	10	11	2015	Prostredni_vrch	familiar	yes	unknown	no	10:18:40	00:02:07	266	no	182	95	28	17	56	15	3.4	9	267	49	264	210	3	8.9	116	97	315	8	153	14
scouting	24	Kacka	Kacka24	3	27	11	2015	Svarovska_lipa	unknown	no	n.a.	n.a.	10:26:10	00:05:05	756	yes	385	150	75	57	295	98	0	2.8	229	115	318	68	7	10.1	315	237	315	3	153	3
scouting	28	Kacka	Kacka28	3	29	11	2015	Krystofovy_hamry	unknown	yes	unknown	yes	11:50:25	00:06:27	507	yes	255	217	50	53	202	117	0	2.9	178	240	353	340	8	5.6	181	116	225	22	168	0
scouting	29	Kacka	Kacka29	3	29	11	2015	Krystofovy_hamry	unknown	no	n.a.	n.a.	11:56:55	00:02:42	328	yes	226	125	35	20	67	17	3.4	13	246	285	107	182	14	9.6	114	103	225	22	168	0
scouting	41	Kacka	Kacka41	4	15	1	2017	Prostredni_vrch	familiar	yes	roe deer	yes	13:11:45	00:07:13	837	no	555	280	93	68	275	137	1.3	7	15	229	155	178	28	6.2	279	228	270	24	192	1
scouting	11	Pecka	Pecka11	2	11	2	2017	Prostredni_vrch	unknown	yes	roe deer	yes	14:52:18	00:03:57	508	yes	357	165	54	32	97	40	3.3	5	303	115	24	288	6	8.9	101	94	135	6	208	0
scouting	14	Pecka	Pecka14	2	9	3	2017	Ryman	unknown	yes	hare	yes	11:07:43	00:02:27	339	no	135	52	34	20	170	75	3.5	6	216	305	110	303	2	8.1	183	113	270	11	158	9
scouting	16	Pecka	Pecka16	2	9	3	2017	Ryman	unknown	yes	roe deer	yes	11:28:43	00:06:20	821	no	500	232	80	43	241	105	4	7	340	105	312	150	6	7.3	163	157	270	15	158	10
scouting	17	Pecka	Pecka17	2	9	3	2017	Ryman	unknown	yes	roe deer	yes	11:53:15	00:08:45	1030	no	619	313	104	55	306	157	4.5	7	301	159	52	359	10	6.9	217	163	270	15	158	10
scouting_SR	18	Pecka	Pecka18	2	9	3	2017	Ryman	unknown	yes	unknown	yes	12:16:38	n.m.	n.m.	no	n.m.	n.m.	n.m.	n.m.	n.m.	n.m.	2.1	5	226	325	201	311	12	6	156	139	270	14	176	10
scouting	3	Punta	Punta3	1	31	12	2015	Prostredni_vrch	familiar	no	n.a.	n.a.	16:09:05	00:05:12	709	yes	141	80	71	62	496	170	0	9	125	145	307	298	29	10	492	113	135	6	233	-1.5
scouting_SR	6	Punta	Punta6	2	21	7	2016	Brezina	unknown	yes	roe deer	yes	09:17:40	n.m.	n.m.	no	n.m.	n.m.	n.m.	n.m.	n.m.	n.m.	0.3	1	156	177	23	171	4	7	142	87	90	4	97	24
scouting_SR	17	Punta	Punta17	2	3	1	2017	Svarovska_lipa	unknown	yes	unknown	yes	14:19:50	n.m.	n.m.	yes	n.m.	n.m.	n.m.	n.m.	n.m.	n.m.	3	3.1	14	210	20	12	5	12.1	90	85	270	27	206	1
scouting	23	Punta	Punta23	2	1	3	2017	Stupno	unknown	yes	roe deer	yes	15:53:25	00:05:28	753	no	379	155	74	40	300	133	2.7	3	333	340	87	180	13	7.9	99	73	225	37	229	6.6
scouting	24	Punta	Punta24	2	1	3	2017	Stupno	unknown	yes	hare	yes	16:45:25	00:02:43	404	no	243	118	38	17	124	28	2.6	6	24	168	279	219	2	14.2	148	136	225	18	242	6
scouting	26	Punta	Punta26	2	1	3	2017	Stupno	unknown	yes	roe deer	yes	17:17:10	00:02:03	267	no	157	73	24	15	84	35	2.9	10	15	210	332	83	11	8.4	96	67	225	29	255	6
scouting	27	Punta	Punta27	2	8	3	2017	Stupno	familiar	yes	roe deer	yes	15:01:38	00:04:35	712	yes	286	117	77	20	350	138	1.8	8	214	267	63	355	73	9.1	288	240	225	21	229	6
scouting	4	Terezka	Terezka4	1	25	12	2015	Prostredni_vrch	unknown	no	n.a.	n.a.	15:23:55	00:05:35	555	no	331	207	56	38	186	90	0	4.3	246	159	51	12	5	6.1	174	121	225	4	221	11
scouting	30	Terezka	Terezka30	2	21	7	2016	Brezina	unknown	yes	roe deer	no	09:35:54	00:09:56	760	no	305	278	75	95	379	223	1	5	172	249	1	11	20	6	369	137	135	4	97	24
scouting	33	Terezka	Terezka33	2	21	7	2016	Brezina	unknown	no	n.a.	n.a.	10:27:20	00:05:30	398	yes	121	129	39	46	240	155	0.7	1	143	185	320	94	5	5.5	237	160	135	5	110	23
scouting	47	Terezka	Terezka47	2	19	9	2016	Prostredni_vrch	unknown	yes	hare	yes	09:28:05	00:09:32	1319	no	1058	452	134	75	127	45	3.1	4.5	163	229	70	171	2	9.2	185	167	315	14	113	12
scouting	48	Terezka	Terezka48	2	19	9	2016	Prostredni_vrch	unknown	yes	roe deer	yes	09:38:20	00:06:20	749	no	445	225	75	50	229	105	2.3	7	135	229	64	347	9	7.5	229	178	0	14	113	12
scouting	52	Terezka	Terezka52	2	19	9	2016	Prostredni_vrch	unknown	no	n.a.	n.a.	10:14:10	00:02:20	286	yes	82	55	27	20	177	65	3.1	6	240	229	66	11	6	9.2	157	90	315	8	126	12
scouting	53	Terezka	Terezka53	2	17	2	2017	Stupno	unknown	no	n.a.	n.a.	14:08:38	00:02:47	436	yes	256	112	38	18	143	37	3.9	5	53	154	328	66	2	13.8	161	160	225	21	208	6
scouting	8	Benda	Benda8	1	16	2	2017	Ryman	unknown	yes	roe deer	yes	10:11:48	00:11:02	1520	no	756	357	152	65	612	240	0	5	267	145	32	30	3	9.8	311	273	225	2	144	5
scouting	9	Benda	Benda9	1	16	2	2017	Ryman	unknown	yes	hare	yes	10:30:03	00:06:10	838	yes	416	187	86	45	338	138	2.9	9	339	289	113	350	15	8.8	126	104	270	8	144	5
scouting	20	Benda	Benda20	1	5	3	2017	Ryman	unknown	yes	roe deer	no	15:00:18	00:04:30	563	yes	338	165	54	32	172	73	0.7	5	249	87	343	11	12	8.1	180	141	180	13	229	10
scouting	1	Vendulka	Vendulka1	8	11	10	2014	Svarovska_lipa	unknown	yes	boar	yes	13:07:20	00:08:25	531	yes	226	330	46	35	260	140	0	5	326	136	2	132	11	6.4	263	99	calm	0	183	16
scouting	5	Vendulka	Vendulka5	10	19	7	2016	Brezina	unknown	no	n.a.	n.a.	12:19:57	00:04:04	393	no	236	162	41	19	116	63	3.6	10	320	82	136	179	38	7	107	80	0	7	149	27
scouting	6	Vendulka	Vendulka6	10	2	8	2016	Brezina	unknown	no	n.a.	n.a.	14:27:38	00:03:17	336	no	238	142	31	18	68	37	2.8	8	133	30	175	191	24	6.7	75	63	180	4	201	20
scouting	7	Vendulka	Vendulka7	10	2	8	2016	Brezina	unknown	yes	hare	yes	14:38:43	00:04:55	597	yes	361	202	60	33	186	60	2	8	180	160	163	321	8	10.1	204	191	180	4	201	20
scouting	24	Vendulka	Vendulka24	10	9	3	2017	Ryman	unknown	yes	hare	yes	11:53:08	00:02:17	337	no	162	62	39	23	136	52	2.4	5	350	159	286	230	8	8.6	148	113	270	14	158	10
scouting	4	Dona	Dona4	4	27	9	2016	Pankovo_pole	unknown	yes	unknown	yes	10:26:09	00:02:50	592	no	352	95	61	15	177	60	7	8	125	119	300	206	4	10.6	181	144	calm	0	126	6
scouting	5	Dona	Dona5	4	27	9	2016	Pankovo_pole	unknown	yes	unknown	yes	10:46:04	00:03:10	544	no	217	95	58	30	270	65	2.5	10	210	211	82	40	120	14.7	188	103	calm	0	126	6
scouting	6	Dona	Dona6	4	7	10	2016	Dlouhy_les	familiar	yes	unknown	yes	14:37:59	00:01:40	349	no	127	50	44	10	153	40	7	8	347	336	169	333	4	14.3	192	108	calm	0	200	9
scouting	7	Dona	Dona7	4	7	10	2016	Dlouhy_les	familiar	yes	unknown	yes	14:39:39	00:03:45	941	no	835	195	106	30	0	0	2.7	9	125	319	78	94	30	12.7	76	71	calm	0	200	9
scouting	8	Dona	Dona8	4	7	10	2016	Dlouhy_les	familiar	yes	unknown	yes	14:50:44	00:03:10	717	no	422	95	69	15	223	65	11	15	155	125	3	127	6	12.8	260	224	calm	0	200	9
scouting	10	Dona	Dona10	4	7	10	2016	Dlouhy_les	familiar	yes	boar	yes	15:10:49	00:05:10	1300	no	666	160	147	70	467	110	0.9	1.6	316	311	218	190	12	13.6	515	349	calm	0	216	9
scouting	12	Dona	Dona12	4	23	10	2016	Pankovo_pole	familiar	yes	unknown	yes	14:30:59	00:04:00	1200	no	738	165	117	20	348	55	19	20	303	54	204	353	20	23	419	391	calm	0	200	11
scouting	13	Dona	Dona13	4	23	10	2016	Pankovo_pole	familiar	yes	unknown	yes	14:38:59	00:05:20	999	no	590	190	112	40	299	90	1.2	6	202	200	330	350	122	11.8	256	140	calm	0	200	11
scouting	14	Dona	Dona14	4	23	10	2016	Pankovo_pole	familiar	yes	unknown	yes	14:49:09	00:11:00	1800	no	1448	485	181	210	153	65	3.6	11	87	128	281	330	16	6.6	180	152	calm	0	200	11
scouting_SR	15	Dona	Dona15	4	23	10	2016	Pankovo_pole	familiar	yes	unknown	yes	15:02:39	n.m.	n.m.	no	n.m.	n.m.	n.m.	n.m.	n.m.	n.m.	14	19	6	248	45	350	73	17.8	335	277	calm	0	216	11
scouting	17	Dona	Dona17	4	27	1	2017	Dlouhy_les	unknown	no	n.a.	n.a.	09:18:54	00:08:45	782	no	318	185	84	55	381	285	2.1	9	43	353	208	342	12	4.3	267	206	calm	0	136	6
scouting	2	Jeny	Jeny2	2	2	5	2016	Na Justici	unknown	yes	hare	yes	10:06:12	00:04:00	491	no	292	120	50	30	150	90	3.3	5	61	203	341	357	4	5.9	153	146	calm	0	115	26
scouting	11	Jeny	Jeny11	2	29	12	2016	Dlouhy_les	familiar	no	n.a.	n.a.	13:59:39	00:04:10	496	no	239	110	51	25	208	115	5	6	9	34	228	150	23	6.5	191	168	calm	0	195	1
scouting_SR	6	Kara	Kara6	3	19	6	2016	Dlouhy_les	familiar	no	n.a.	n.a.	14:25:07	n.m.	n.m.	no	n.m.	n.m.	n.m.	n.m.	n.m.	n.m.	8	11	153	19	125	185	26	6	55	52	calm	0	208	17
scouting	7	Kara	Kara7	3	5	7	2016	Dlouhy_les	familiar	no	n.a.	n.a.	14:06:42	00:04:15	681	no	264	110	70	30	347	115	7	10	74	91	269	260	14	10.7	403	215	calm	0	204	23
scouting	8	Kara	Kara8	3	5	7	2016	Dlouhy_les	familiar	no	n.a.	n.a.	14:12:57	00:05:55	717	no	434	205	73	70	210	80	0.4	1.1	314	347	308	294	4	8.1	223	168	calm	0	204	23
scouting	12	Kara	Kara12	3	27	7	2016	Dlouhy_les	familiar	no	n.a.	n.a.	14:56:47	00:03:45	347	no	217	130	30	40	100	55	0.3	2.6	108	70	151	183	4	6.3	111	104	calm	0	204	27
scouting_SR	14	Kara	Kara14	3	16	9	2016	Dlouhy_les	familiar	no	n.a.	n.a.	17:31:44	n.m.	n.m.	yes	n.m.	n.m.	n.m.	n.m.	n.m.	n.m.	12	16	221	49	266	238	7	12.6	418	171	calm	0	248	22
scouting	15	Kara	Kara15	3	25	9	2016	Dlouhy_les	familiar	no	n.a.	n.a.	14:58:04	00:07:50	954	no	571	280	90	65	292	125	0.8	4	101	1	251	172	17	7.9	243	91	calm	0	201	20
scouting	19	Kara	Kara19	3	8	10	2016	Pankovo_pole	familiar	yes	unknown	yes	15:08:29	00:13:20	1300	yes	646	380	130	185	492	235	2.3	9	261	308	137	318	14	5.1	524	334	calm	0	216	11
scouting_SR	20	Kara	Kara20	3	14	10	2016	Pankovo_pole	familiar	yes	roe deer	yes	15:07:49	n.m.	n.m.	no	n.m.	n.m.	n.m.	n.m.	n.m.	n.m.	14	15	9	300	49	23	17	14.1	155	130	calm	0	216	15
scouting	23	Kara	Kara23	3	14	10	2016	Pankovo_pole	familiar	no	n.a.	n.a.	15:24:04	00:10:20	1900	yes	950	300	188	70	783	250	2.7	7	40	93	183	180	20	11.2	783	681	calm	0	216	15
scouting	28	Kara	Kara28	3	24	10	2016	Kalberg	unknown	no	n.a.	n.a.	10:33:29	00:06:27	1000	yes	511	208	101	38	434	141	1.9	14	331	301	147	208	20	10.9	370	327	calm	0	135	12
scouting	44	Kara	Kara44	3	11	3	2017	Koda	unknown	no	n.a.	n.a.	11:10:18	00:02:40	574	no	233	60	48	15	293	85	4.1	7	149	334	274	110	13	12.5	311	172	calm	0	158	10
scouting	1	Sara	Sara1	3	16	11	2015	Rubinovice	familiar	yes	hare	yes	09:49:22	00:13:45	1922	no	956	350	196	160	769	315	0.5	4.1	158	322	6	156	6	7.7	490	133	315	15	140	11
scouting	6	Sara	Sara6	4	17	8	2016	Pec	unknown	no	n.a.	n.a.	13:38:47	00:08:50	1146	no	448	195	113	40	585	295	2.7	7	179	224	64	4	53	7.5	629	217	315	5	177	19
scouting	1	Albi	Albi1	9	19	10	2014	Polesi_haj 1	familiar	no	n.a.	n.a.	10:56:02	00:06:15	813	no	478	250	83	35	252	90	4.3	7	220	322	229	217	9	10.1	265	161	0	2	135	11
scouting	8	Albi	Albi8	9	27	10	2014	Kokotske_rybniky	familiar	yes	boar	yes	14:14:42	00:11:15	1678	yes	1184	450	172	90	322	135	0.5	6	321	160	167	107	16	8.5	417	356	180	6	200	9
scouting	12	Albi	Albi12	9	4	11	2014	Ejpovice	familiar	yes	roe deer	yes	16:09:02	00:05:25	487	no	243	185	43	40	201	100	1	7	155	87	3	145	1	7.2	121	93	calm	0	238	12
scouting	15	Albi	Albi15	9	9	11	2014	Polesi_haj 1	familiar	yes	roe deer	yes	14:00:07	00:11:00	1551	no	909	425	166	80	477	155	3.7	8	276	56	123	155	5	10.6	472	162	45	2	213	8
scouting	16	Albi	Albi16	9	9	11	2014	Polesi_haj 1	familiar	no	n.a.	n.a.	14:50:17	00:03:20	412	yes	162	75	39	25	211	100	0.9	9	87	77	289	175	24	7.7	224	125	45	2	213	8
scouting	19	Albi	Albi19	9	2	2	2015	Polesi_haj 1	familiar	yes	roe deer	yes	11:14:52	00:16:35	2629	no	770	270	271	105	1589	620	4	9	20	341	221	19	27	9.2	1184	642	180	9	159	2
scouting_SR	21	Albi	Albi21	9	2	2	2015	Polesi_haj 1	familiar	yes	roe deer	yes	11:42:52	n.m.	n.m.	yes	n.m.	n.m.	n.m.	n.m.	n.m.	n.m.	7	9	58	109	304	48	58	9.3	586	402	270	9	159	2
scouting	29	Albi	Albi29	10	21	6	2015	Milcice	unknown	no	n.a.	n.a.	10:30:57	00:03:25	454	yes	187	90	48	35	219	80	1.6	5	133	211	77	281	5	8.7	251	133	225	11	110	13
scouting	34	Albi	Albi34	10	27	6	2015	Krtin	unknown	no	n.a.	n.a.	14:59:07	00:04:05	421	no	166	100	43	30	211	115	2.3	2.9	111	170	324	214	5	5.9	270	128	0	5	208	17
scouting	36	Albi	Albi36	10	27	6	2015	Krtin	unknown	yes	roe deer	yes	15:38:22	00:08:50	942	no	561	345	93	55	288	130	1.4	7	76	88	27	48	42	6.8	119	105	calm	0	231	18
scouting	40	Albi	Albi40	10	13	9	2015	Kokotske_rybniky	familiar	yes	roe deer	yes	11:57:26	00:09:05	922	yes	470	200	90	60	361	225	2.8	6	94	299	102	184	28	5.8	250	206	calm	0	142	21
scouting	43	Albi	Albi43	10	25	12	2015	Prostredni_vrch	unknown	yes	roe deer	yes	15:34:16	00:07:50	1042	yes	728	340	109	50	205	80	1.1	7	183	349	192	159	1	9	290	210	225	4	221	11
scouting	45	Albi	Albi45	10	25	12	2015	Prostredni_vrch	unknown	no	n.a.	n.a.	16:08:56	00:10:15	995	yes	697	410	97	60	201	145	2.2	5	133	41	228	165	2	5.6	161	71	225	6	233	11
scouting_SR	45	Albi	Albi45	10	25	12	2015	Prostredni_vrch	unknown	no	n.a.	n.a.	16:08:56	n.m.	n.m.	no	n.m.	n.m.	n.m.	n.m.	n.m.	n.m.	2.4	5	197	41	156	140	4	5	215	127	225	6	233	11
scouting	46	Albi	Albi46	10	30	1	2016	Bolevec	unknown	no	n.a.	n.a.	13:56:08	00:05:55	772	no	386	174	77	57	309	124	0.3	1.2	225	287	79	338	22	8.3	349	272	180	17	192	9
scouting	56	Albi	Albi56	10	7	2	2016	Kokotske_rybniky	familiar	no	n.a.	n.a.	11:57:17	00:11:05	1378	no	690	290	145	100	542	275	3	6	355	328	145	133	53	6.7	631	347	calm	0	159	2
scouting	57	Albi	Albi57	10	27	3	2016	Polesi_haj	familiar	no	n.a.	n.a.	10:11:22	00:03:50	606	no	185	70	61	25	360	135	3.5	7	247	308	157	168	5	9.6	287	177	225	2	141	5
scouting	58	Albi	Albi58	10	27	3	2016	Polesi_haj	familiar	no	n.a.	n.a.	10:22:37	00:04:10	496	no	348	180	49	30	98	40	2.6	4.3	79	85	328	7	20	8.1	118	108	225	2	141	5
scouting	59	Albi	Albi59	10	27	3	2016	Polesi_haj	familiar	yes	roe deer	yes	10:29:47	00:12:50	1616	no	819	405	159	80	639	285	0.9	8	105	72	244	167	19	8.1	631	469	225	2	141	5
scouting	61	Albi	Albi61	10	27	3	2016	Polesi_haj	familiar	yes	roe deer	yes	11:08:27	00:09:50	1105	no	769	440	107	55	228	95	4.3	6	167	247	98	223	6	8.3	288	264	225	2	158	7
scouting	62	Albi	Albi62	10	3	4	2016	Polesi_haj	familiar	yes	roe deer	yes	10:05:27	00:17:05	2557	no	2042	785	258	135	256	105	3.3	3.6	92	343	199	348	2	9	374	292	315	5	121	11
scouting	63	Albi	Albi63	10	3	4	2016	Polesi_haj	familiar	no	n.a.	n.a.	10:29:27	00:12:55	1350	no	814	490	136	90	398	195	0.8	1.3	126	77	227	168	59	7	225	190	315	5	121	11
scouting	65	Albi	Albi65	11	18	4	2016	Kokotske_rybniky	familiar	yes	roe deer	yes	18:01:12	00:14:40	2381	yes	714	285	241	105	1427	490	2.5	7	33	5	277	334	8	10.3	1478	419	45	3	265	12
scouting	66	Albi	Albi66	11	18	4	2016	Kokotske_rybniky	familiar	yes	roe deer	yes	18:21:32	00:18:35	2643	no	1843	740	265	160	534	215	7	10	40	142	9	38	4	9.1	771	638	45	3	265	12
scouting	67	Albi	Albi67	11	18	4	2016	Kokotske_rybniky	familiar	yes	roe deer	no	18:50:02	00:16:25	1968	yes	1174	585	194	105	602	295	1.7	9	356	87	23	300	27	7.3	709	161	180	5	265	11
scouting	69	Albi	Albi69	11	23	4	2016	Polesi_haj	familiar	yes	roe deer	yes	14:55:02	00:14:10	2416	no	1450	530	235	105	729	215	1.5	1.8	19	345	160	114	32	12	735	359	315	9	202	13
scouting	70	Albi	Albi70	11	23	4	2016	Polesi_haj	familiar	no	n.a.	n.a.	15:14:37	00:09:25	1185	no	709	335	123	70	353	160	1.1	3.1	6	103	297	25	9	7.8	414	264	315	9	222	13
scouting	71	Albi	Albi71	11	23	4	2016	Polesi_haj	familiar	yes	unknown	yes	15:24:22	00:19:25	2583	no	2065	940	256	130	262	95	0	1	177	37	258	50	9	9	504	380	90	10	222	11
scouting	72	Albi	Albi72	11	19	5	2016	Kokotske_rybniky	familiar	yes	unknown	yes	19:08:19	00:20:54	1741	yes	870	739	179	87	692	428	2.3	6	23	107	265	310	6	5.9	747	567	45	17	283	17
scouting	73	Albi	Albi73	11	21	6	2016	Bolevec	unknown	no	n.a.	n.a.	19:23:21	00:06:10	990	no	693	285	92	40	205	45	5	8	76	92	286	210	7	14.2	276	273	270	8	285	22
scouting	74	Albi	Albi74	11	21	6	2016	Bolevec	unknown	no	n.a.	n.a.	19:33:16	00:02:20	309	yes	86	45	29	15	194	80	6	7	129	147	337	80	9	8.6	194	102	225	6	285	22
scouting	81	Albi	Albi81	11	17	7	2016	Prostredni_vrch	familiar	no	n.a.	n.a.	12:18:03	00:06:27	757	no	377	177	76	40	305	170	1.8	5	115	325	209	71	2	6.6	379	199	315	18	149	20
scouting	83	Albi	Albi83	11	22	7	2016	Kokotske_rybniky	familiar	yes	roe deer	yes	18:41:47	00:09:10	1105	yes	551	300	137	90	416	160	2.4	6	144	87	288	176	8	9.4	462	413	90	12	272	26
scouting	84	Albi	Albi84	11	22	7	2016	Kokotske_rybniky	familiar	no	n.a.	n.a.	19:04:12	00:06:00	607	yes	309	185	62	55	236	120	0.9	5	292	42	284	338	8	6.9	262	95	0	8	283	26
scouting	88	Albi	Albi88	11	26	7	2016	Kokotske_rybniky	familiar	yes	roe deer	yes	19:13:42	00:50:35	6148	yes	4308	1845	615	445	1226	745	0.4	0.9	356	219	64	183	4	5.6	1450	492	45	2	283	21
scouting	91	Albi	Albi91	11	10	8	2016	Kokotske_rybniky	familiar	no	n.a.	n.a.	13:19:42	00:05:05	690	yes	357	175	64	35	269	95	2.4	4.5	229	181	66	357	14	10	270	253	270	5	177	18
scouting	92	Albi	Albi92	11	10	8	2016	Kokotske_rybniky	familiar	no	n.a.	n.a.	13:26:02	00:10:55	904	no	623	435	94	115	187	105	1.1	1.8	259	135	282	349	4	6.2	195	141	270	5	177	18
scouting	97	Albi	Albi97	11	18	9	2016	Kokotske_rybniky	familiar	no	n.a.	n.a.	10:32:00	00:05:10	640	yes	318	156	66	32	256	122	3.4	5	125	31	279	176	2	7.5	291	239	90	10	126	17
scouting	100	Albi	Albi100	11	26	9	2016	Stupno	unknown	yes	unknown	yes	09:41:18	00:09:50	1096	no	662	367	112	70	322	153	0.8	8	146	133	81	358	16	7.4	382	244	calm	0	113	8
scouting	101	Albi	Albi101	11	26	9	2016	Stupno	unknown	no	n.a.	n.a.	10:01:43	00:05:45	717	no	427	220	74	37	214	88	2.2	5	231	160	325	2	12	8.5	228	198	calm	0	126	8
scouting	103	Albi	Albi103	11	26	9	2016	Stupno	unknown	no	n.a.	n.a.	10:57:38	00:03:20	389	no	156	75	39	30	193	95	1.4	3	318	221	14	318	5	7.1	207	110	calm	0	126	13
scouting	109	Albi	Albi109	11	9	10	2016	Polesi_haj	familiar	no	n.a.	n.a.	17:34:36	00:04:15	553	no	385	170	55	35	113	50	4.3	5	65	209	337	206	14	7.2	154	121	45	8	243	9
scouting	110	Albi	Albi110	11	9	10	2016	Polesi_haj	familiar	no	n.a.	n.a.	17:42:11	00:06:15	567	no	396	275	60	45	111	55	1.5	6	218	107	317	133	2	7.1	128	107	45	8	243	9
scouting_SR	111	Albi	Albi111	11	26	10	2016	Kokotske_rybniky	familiar	yes	unknown	yes	14:54:16	n.m.	n.m.	yes	n.m.	n.m.	n.m.	n.m.	n.m.	n.m.	5	10	237	15	138	214	4	9.1	403	265	45	6	200	11
scouting	114	Albi	Albi114	11	26	10	2016	Kokotske_rybniky	familiar	no	n.a.	n.a.	15:44:46	00:06:05	809	yes	322	160	79	50	409	155	2.9	7	332	53	240	168	82	9.3	366	321	45	5	216	11
scouting	119	Albi	Albi119	11	21	1	2017	Kokotske_rybniky	familiar	yes	unknown	yes	11:22:15	00:10:05	1501	yes	896	404	152	49	452	152	5	14	138	357	355	8	87	10.9	472	362	45	3	163	-2
scouting	124	Albi	Albi124	11	29	1	2017	Kokotske_rybniky	familiar	yes	roe deer	yes	11:20:10	00:19:35	2467	yes	993	525	244	125	1232	525	2	12	34	52	261	295	42	8.3	1357	628	calm	0	163	-7
scouting	128	Albi	Albi128	11	5	2	2017	Kokotske_rybniky	familiar	yes	roe deer	yes	11:34:14	00:15:40	2059	no	1030	457	202	110	828	373	0.9	5	283	74	80	199	21	7.7	970	518	270	13	159	7
scouting	1	Hugo	Hugo1	2	27	10	2014	Kokotske_rybniky	familiar	no	n.a.	n.a.	14:13:33	00:07:25	883	no	426	215	87	55	369	175	3.4	6	353	98	291	219	10	6.8	105	96	180	9	200	9
scouting	2	Hugo	Hugo2	2	9	11	2014	Polesi_haj 2	familiar	no	n.a.	n.a.	14:00:41	00:08:30	1429	no	858	320	131	55	441	135	7	8	154	87	164	94	5	11	555	76	45	2	213	8
scouting	7	Hugo	Hugo7	2	2	2	2015	Polesi_haj 1	familiar	yes	roe deer	yes	11:43:01	00:22:05	2689	no	2129	1050	274	155	288	120	1.2	2.6	295	111	291	2	5	8.4	439	306	270	9	159	2
scouting	12	Hugo	Hugo12	3	21	6	2015	Milcice	unknown	no	n.a.	n.a.	10:31:11	00:06:15	631	yes	257	150	58	55	314	170	1.6	1.9	5	253	82	171	6	6.3	338	150	225	11	110	13
scouting	14	Hugo	Hugo14	3	27	6	2015	Krtin	unknown	yes	roe deer	yes	15:11:26	00:07:10	1063	no	622	250	110	65	332	115	0.7	5	200	34	165	196	4	10	365	290	0	5	231	17
scouting	20	Hugo	Hugo20	4	27	3	2016	Polesi_haj 1	familiar	no	n.a.	n.a.	10:22:40	00:03:35	458	no	274	130	46	25	139	60	3.4	5	226	95	331	102	5	8	144	132	225	2	141	5
scouting	24	Hugo	Hugo24	4	3	4	2016	Polesi_haj 1	familiar	yes	roe deer	yes	10:05:25	00:08:20	1383	no	543	185	136	55	705	260	3.7	7	244	333	91	101	5	9.9	753	203	315	5	121	11
scouting	26	Hugo	Hugo26	4	3	4	2016	Polesi_haj 1	familiar	no	n.a.	n.a.	10:29:30	00:05:20	556	no	392	230	56	40	108	50	1	6	343	92	246	30	2	7.1	148	139	315	5	121	11
scouting	28	Hugo	Hugo28	4	10	4	2016	Stupno	unknown	yes	roe deer	yes	12:15:30	00:12:45	1419	yes	721	425	150	100	549	240	2	3.9	101	359	221	6	5	7.6	318	216	0	5	157	9
scouting	35	Hugo	Hugo35	4	23	4	2016	Polesi_haj 1	familiar	yes	roe deer	yes	15:14:15	00:09:30	1364	no	677	315	130	60	557	195	0.7	5	347	83	207	165	57	9.8	606	82	315	9	222	13
scouting	36	Hugo	Hugo36	4	23	4	2016	Polesi_haj 1	familiar	yes	roe deer	yes	15:23:55	00:12:10	1713	no	1195	470	168	85	350	175	2.6	5	76	49	216	325	4	6.9	395	301	90	10	222	11
scouting	40	Hugo	Hugo40	4	21	6	2016	Bolevecke_rybniky	unknown	no	n.a.	n.a.	19:51:27	00:09:15	1222	yes	860	390	120	75	241	90	1.2	2.9	65	98	212	133	2	8.7	290	259	225	6	285	22
scouting	47	Hugo	Hugo47	4	5	7	2016	Nove_domky	familiar	no	n.a.	n.a.	09:16:41	00:02:59	308	no	183	125	29	20	95	34	1.8	5	233	44	145	128	7	8.6	109	108	225	6	97	20
scouting	48	Hugo	Hugo48	4	5	7	2016	Nove_domky	familiar	no	n.a.	n.a.	09:31:11	00:05:20	506	no	204	142	50	42	251	136	1.4	2.6	187	14	170	19	16	6.2	266	159	225	6	97	20
scouting_SR	70	Hugo	Hugo70	4	26	10	2016	Kokotske_rybniky	familiar	no	n.a.	n.a.	15:31:25	n.m.	n.m.	yes	n.m.	n.m.	n.m.	n.m.	n.m.	n.m.	2.5	5	86	177	337	142	5	9.5	402	224	45	5	216	11
scouting	75	Hugo	Hugo75	4	29	1	2017	Kokotske_rybniky	familiar	no	n.a.	n.a.	10:56:09	00:02:55	380	no	160	70	29	15	193	90	3.5	4.1	164	170	353	181	2	7.8	219	153	225	3	149	-8
scouting	7	Upirek	Upirek7	1	26	10	2016	Kokotske_rybniky	unknown	no	n.a.	n.a.	16:01:52	00:10:10	994	no	493	305	99	75	403	230	1.3	1.4	149	293	145	153	3	5.4	100	89	45	6	231	11
scouting_SR	20	Upirek	Upirek20	1	5	2	2017	Kokotske_rybniky	familiar	no	n.a.	n.a.	11:10:11	n.m.	n.m.	yes	n.m.	n.m.	n.m.	n.m.	n.m.	n.m.	2	3.7	113	73	256	111	4	7.2	228	48	225	14	159	6
scouting	2	Demi	Demi2	4	27	9	2016	Omice	familiar	no	n.a.	n.a.	16:14:07	00:12:20	555	no	225	270	53	375	276	95	1.4	1.5	53	271	119	195	23	2.54	297	192	135	3	235	21
scouting	3	Demi	Demi3	4	29	9	2016	Ridelov	familiar	yes	roe deer	no	10:16:10	00:19:25	2458	yes	1726	787	247	176	484	202	0.2	3.9	318	161	174	217	5	8.5	311	270	270	2	126	16
scouting_SR	6	Demi	Demi6	4	30	9	2016	Ridelov	familiar	yes	roe deer	no	17:05:40	n.m.	n.m.	yes	n.m.	n.m.	n.m.	n.m.	n.m.	n.m.	7	11	105	255	100	127	35	11.4	311	257	270	5	248	23
scouting_SR	10	Demi	Demi10	4	18	10	2016	Omice	familiar	yes	unknown	no	11:14:27	n.m.	n.m.	yes	n.m.	n.m.	n.m.	n.m.	n.m.	n.m.	9	10	296	192	354	312	60	10.7	235	138	225	4	150	8
scouting_SR	11	Demi	Demi11	4	21	10	2016	Samotin	familiar	yes	unknown	no	12:18:45	n.m.	n.m.	yes	n.m.	n.m.	n.m.	n.m.	n.m.	n.m.	8	12	263	94	246	268	5	13.3	296	222	calm	0	166	7
scouting	19	Demi	Demi19	4	9	11	2016	Strelice	familiar	yes	roe deer	no	10:27:47	00:05:20	1420	no	723	155	149	40	549	125	2.4	3.8	277	124	52	127	27	15.8	571	474	225	6	153	1
scouting_SR	30	Demi	Demi30	4	7	12	2016	Strelice	familiar	yes	roe deer	no	10:42:47	n.m.	n.m.	no	n.m.	n.m.	n.m.	n.m.	n.m.	n.m.	6	7	54	200	332	40	3	10.9	292	146	270	1	153	-2
scouting	39	Demi	Demi39	4	13	2	2017	Ostopovice	familiar	yes	unknown	yes	14:02:46	00:16:15	1783	no	1603	835	182	125	181	140	0.8	2.2	167	80	185	184	8	4.4	193	129	180	9	208	2
scouting	40	Demi	Demi40	4	25	2	2017	Omice	familiar	no	n.a.	n.a.	12:48:31	00:05:10	746	yes	373	185	83	55	290	70	1.1	2.2	290	10	140	217	13	13.1	296	291	315	16	176	3
scouting	43	Demi	Demi43	4	8	3	2017	Omice	familiar	no	n.a.	n.a.	10:47:06	00:06:40	1106	yes	517	235	113	45	474	120	2.3	2.9	297	3	130	337	2	13.3	501	434	315	13	141	5
scouting_SR	9	Cecil	Cecil9	4	5	7	2016	Nove_domky	unknown	no	n.a.	n.a.	09:18:07	n.m.	n.m.	no	n.m.	n.m.	n.m.	n.m.	n.m.	n.m.	1.3	2.5	196	27	139	147	2	7.3	108	104	225	6	97	20
scouting	20	Cecil	Cecil20	4	31	7	2016	Krusovice	unknown	no	n.a.	n.a.	12:43:57	00:06:10	710	yes	359	225	78	45	274	100	2.5	2.8	80	156	313	34	2	9.7	298	212	180	7	149	21
scouting	33	Cecil	Cecil33	4	18	8	2016	Sv_jan	familiar	no	n.a.	n.a.	16:01:17	00:04:05	445	no	225	120	40	25	180	100	2.1	6	75	81	267	163	2	6.5	190	168	90	8	240	23
scouting	40	Cecil	Cecil40	4	25	9	2016	Horni_Bezdekov	familiar	yes	roe deer	yes	14:18:57	00:14:15	1667	yes	833	365	162	125	671	365	0.9	3.1	223	106	317	39	13	6.6	709	630	135	8	201	19
scouting	47	Cecil	Cecil47	4	17	12	2016	Krusovice	familiar	no	n.a.	n.a.	13:39:57	00:08:00	1216	yes	602	300	96	45	309	135	1.2	5	257	87	32	90	2	9.9	193	144	225	7	195	-1
scouting_SR	53	Cecil	Cecil53	4	1	3	2017	Stupno	unknown	yes	roe deer	no	14:46:01	n.m.	n.m.	no	n.m.	n.m.	n.m.	n.m.	n.m.	n.m.	0.4	9	183	84	240	212	21	11.9	179	174	180	18	213	7
scouting	2	Hennessy	Hennessy2	2	20	6	2015	Litomysl	familiar	no	n.a.	n.a.	05:24:51	00:05:30	616	no	413	165	66	55	138	110	0	1.3	294	261	94	6	13	4.6	191	91	90	3	52	11
scouting	6	Hennessy	Hennessy6	2	23	6	2015	Litomysl	familiar	yes	hare	no	05:48:11	00:07:40	1488	no	883	280	126	60	479	120	2	9	78	129	289	144	3	12.2	557	317	45	14	52	13
scouting	7	Hennessy	Hennessy7	2	27	6	2015	Litomysl	familiar	yes	hare	no	05:35:16	00:04:15	938	yes	439	55	80	55	419	145	0.3	1.2	87	331	136	262	18	9	459	355	135	3	52	17
scouting	9	Hennessy	Hennessy9	2	30	6	2015	Litomysl	familiar	no	n.a.	n.a.	05:35:26	00:02:05	479	no	262	75	36	15	180	35	4.4	7	80	179	301	11	6	16.8	211	194	90	3	52	13
scouting	11	Hennessy	Hennessy11	2	5	7	2015	Trzek	familiar	no	n.a.	n.a.	05:20:15	00:02:30	582	no	313	80	42	20	226	50	4.2	8	96	247	299	333	16	14.9	238	212	225	3	54	19
scouting	14	Hennessy	Hennessy14	2	12	7	2015	Trzek	familiar	yes	unknown	no	06:02:15	00:17:45	2724	no	1918	790	269	130	538	145	4.1	7	289	138	3	337	6	10.8	752	415	45	5	63	12
scouting	20	Hennessy	Hennessy20	2	2	8	2015	Trzek	familiar	no	n.a.	n.a.	05:19:41	00:03:56	1206	yes	485	40	128	54	594	142	0.7	7	256	107	307	261	103	14.8	509	486	135	5	67	18
scouting	22	Hennessy	Hennessy22	2	10	8	2015	Litomysl	familiar	no	n.a.	n.a.	05:32:45	00:15:57	2516	yes	1767	428	254	276	494	253	3.8	6	115	16	158	148	33	6.6	586	422	180	5	67	20
scouting	24	Hennessy	Hennessy24	2	25	8	2015	Trzek	familiar	no	n.a.	n.a.	06:26:13	00:02:37	993	no	686	91	99	26	206	40	3.1	3.2	31	272	50	16	9	17.1	287	255	225	23	67	19
scouting	26	Hennessy	Hennessy26	2	6	9	2015	Trzek	familiar	yes	unknown	no	06:33:32	00:14:37	2431	no	1460	465	241	175	729	237	0.2	1.6	307	196	101	337	117	9.9	767	564	225	27	84	11
scouting	27	Hennessy	Hennessy27	2	3	10	2015	Trzek	familiar	no	n.a.	n.a.	07:05:49	00:02:07	645	no	200	49	59	29	386	49	1.6	8	117	248	27	357	10	22.5	399	186	90	24	102	10
scouting	29	Hennessy	Hennessy29	2	5	10	2015	Trzek	familiar	yes	unknown	no	10:58:29	00:19:28	2399	no	1437	588	241	159	722	421	0.7	5	260	246	102	1	26	6.1	882	533	225	5	135	14
scouting	30	Hennessy	Hennessy30	2	10	10	2015	Trzek	familiar	no	n.a.	n.a.	07:27:00	00:07:20	932	no	574	270	92	60	265	110	0.6	4.3	38	292	127	1	13	7.4	357	317	135	6	102	8
scouting	42	Hennessy	Hennessy42	2	5	12	2015	Trzek	familiar	yes	unknown	no	07:21:05	00:06:04	2069	no	1245	146	207	50	618	168	9	10	196	273	118	154	59	13.3	670	542	180	1	127	5
scouting	43	Hennessy	Hennessy43	2	6	12	2015	Trzek	familiar	yes	unknown	no	08:01:34	00:31:16	5997	yes	3000	1094	579	80	2399	695	11	21	85	217	330	206	51	12.9	2501	1350	90	16	128	3
scouting	44	Hennessy	Hennessy44	2	20	12	2015	Trzek	familiar	yes	unknown	no	08:02:30	00:20:14	3507	no	2456	825	348	121	704	268	0.9	5	244	136	8	185	25	10.1	988	730	135	21	128	4
scouting	46	Hennessy	Hennessy46	2	24	12	2015	Trzek	familiar	yes	roe deer	no	07:33:51	00:09:20	2527	no	1004	359	263	71	1260	130	3.9	5	138	147	299	54	8	30.9	1419	896	135	1	127	4
scouting	47	Hennessy	Hennessy47	2	25	12	2015	Litomysl	familiar	no	n.a.	n.a.	07:45:51	00:08:47	1273	no	635	197	129	122	510	208	0.7	3.6	99	131	254	325	17	8.8	573	506	135	6	127	3
scouting	49	Hennessy	Hennessy49	2	29	12	2016	Litomysl	familiar	no	n.a.	n.a.	07:23:38	00:16:08	2712	yes	2162	711	273	163	277	94	1.1	5	348	355	161	196	7	7.7	552	500	135	3	127	1
scouting	51	Hennessy	Hennessy51	2	30	12	2015	Litomysl	familiar	yes	roe deer	no	07:46:42	00:07:32	1428	yes	996	310	145	64	287	78	1.2	8	199	79	298	4	10	12.1	367	226	90	14	127	-1
scouting	54	Hennessy	Hennessy54	2	1	1	2016	Litomysl	familiar	no	n.a.	n.a.	07:44:56	00:02:55	1028	no	609	54	110	32	310	89	1.2	6	129	285	120	134	72	12.3	255	148	calm	0	123	-2
scouting	56	Hennessy	Hennessy56	2	2	1	2016	Litomysl	familiar	no	n.a.	n.a.	07:59:56	00:05:53	1366	yes	543	253	130	30	692	70	3.4	5	250	210	29	225	2	30.4	540	220	135	10	123	0
scouting	57	Hennessy	Hennessy57	2	2	1	2016	Litomysl	familiar	no	n.a.	n.a.	08:06:20	00:07:23	990	yes	792	299	101	122	97	22	1.3	6	239	153	353	12	2	5.6	276	208	135	10	124	0
scouting	60	Hennessy	Hennessy60	2	10	1	2016	Trzek	familiar	yes	roe deer	no	07:37:05	00:07:10	1702	yes	856	100	167	30	679	300	16	17	262	115	39	278	9	9.1	809	529	135	11	123	2
scouting	61	Hennessy	Hennessy61	2	14	1	2016	Litomysl	familiar	yes	roe deer	no	06:29:37	00:18:48	1724	no	689	528	173	160	863	440	0.7	9	105	249	56	4	7	7.1	887	216	45	6	123	0
scouting	62	Hennessy	Hennessy62	2	16	1	2016	Trzek	familiar	yes	roe deer	no	07:25:36	00:08:42	3030	no	2134	298	295	70	601	154	3.5	14	282	344	148	185	19	14.5	844	696	45	11	123	-1
scouting	67	Hennessy	Hennessy67	2	31	1	2016	Trzek	familiar	yes	unknown	no	07:31:40	00:08:57	2580	no	1025	151	264	141	1290	245	0.2	7	309	290	144	176	12	16.7	1488	749	270	23	123	3
scouting	70	Hennessy	Hennessy70	2	11	2	2016	Trzek	familiar	yes	unknown	no	11:11:02	00:04:56	1915	yes	1127	157	191	31	597	108	1.2	9	48	234	136	140	7	19.5	602	493	270	37	159	5
scouting	76	Hennessy	Hennessy76	2	20	2	2016	Trzek	familiar	yes	roe deer	no	07:40:19	00:10:05	3226	no	1613	278	324	121	1289	206	0.9	2.1	125	297	100	326	7	19.4	1353	885	270	10	109	2
scouting	77	Hennessy	Hennessy77	2	24	2	2016	Trzek	familiar	yes	roe deer	no	09:05:27	00:12:38	3572	no	1781	211	358	67	1432	480	1	8	320	326	127	175	116	10.9	1394	1106	270	27	131	2
scouting	82	Hennessy	Hennessy82	2	6	3	2016	Trzek	familiar	yes	unknown	no	07:27:40	00:05:44	1882	no	933	114	197	66	752	164	1.3	8	83	318	183	55	53	16.3	719	688	270	8	101	6
scouting	84	Hennessy	Hennessy84	3	13	3	2016	Trzek	familiar	yes	unknown	no	06:43:48	00:04:07	1210	no	488	50	114	24	610	173	5	10	327	238	76	354	3	12.7	633	538	225	5	93	3
scouting	85	Hennessy	Hennessy85	3	2	4	2016	Trzek	familiar	yes	roe deer	no	07:39:40	00:04:07	1784	yes	717	54	170	32	897	161	7	11	304	84	168	201	29	19.8	884	529	90	5	83	0
scouting	86	Hennessy	Hennessy86	3	5	4	2016	Trzek	familiar	yes	unknown	no	13:39:19	00:03:42	1640	no	651	61	172	50	816	111	1.1	22	92	27	135	177	47	26.4	800	732	225	16	179	24
scouting_SR	89	Hennessy	Hennessy89	3	19	4	2016	Trzek	familiar	yes	roe deer	no	06:44:05	n.m.	n.m.	no	n.m.	n.m.	n.m.	n.m.	n.m.	n.m.	0.9	2.3	288	332	212	84	30	9.8	745	667	calm	0	73	4
scouting	90	Hennessy	Hennessy90	3	26	4	2016	Trzek	familiar	no	n.a.	n.a.	07:21:35	00:02:01	1096	no	733	58	128	23	235	40	2.8	7	221	294	335	11	51	20.9	265	258	90	13	83	3
scouting	91	Hennessy	Hennessy91	3	28	4	2016	Trzek	familiar	yes	roe deer	no	06:00:33	00:02:40	1384	no	714	56	130	26	541	78	4	8	19	306	216	274	2	23.7	657	578	calm	0	73	2
scouting	102	Hennessy	Hennessy102	3	3	11	2016	Trzek	familiar	yes	roe deer	no	14:20:57	00:03:27	1445	no	708	72	150	24	586	111	13	14	200	290	194	202	51	18.8	567	513	225	19	213	5
scouting	106	Hennessy	Hennessy106	3	21	12	2016	Trzek	familiar	no	n.a.	n.a.	06:43:42	00:03:13	1108	yes	548	68	119	30	439	95	2.5	14	153	55	286	350	38	16.5	458	419	90	18	127	-3
scouting	12	Bay	Bay12	3	11	8	2016	Modrejovice	familiar	no	n.a.	n.a.	17:07:37	00:04:25	824	no	242	70	84	35	500	160	3.9	5	27	78	239	357	5	11.2	513	304	270	8	254	19
scouting	14	Bay	Bay14	3	11	8	2016	Modrejovice	familiar	no	n.a.	n.a.	17:25:02	00:02:50	386	no	159	60	41	20	186	90	6	7	242	184	33	152	14	7.5	194	162	45	10	254	18
scouting	15	Bay	Bay15	4	30	12	2017	Modrejovice	familiar	yes	unknown	no	13:51:01	00:12:30	1192	no	470	240	116	95	607	415	0.1	1.2	18	217	35	355	30	5.2	478	228	180	13	195	2
scouting	16	Bay	Bay16	4	30	12	2017	Modrejovice	familiar	yes	unknown	yes	14:25:21	00:06:45	504	yes	298	245	50	45	155	115	1.2	3.6	158	27	212	348	20	4.7	149	54	180	13	209	2
scouting	3	Gina	Gina3	1	16	7	2016	Modrejovice	unknown	yes	roe deer	yes	10:51:27	00:04:50	647	yes	247	105	67	40	333	145	3.3	6	26	15	202	220	3	7.9	385	180	45	16	110	19
scouting	6	Gina	Gina6	1	17	9	2016	Modrejovice	unknown	yes	unknown	yes	14:25:08	00:17:05	1377	no	684	508	139	145	554	372	0.6	2.8	256	219	20	344	31	5.3	529	302	0	8	201	17
scouting	9	Gina	Gina9	1	24	9	2016	Ronov	unknown	no	n.a.	n.a.	09:21:12	00:06:20	902	no	460	215	87	35	356	130	5	10	332	205	137	244	3	9.8	358	200	45	2	113	11
scouting_SR	1	Safira	Safira1	2	16	9	2016	Modrejovice	familiar	yes	roe deer	yes	09:32:37	n.m.	n.m.	no	n.m.	n.m.	n.m.	n.m.	n.m.	n.m.	1	12	289	132	317	355	9	5	345	264	270	3	113	18
scouting	2	Safira	Safira2	2	16	9	2016	Modrejovice	familiar	yes	roe deer	yes	09:56:27	00:18:05	1562	no	1260	895	152	130	149	60	0.5	3	346	95	86	170	3	5.8	282	211	225	3	113	21
scouting	5	Safira	Safira5	2	11	10	2016	Modrejovice	familiar	no	n.a.	n.a.	10:36:39	00:03:06	471	yes	189	61	45	29	237	96	0	10	195	167	42	330	4	8.5	222	111	45	3	135	6
scouting	6	Safira	Safira6	2	11	10	2016	Modrejovice	familiar	yes	unknown	yes	11:07:49	00:07:31	741	no	445	244	75	66	221	141	0.8	3.7	351	353	143	313	7	5.2	253	169	45	3	150	6
scouting_SR	9	Safira	Safira9	3	27	12	2017	Modrejovice	familiar	yes	unknown	yes	13:50:55	n.m.	n.m.	no	n.m.	n.m.	n.m.	n.m.	n.m.	n.m.	7	9	333	196	39	356	10	5.6	508	409	90	6	195	-1
scouting	14	Safira	Safira14	3	30	12	2017	Modrejovice	familiar	yes	roe deer	yes	13:44:30	00:10:55	1546	no	771	360	59	80	614	215	0.2	1	29	257	56	161	9	9.7	663	612	180	13	195	2
scouting	15	Safira	Safira15	3	30	12	2017	Modrejovice	familiar	yes	unknown	yes	14:16:30	00:13:35	1096	no	662	500	113	105	324	210	2.3	3.4	237	331	344	340	10	5.3	393	247	180	13	209	2
scouting	2	Kuky	Kuky2	5	10	4	2016	Stupno	unknown	yes	roe deer	no	12:17:42	00:12:35	1373	no	546	240	139	83	687	432	3.1	3.3	31	325	205	338	33	6.5	176	93	315	12	157	6
scouting	4	Kuky	Kuky4	6	11	2	2017	Prostredni_vrch	unknown	yes	roe deer	no	14:53:28	00:02:12	339	yes	138	47	35	20	166	65	1.1	9	67	159	354	235	7	8.8	176	68	135	6	208	0
scouting	1	Amala	Amala1	6	15	9	2016	Luzna	familiar	no	n.a.	n.a.	08:32:41	00:02:40	331	no	231	110	31	15	69	35	4.2	9	195	209	20	20	6	7.6	94	92	45	6	100	19
scouting	2	Amala	Amala2	6	15	9	2016	Luzna	familiar	yes	roe deer	yes	08:38:31	00:25:40	2142	yes	1492	1110	220	180	430	250	1.5	2.6	267	171	13	79	4	5.5	504	374	45	6	100	19
scouting	3	Amala	Amala3	6	15	9	2016	Luzna	familiar	yes	unknown	yes	09:29:56	00:06:10	336	no	217	270	32	35	88	65	0.5	7	332	300	179	330	12	4.9	77	68	45	6	113	19
scouting	4	Amala	Amala4	6	29	9	2016	Luzna	familiar	yes	boar	yes	14:01:51	00:14:50	1121	no	447	335	115	105	559	450	0.5	2.7	198	321	98	214	27	4.5	589	274	225	18	201	22
scouting	5	Amala	Amala5	6	8	10	2016	Luzna	familiar	yes	boar	yes	09:14:32	00:19:35	1399	no	968	730	137	200	291	245	0.3	0.5	87	290	63	172	18	3.54	410	316	315	5	122	6

## Sheet: Tracking
Return strategy (tracking_SR= second return)	Track ID	Dog	ID	Age (years)	Day	Month	Year	Locality	Familiarity with the area	Game following	Game species	Dog was calling	Starting time	Duration	Total lenght (m)	Using forest path	Lenght outbound (m)	Duration outbound (sec)	Lenght turning trajectory (m)	Duration turning trajectory (sec)	Lenght inbound (m)	Duration inbound (sec)	Speed of turning point (km/h)	Speed after turning point (km/h)	Azimuth before compass run (°)	Azimut A (°)	Azimuth B (°)	Azimuth C (Compass run) (°)	Length of compass run (m)	Inbound speed (km/h)	Wind direction (°)	Wind speed (km/h)	Temperature (°C)
tracking	4	Bessy	Bessy4	7	21	7	2016	Stupno	unknown	yes	roe deer	no	09:36:20	00:04:35	390	no	196	145	33	47	161	83	0.3	0.7	138	177	354	204	7	5.5	135	4	24.2
tracking	5	Bessy	Bessy5	7	21	7	2016	Stupno	unknown	yes	roe deer	yes	10:03:47	00:03:25	609	no	310	90	66	30	233	85	3	3.8	273	334	44	92	13	9.6	135	5	22.5
tracking	6	Bessy	Bessy6	7	5	3	2017	Ryman	unknown	yes	unknown	yes	14:01:10	00:14:40	2326	no	1427	510	227	145	674	225	1	1.7	124	163	24	48	19	9.7	225	11	11
tracking_SR	6	Bessy	Bessy6	7	5	3	2017	Ryman	unknown	yes	unknown	yes	14:01:10	n.m.	n.m.	no	n.m.	n.m.	n.m.	n.m.	n.m.	n.m.	2.6	5	283	163	42	320	10	11.2	225	11	11
tracking	7	Bessy	Bessy7	7	5	3	2017	Ryman	familiar	yes	unknown	yes	15:07:10	00:04:10	667	yes	403	170	67	25	198	55	8	9	282	166	25	316	9	13	180	13	10
tracking	8	Bessy	Bessy8	7	5	3	2017	Ryman	unknown	yes	roe deer	yes	15:19:45	00:10:00	1464	no	584	180	148	85	733	335	0.3	0.7	355	345	197	44	22	7.8	180	13	10
tracking_SR	9	Bessy	Bessy9	7	8	3	2017	Stupno	unknown	yes	unknown	yes	15:01:02	n.m.	n.m.	no	n.m.	n.m.	n.m.	n.m.	n.m.	n.m.	9	13	81	298	105	110	5	9.2	225	21	6
tracking	10	Bessy	Bessy10	7	8	3	2017	Stupno	unknown	yes	unknown	yes	15:10:35	00:15:00	2696	no	1613	505	283	120	800	275	7	9	39	164	52	353	8	9.9	225	21	6
tracking	1	Gofi	Gofi1	2	31	5	2016	Aldasin	unknown	yes	hare	no	10:39:16	00:02:31	468	no	223	75	51	20	194	70	4.5	5	244	42	135	80	19	10	0	5	20
tracking	19	Gofi	Gofi19	2	2	8	2016	Stupno	unknown	no	n.a.	n.a.	15:09:07	00:02:55	416	no	209	80	45	35	164	60	5	10	160	155	335	325	17	7.8	180	4	19
tracking	20	Gofi	Gofi20	2	2	8	2016	Stupno	unknown	no	n.a.	n.a.	15:15:17	00:02:35	249	no	105	45	26	35	117	75	0.6	7	205	166	334	312	15	5.6	180	4	19
tracking	22	Gofi	Gofi22	2	11	8	2016	Osada Rejnov	unknown	no	n.a.	n.a.	09:07:52	00:04:10	423	no	205	150	42	30	175	70	0.4	1.7	5	240	80	120	45	8.8	180	8	13
tracking	25	Gofi	Gofi25	2	13	8	2016	Lupene	unknown	yes	hare	yes	06:59:02	00:03:40	431	no	218	100	43	40	170	80	0.5	1.4	239	166	347	341	3	7.3	calm	0	13.1
tracking	26	Gofi	Gofi26	2	13	8	2016	Lupene	unknown	yes	unknown	yes	07:06:32	00:02:25	345	no	148	80	39	10	157	55	7	13	277	29	135	50	4	10.3	calm	0	13.1
tracking	27	Gofi	Gofi27	2	14	8	2016	Hnevkov	unknown	no	n.a.	n.a.	10:09:32	00:04:15	338	no	79	65	36	35	284	180	1.4	4.2	276	122	230	87	6	5.2	calm	0	16.4
tracking	30	Gofi	Gofi30	2	11	9	2016	Jestrebi	unknown	no	n.a.	n.a.	07:23:32	00:01:50	234	no	117	70	24	15	94	25	2.8	5	240	177	17	3	15	13.5	calm	0	12
tracking	31	Gofi	Gofi31	2	23	9	2016	Prostredni_vrch	unknown	yes	roe deer	yes	08:31:37	00:02:15	351	no	166	55	40	30	146	50	0.5	2.7	77	53	172	244	8	9.9	calm	0	9
tracking	34	Gofi	Gofi34	2	26	9	2016	Stupno	unknown	no	n.a.	n.a.	09:42:27	00:16:20	2239	no	449	145	220	130	1569	705	1.1	2.2	78	155	70	103	19	7.7	calm	0	9
tracking	35	Gofi	Gofi35	2	26	9	2016	Stupno	unknown	no	n.a.	n.a.	10:07:47	00:02:25	380	no	151	55	40	25	190	65	1.3	3.2	63	143	327	287	11	10.5	calm	0	11
tracking	36	Gofi	Gofi36	2	26	9	2016	Stupno	unknown	yes	unknown	yes	10:57:07	00:04:15	660	no	209	75	70	35	380	145	2.9	5	57	213	23	208	4	9.4	calm	0	14
tracking	37	Gofi	Gofi37	2	26	9	2016	Stupno	unknown	yes	unknown	yes	11:01:57	00:02:20	242	no	119	75	30	20	93	45	1.1	4.3	225	214	23	123	2	7.3	calm	0	14
tracking	39	Gofi	Gofi39	2	28	10	2016	Hnevkov	familiar	no	n.a.	n.a.	09:47:12	00:02:15	342	no	175	55	21	15	146	65	0.8	7	134	253	15	326	28	7.9	calm	0	5.2
tracking	40	Gofi	Gofi40	2	28	10	2016	Hnevkov	familiar	yes	unknown	yes	09:56:22	00:03:30	435	yes	201	100	50	20	185	90	4.4	5	104	87	348	231	13	7.7	calm	0	5
tracking	42	Gofi	Gofi42	2	28	12	2016	Pobuci	unknown	yes	unknown	yes	10:11:57	00:13:15	1680	no	849	395	168	100	663	300	1.9	5	75	181	20	280	15	7.5	315	3	1.6
tracking	43	Gofi	Gofi43	2	31	12	2016	Hnevkov	familiar	yes	boar	yes	09:50:57	00:06:30	1088	no	563	185	107	55	418	150	9	8	168	31	225	332	23	9.7	0	3	-6.7
tracking	44	Gofi	Gofi44	2	3	1	2017	Svarovska_lipa	unknown	yes	unknown	yes	14:02:41	00:05:15	1294	no	764	170	120	35	412	110	8	14	217	214	41	34	357	12.4	270	27	0.7
tracking	46	Gofi	Gofi46	2	3	1	2017	Svarovska_lipa	unknown	yes	unknown	yes	14:40:11	00:22:25	3771	no	1901	545	383	200	1488	600	3.1	6	317	184	14	135	12	9.6	225	22	0.7
tracking_SR	47	Gofi	Gofi47	2	12	2	2017	Prostredni_vrch	familiar	yes	unknown	yes	12:53:36	n.m.	n.m.	no	n.m.	n.m.	n.m.	n.m.	n.m.	n.m.	3.4	9	308	286	70	53	29	13	90	8	0.8
tracking	51	Gofi	Gofi51	2	12	2	2017	Prostredni_vrch	unknown	no	n.a.	n.a.	13:21:21	00:02:15	419	no	179	55	44	15	195	65	11	8	267	218	66	351	10	10.9	135	9	0.9
tracking	54	Gofi	Gofi54	2	12	2	2017	Prostredni_vrch	unknown	yes	unknown	yes	13:34:06	00:02:50	412	no	193	75	36	15	183	80	3.3	8	172	307	87	47	5	8.2	90	8	1
tracking	55	Gofi	Gofi55	2	12	2	2017	Prostredni_vrch	unknown	yes	hare	yes	13:45:06	00:03:45	593	no	291	70	61	30	240	125	4.5	12	200	306	126	1	26	6.9	90	8	1
tracking	56	Gofi	Gofi56	2	5	3	2017	Ryman	unknown	yes	unknown	yes	14:28:30	00:10:40	1373	no	678	230	135	100	561	310	0.5	1.4	112	308	153	294	16	6.2	225	17	10
tracking	2	Hard	Hard2	1	7	2	2017	Tachlovice	unknown	yes	roe deer	no	08:08:26	00:01:20	275	no	138	40	14	15	123	25	0	14	288	27	167	141	21	17.8	0	9	-2.5
tracking	3	Hard	Hard3	1	7	2	2017	Tachlovice	unknown	yes	roe deer	yes	08:29:01	00:03:30	883	no	510	110	94	30	279	70	0.5	7	238	23	341	3	40	14.5	0	9	-2.5
tracking	7	Hard	Hard7	1	12	2	2017	Prostredni_vrch	unknown	no	n.a.	n.a.	13:21:18	00:02:22	443	no	215	62	41	15	189	65	4	9	239	240	65	79	35	10.4	135	9	0.9
tracking	8	Hard	Hard8	1	12	2	2017	Prostredni_vrch	unknown	yes	unknown	yes	13:33:55	00:02:58	414	no	257	100	36	15	121	63	7	7	154	267	102	53	17	7.3	90	8	1.1
tracking	9	Hard	Hard9	1	12	2	2017	Prostredni_vrch	unknown	yes	hare	yes	13:45:10	00:03:45	578	no	348	113	57	25	172	87	4	5	257	295	126	139	18	7.4	90	8	1.1
tracking	10	Hard	Hard10	1	16	2	2017	Ryman	unknown	no	n.a.	n.a.	10:52:21	00:02:25	315	no	154	80	29	25	133	40	1.8	3	158	307	51	278	7	11	270	8	5.1
tracking	13	Hard	Hard13	1	16	2	2017	Ryman	unknown	yes	roe deer	no	11:31:16	00:05:20	904	no	531	175	92	45	282	100	1.9	5	114	2	228	4	2	10	270	6	8.4
tracking	14	Hard	Hard14	1	16	2	2017	Ryman	unknown	yes	roe deer	no	11:50:51	00:01:25	294	no	207	55	25	10	62	20	8	10	228	75	298	291	12	11.1	270	6	8.4
tracking_SR	15	Hard	Hard15	1	5	3	2017	Ryman	unknown	yes	roe deer	yes	14:02:23	n.m.	n.m.	no	n.m.	n.m.	n.m.	n.m.	n.m.	n.m.	12	15	93	206	28	36	41	16	225	11	11
tracking	18	Hard	Hard18	1	8	3	2017	Stupno	unknown	yes	unknown	yes	15:01:05	00:04:43	740	no	448	169	70	42	225	72	10	16	141	301	73	76	5	9.7	225	21	6.2
tracking	2	Amalka	Amalka2	2	20	9	2014	Svarovska_lipa	unknown	yes	hare	yes	19:31:24	00:04:12	486	yes	242	141	49	30	195	81	2.7	2.9	97	276	104	213	6	8.5	calm	0	17
tracking	3	Amalka	Amalka3	2	20	9	2014	Svarovska_lipa	unknown	yes	hare	yes	19:35:39	00:02:22	250	no	127	63	24	28	99	51	0.9	2.3	145	315	102	136	7	6.4	calm	0	16
tracking	4	Amalka	Amalka4	2	2	10	2014	pole Ptice	unknown	yes	hare	yes	19:16:53	00:01:50	407	no	221	50	28	10	157	50	9	11	260	55	232	182	13	11.3	calm	0	13
tracking	5	Amalka	Amalka5	2	2	10	2014	pole Ptice	unknown	yes	hare	yes	19:18:53	00:07:55	1058	no	629	185	105	105	324	185	1.2	4.1	332	58	243	276	8	5.6	calm	0	13
tracking	7	Amalka	Amalka7	2	9	10	2014	Prostredni_vrch	unknown	yes	unknown	yes	18:15:48	00:04:55	628	no	306	170	67	30	255	95	7	8	165	5	67	349	20	9.6	calm	0	22
tracking	8	Amalka	Amalka8	2	11	10	2014	Svarovska_lipa	unknown	yes	unknown	yes	12:55:48	00:10:55	1160	yes	577	305	119	65	465	285	1.4	5	15	9	132	219	14	6.8	calm	0	16
tracking	9	Amalka	Amalka9	2	25	1	2015	Ryman	unknown	yes	roe deer	yes	15:45:45	00:02:30	327	no	190	90	25	15	111	45	1.7	8	38	253	207	199	11	8.9	calm	0	2
tracking_SR	10	Amalka	Amalka10	2	25	1	2015	Ryman	unknown	yes	unknown	yes	16:34:10	n.m.	n.m.	no	n.m.	n.m.	n.m.	n.m.	n.m.	n.m.	0.8	2.6	221	253	78	24	33	6.6	calm	0	2
tracking	16	Amalka	Amalka16	3	21	2	2015	osada Rejnov	unknown	yes	unknown	yes	14:19:20	00:07:00	700	no	420	210	69	55	210	155	1.1	5	259	274	35	74	8	4.9	calm	0	11
tracking	20	Amalka	Amalka20	3	15	9	2015	Prostredni_vrch	unknown	yes	roe deer	yes	16:12:35	00:02:15	373	no	181	70	44	15	148	50	11	10	106	80	227	163	9	10.6	180	10	20
tracking	21	Amalka	Amalka21	3	15	9	2015	Prostredni_vrch	unknown	yes	unknown	yes	16:25:00	00:06:00	719	no	423	215	77	45	220	100	4.4	9	60	214	343	261	3	7.9	180	10	20
tracking	22	Amalka	Amalka22	3	15	9	2015	Prostredni_vrch	familiar	yes	unknown	yes	17:17:15	00:05:05	518	no	257	150	53	40	207	115	3.5	6	3	98	211	245	9	6.2	180	4	21
tracking	23	Amalka	Amalka23	3	27	11	2015	osada Rejnov	unknown	no	n.a.	n.a.	10:26:07	00:04:50	724	no	440	188	77	37	208	65	2.9	9	267	102	318	333	181	10.9	315	3	3
tracking	24	Amalka	Amalka24	3	27	11	2015	osada Rejnov	unknown	yes	roe deer	yes	10:37:32	00:14:30	1554	no	616	250	156	88	781	532	1.8	6	177	267	80	152	45	5.3	315	3	3
tracking	25	Amalka	Amalka25	4	5	4	2016	Prostredni_vrch	familiar	no	n.a.	n.a.	10:10:57	00:05:00	534	no	159	83	52	35	322	182	3.2	6	184	357	108	204	31	6.1	90	10	16
tracking_SR	25	Amalka	Amalka25	4	5	4	2016	Prostredni_vrch	familiar	no	n.a.	n.a.	10:10:57	n.m.	n.m.	yes	n.m.	n.m.	n.m.	n.m.	n.m.	n.m.	1.7	5	144	357	148	302	5	6.7	90	10	16
tracking	26	Amalka	Amalka26	4	5	4	2016	Prostredni_vrch	familiar	no	n.a.	n.a.	10:21:30	00:09:37	984	no	492	222	95	83	399	272	0.2	0.6	85	325	171	26	3	5.1	90	10	16
tracking	27	Amalka	Amalka27	4	10	4	2016	Stupno	unknown	no	n.a.	n.a.	10:06:40	00:03:48	397	no	199	120	40	30	158	78	1.8	9	87	87	193	177	13	7.3	315	5	8
tracking	28	Amalka	Amalka28	4	10	4	2016	Stupno	unknown	no	n.a.	n.a.	11:00:05	00:02:33	284	no	143	78	28	22	114	53	1.8	4.3	267	177	330	345	5	7.3	0	6	8
tracking	29	Amalka	Amalka29	4	10	4	2016	Stupno	unknown	yes	roe deer	yes	12:18:03	00:08:15	827	no	403	177	88	105	337	213	0	7	145	267	177	215	12	5.3	0	6	9
tracking	31	Amalka	Amalka31	4	11	4	2016	Ryman pole	unknown	no	n.a.	n.a.	10:21:52	00:04:10	365	no	184	138	35	25	146	87	1	3	211	159	348	46	25	6.2	270	3	7
tracking	32	Amalka	Amalka32	4	5	9	2016	Prostredni_vrch	familiar	yes	unknown	yes	11:38:12	00:04:05	463	no	177	65	44	33	222	135	1.7	4.3	70	267	110	257	9	5.9	270	16	17
tracking	33	Amalka	Amalka33	4	12	9	2016	Prostredni_vrch	familiar	yes	unknown	yes	08:44:02	00:05:53	567	no	285	165	63	45	220	143	3	3.9	173	325	145	107	17	5.5	calm	0	21
tracking	35	Amalka	Amalka35	4	12	9	2016	Prostredni_vrch	familiar	yes	unknown	yes	08:59:00	00:03:30	383	no	208	122	35	23	139	65	3.3	4.3	63	229	11	319	17	7.6	calm	0	21
tracking	1	Figy	Figy1	2	7	3	2015	Prostredni_vrch	unknown	no	n.a.	n.a.	17:29:26	00:21:55	2264	yes	1325	770	227	205	713	340	1.1	2.4	55	262	318	259	25	7.4	calm	0	11
tracking	3	Figy	Figy3	2	8	9	2015	Ryman	unknown	no	n.a.	n.a.	08:33:30	00:05:20	473	no	195	150	48	40	230	130	2.8	3.4	210	190	38	293	8	6.2	270	12	10
tracking	4	Figy	Figy4	2	11	9	2015	Ryman	unknown	no	n.a.	n.a.	08:52:45	00:04:55	501	no	250	120	54	45	197	130	0.9	1.2	229	103	316	43	25	5.2	calm	0	10
tracking	8	Figy	Figy8	3	22	9	2015	Prostredni_vrch	unknown	no	n.a.	n.a.	10:15:09	00:09:05	639	no	258	255	66	75	315	215	0.5	3.5	125	168	17	72	16	3.4	180	9	14
tracking	9	Figy	Figy9	3	22	9	2015	Prostredni_vrch	unknown	no	n.a.	n.a.	10:30:44	00:13:15	1116	no	558	360	121	160	437	275	0.9	3	305	75	201	334	11	4.8	135	17	14
tracking	10	Figy	Figy10	3	24	9	2015	Ryman	unknown	no	n.a.	n.a.	10:50:25	00:05:50	606	yes	373	235	59	35	174	80	2.6	10	233	231	7	18	21	7.4	270	4	12
tracking	11	Figy	Figy11	3	27	9	2015	Ptice_vysilac	unknown	yes	roe deer	no	17:31:20	00:03:10	419	no	214	100	38	30	167	60	1.2	2	282	227	34	337	37	8.8	0	14	13
tracking	12	Figy	Figy12	3	2	10	2015	Tmavak	unknown	no	n.a.	n.a.	14:44:00	00:02:10	460	no	264	70	50	20	145	40	1.5	12	87	233	44	227	11	12.2	90	10	17
tracking	15	Figy	Figy15	3	6	10	2015	Svarovska_lipa	unknown	no	n.a.	n.a.	10:14:05	00:02:25	305	yes	123	65	24	25	157	55	1.7	2.7	87	191	44	89	15	9.1	90	4	12
tracking	16	Figy	Figy16	3	6	10	2015	Svarovska_lipa	unknown	yes	roe deer	no	10:24:00	00:06:35	600	no	249	135	60	65	291	195	0.7	2	305	46	248	189	17	5.4	90	4	12
tracking	17	Figy	Figy17	3	6	10	2015	Svarovska_lipa	unknown	no	n.a.	n.a.	10:39:55	00:06:45	555	no	277	225	56	40	222	140	2.9	6	195	97	318	267	7	5.8	90	4	12
tracking	20	Figy	Figy20	3	10	11	2015	Prostredni_vrch	unknown	no	n.a.	n.a.	11:05:03	00:11:10	1000	no	420	265	103	90	515	315	0	2.9	267	145	291	98	22	5.7	270	7	15
tracking	23	Figy	Figy23	3	20	11	2015	Svarovska_lipa	familiar	no	n.a.	n.a.	10:00:03	00:16:32	1828	no	915	392	190	265	723	335	2.9	9	229	246	26	356	17	5.9	225	4	7
tracking	6	Hurvinek	Hurvinek6	4	25	12	2014	Prostredni_vrch	unknown	no	n.a.	n.a.	15:12:25	00:04:15	381	no	187	115	38	50	157	90	0.4	1.7	330	275	166	229	15	5.1	calm	0	4.5
tracking	9	Hurvinek	Hurvinek9	4	25	12	2014	Prostredni_vrch	unknown	no	n.a.	n.a.	15:40:05	00:03:55	331	no	126	95	38	30	168	110	0.5	8	327	322	125	180	47	5.7	calm	0	3.8
tracking	10	Hurvinek	Hurvinek10	4	25	12	2014	louka P. vrch	unknown	no	n.a.	n.a.	16:14:10	00:03:05	327	no	134	80	34	25	160	80	2.5	5	299	8	193	257	4	7.5	calm	0	3.8
tracking	14	Hurvinek	Hurvinek14	4	20	1	2015	Prostredni_vrch	familiar	yes	roe deer	no	15:25:25	00:14:25	1288	yes	794	555	126	85	368	225	0	8	347	38	270	46	19	5.7	calm	0	1.5
tracking	15	Hurvinek	Hurvinek15	5	24	1	2015	Prostredni_vrch	familiar	yes	roe deer	no	13:50:30	00:30:40	3237	no	1285	670	321	200	1631	970	5	7	267	351	99	335	14	6.1	calm	0	0.1
tracking	19	Hurvinek	Hurvinek19	5	17	2	2015	Prostredni_vrch	familiar	yes	unknown	yes	10:08:05	00:02:50	328	no	136	70	40	30	152	70	7	16	85	166	313	353	19	8.2	calm	0	-1.4
tracking	21	Hurvinek	Hurvinek21	5	17	2	2015	Prostredni_vrch	familiar	no	n.a.	n.a.	10:25:10	00:06:05	939	no	476	195	81	35	383	135	4.1	9	293	283	302	170	12	10.1	calm	0	-0.5
tracking	22	Hurvinek	Hurvinek22	5	17	2	2015	Prostredni_vrch	familiar	yes	boar	no	10:58:50	00:02:40	343	no	179	75	18	15	147	70	1.7	9	0.6	242	43	334	37	7.5	calm	0	0.3
tracking	24	Hurvinek	Hurvinek24	5	22	2	2015	Prostredni_vrch	familiar	no	n.a.	n.a.	11:43:45	00:04:10	691	no	414	140	63	40	213	70	7	10	117	244	346	262	11	10.1	calm	0	3.1
tracking	25	Hurvinek	Hurvinek25	5	22	2	2015	Prostredni_vrch	familiar	yes	roe deer	no	12:03:05	00:06:30	837	yes	482	235	77	45	278	110	2.5	9	105	178	302	291	21	8.3	calm	0	3.4
tracking	26	Hurvinek	Hurvinek26	5	6	7	2015	Prostredni_vrch	familiar	yes	roe deer	no	11:30:19	00:03:20	393	no	192	95	38	25	162	80	1.7	9	104	29	213	289	14	7.4	calm	0	25.3
tracking	27	Hurvinek	Hurvinek27	5	1	9	2015	Svarovska_lipa	unknown	no	n.a.	n.a.	08:09:45	00:05:40	661	no	323	160	66	60	271	120	0.9	2.8	248	303	112	226	20	7.5	180	2	23.3
tracking	29	Hurvinek	Hurvinek29	5	2	9	2015	Prostredni_vrch	familiar	no	n.a.	n.a.	08:12:19	00:04:35	456	no	268	140	43	40	144	95	1.9	5	267	169	223	100	14	5	315	8	14.6
tracking	30	Hurvinek	Hurvinek30	5	8	9	2015	Ryman	unknown	no	n.a.	n.a.	08:11:34	00:01:45	274	no	114	40	24	15	137	50	3.9	6	69	153	300	294	8	9.9	270	12	10.2
tracking	32	Hurvinek	Hurvinek32	5	8	9	2015	Ryman	unknown	no	n.a.	n.a.	08:51:14	00:04:50	590	yes	298	150	56	40	237	100	2.2	2.9	310	231	34	187	7	8.2	270	12	10.2
tracking	33	Hurvinek	Hurvinek33	5	8	9	2015	Ryman	unknown	no	n.a.	n.a.	09:12:54	00:04:30	527	no	268	140	51	30	208	100	0	5	255	73	299	138	10	7.4	270	14	10.8
tracking	35	Hurvinek	Hurvinek35	5	12	9	2015	Ryman	unknown	yes	roe deer	no	13:32:59	00:06:50	737	no	443	265	71	55	225	90	2.3	5	67	328	318	104	12	8.2	135	5	19.9
tracking	36	Hurvinek	Hurvinek36	5	12	9	2015	Ryman	unknown	yes	roe deer	no	13:43:24	00:03:30	339	yes	133	100	32	25	172	85	1.5	9	96	5	177	253	34	7.3	135	5	19.9
tracking	38	Hurvinek	Hurvinek38	5	15	9	2015	Prostredni_vrch	familiar	no	n.a.	n.a.	16:24:54	00:04:50	617	no	205	110	44	25	367	155	2.9	9	38	242	25	267	13	8.9	180	10	19.8
tracking	39	Hurvinek	Hurvinek39	5	15	9	2015	Prostredni_vrch	familiar	no	n.a.	n.a.	17:17:39	00:04:30	608	no	223	110	66	25	319	135	4.1	12	69	54	206	247	12	8.7	135	3	20.1
tracking	41	Hurvinek	Hurvinek41	5	16	9	2015	Prostredni_vrch	familiar	yes	roe deer	no	10:28:49	00:04:15	483	no	194	70	22	20	269	135	1.9	6	32	202	130	141	10	8.5	135	13	18.2
tracking	44	Hurvinek	Hurvinek44	5	27	11	2015	osada Rejnov	unknown	yes	roe deer	no	10:36:48	00:17:57	1988	no	995	417	189	133	833	527	2.8	3.4	177	115	69	30	14	5.8	315	3	2.5
tracking	49	Hurvinek	Hurvinek49	5	31	12	2015	Prostredni_vrch	familiar	no	n.a.	n.a.	16:02:45	00:03:07	454	no	228	97	46	28	180	62	0	5	210	145	341	309	12	10.1	135	6	-1.5
tracking	51	Hurvinek	Hurvinek51	5	18	1	2016	Svarovska_lipa	unknown	no	n.a.	n.a.	15:05:50	00:13:05	1674	no	840	375	164	70	669	340	2.8	7	357	145	320	6	31	7.4	calm	0	5.1
tracking	53	Hurvinek	Hurvinek53	6	5	4	2016	Svarovska_lipa	familiar	no	n.a.	n.a.	10:21:27	00:02:35	460	no	227	70	48	23	184	62	6	6	73	357	164	149	197	10.2	calm	0	6.3
tracking	62	Hurvinek	Hurvinek62	7	4	3	2017	Brezina	unknown	yes	roe deer	no	09:53:40	00:06:38	1049	no	520	205	108	35	422	158	5	10	291	177	25	337	3	10.9	calm	0	4
tracking	63	Hurvinek	Hurvinek63	7	8	3	2017	Stupno	unknown	no	n.a.	n.a.	16:16:55	00:03:20	356	no	174	110	33	30	149	60	2.7	4.1	33	44	309	235	7	8.5	225	16	6
tracking	3	Kacka	Kacka3	2	3	3	2015	Svarovska_lipa	unknown	no	n.a.	n.a.	16:36:20	00:04:05	816	no	415	125	74	25	326	95	5	15	316	219	316	322	7	12.9	calm	0	9.3
tracking	4	Kacka	Kacka4	2	7	3	2015	Prostredni_vrch	unknown	no	n.a.	n.a.	17:22:15	00:02:40	342	no	170	85	31	20	139	55	3.2	8	68	248	25	298	36	9.1	calm	0	10.9
tracking	6	Kacka	Kacka6	3	1	9	2015	Svarovska_lipa	unknown	yes	hare	yes	08:18:09	00:06:25	544	no	274	185	56	50	215	150	1	1.9	200	334	140	353	5	5	calm	0	23
tracking	7	Kacka	Kacka7	3	2	9	2015	Prostredni_vrch	unknown	no	n.a.	n.a.	08:13:30	00:03:40	347	no	140	80	33	30	175	110	1.4	3.3	305	130	220	301	5	5.6	315	7	15
tracking	12	Kacka	Kacka12	3	16	9	2015	Prostredni_vrch	unknown	yes	roe deer	yes	10:29:25	00:03:30	312	no	192	120	32	35	87	55	0.9	6	286	226	96	108	15	5	135	13	18
tracking	14	Kacka	Kacka14	3	29	9	2015	Ryman pole	unknown	yes	roe deer	yes	17:03:37	00:04:19	752	no	376	136	76	27	301	96	3.4	8	345	216	270	160	10	11.4	45	11	15
tracking	17	Kacka	Kacka17	3	6	10	2015	Svarovska_lipa	unknown	no	n.a.	n.a.	10:14:24	00:02:20	335	yes	161	75	24	15	151	50	3.5	4.1	274	221	45	70	11	9.7	90	4	12
tracking_SR	18	Kacka	Kacka18	3	6	10	2015	Svarovska_lipa	unknown	yes	roe deer	yes	10:24:14	n.m.	n.m.	no	n.m.	n.m.	n.m.	n.m.	n.m.	n.m.	12	14	171	54	224	199	45	5	90	4	12
tracking	21	Kacka	Kacka21	3	10	11	2015	Prostredni_vrch	familiar	yes	roe deer	yes	10:22:17	00:09:00	1185	no	590	248	120	62	486	230	2.2	8	177	30	81	98	51	7.5	315	8	14
tracking	22	Kacka	Kacka22	3	10	11	2015	Prostredni_vrch	familiar	no	n.a.	n.a.	11:05:00	00:05:40	664	no	252	140	72	47	339	153	0	5	87	125	292	88	19	7.9	270	7	15
tracking	23	Kacka	Kacka23	3	21	11	2015	Ondrejov	unknown	no	n.a.	n.a.	09:54:57	00:04:23	358	no	181	175	33	18	143	70	1.8	7	235	159	46	48	5	7.2	270	7	6
tracking	25	Kacka	Kacka25	3	27	11	2015	Svarovska_lipa	unknown	yes	roe deer	yes	10:37:35	00:13:52	1502	no	609	242	156	93	736	497	0	2.8	267	267	79	85	5	5.3	315	3	3
tracking	26	Kacka	Kacka26	3	27	11	2015	Svarovska_lipa	familiar	no	n.a.	n.a.	10:58:52	00:12:03	896	no	624	395	91	68	181	260	1.8	6	357	357	98	271	12	3.8	calm	0	4
tracking	31	Kacka	Kacka31	4	19	7	2016	Stupno	unknown	yes	roe deer	yes	11:22:01	00:07:39	730	no	368	210	72	59	289	190	1	5	264	281	77	85	38	5.7	0	7	28
tracking	32	Kacka	Kacka32	4	19	7	2016	Stupno	unknown	no	n.a.	n.a.	12:08:51	00:03:49	320	no	224	177	31	28	66	24	0.8	2.3	105	199	355	301	5	5.6	0	7	27
tracking	34	Kacka	Kacka34	4	2	8	2016	Stupno	unknown	yes	hare	yes	14:39:05	00:04:50	493	no	246	130	50	42	197	118	0.8	0.9	33	160	172	201	9	6.4	180	4	20
tracking	35	Kacka	Kacka35	4	2	8	2016	Stupno	unknown	yes	unknown	yes	15:08:25	00:03:42	354	no	176	107	36	30	141	85	0.8	3.3	307	177	328	310	11	5.7	180	4	19
tracking	36	Kacka	Kacka36	4	10	8	2016	Kokotske_rybniky	unknown	yes	roe deer	yes	13:13:25	00:04:22	425	no	172	102	42	40	210	120	1.5	3	302	30	173	128	51	5.9	270	5	18
tracking	37	Kacka	Kacka37	4	10	8	2016	Kokotske_rybniky	unknown	no	n.a.	n.a.	13:25:55	00:03:10	331	no	167	105	33	30	132	55	2	3.7	345	210	263	106	28	7.2	270	5	18
tracking	38	Kacka	Kacka38	4	10	8	2016	Kokotske_rybniky	unknown	no	n.a.	n.a.	13:45:55	00:04:00	388	yes	158	90	41	32	191	118	0.5	1.7	42	109	305	275	22	5.5	225	6	20
tracking	40	Kacka	Kacka40	4	10	8	2016	Kokotske_rybniky	unknown	yes	roe deer	yes	14:59:05	00:06:17	545	yes	164	85	53	50	329	242	1.5	3.2	351	195	80	236	8	5.1	0	27	11
tracking	43	Kacka	Kacka43	4	15	1	2017	Prostredni_vrch	familiar	yes	hare	yes	13:51:58	00:04:00	408	no	206	107	41	43	161	90	1.7	7	190	30	169	203	16	6	270	22	1
tracking	4	Pecka	Pecka4	1	5	10	2016	Svarovska_lipa	unknown	yes	roe deer	yes	11:01:58	00:03:57	559	no	381	165	60	27	118	45	3.1	7	84	87	333	303	13	9.1	0	27	7
tracking	5	Pecka	Pecka5	1	5	10	2016	Svarovska_lipa	unknown	no	n.a.	n.a.	11:09:43	00:06:22	717	no	503	282	72	45	142	55	0.8	4.3	32	60	298	239	19	9.1	0	27	7
tracking	6	Pecka	Pecka6	1	5	10	2016	Svarovska_lipa	unknown	no	n.a.	n.a.	11:27:23	00:03:27	265	no	159	140	27	20	80	47	2.4	3.5	305	318	101	11	12	5.9	0	28	8
tracking	8	Pecka	Pecka8	2	3	1	2017	Svarovska_lipa	unknown	yes	unknown	yes	14:40:20	00:24:35	2348	no	935	508	238	175	1175	792	3	5	265	177	5	296	55	5.4	225	22	1
tracking	9	Pecka	Pecka9	2	11	2	2017	Prostredni_vrch	unknown	no	n.a.	n.a.	14:11:58	00:05:10	684	yes	411	187	67	45	202	78	4.2	6	131	332	105	60	27	8	135	6	0
tracking	10	Pecka	Pecka10	2	11	2	2017	Prostredni_vrch	unknown	no	n.a.	n.a.	14:28:50	00:06:08	615	no	181	90	63	60	372	218	2.1	6	91	30	174	184	14	5.6	135	6	0
tracking	12	Pecka	Pecka12	2	9	3	2017	Ryman	unknown	yes	hare	yes	10:56:50	00:03:48	490	no	191	98	52	25	247	105	5	11	48	357	114	256	13	8.3	270	11	9
tracking	13	Pecka	Pecka13	2	9	3	2017	Ryman	unknown	yes	hare	yes	11:01:20	00:02:33	406	no	207	80	39	23	161	50	4.1	6	98	267	91	145	19	11	270	11	9
tracking	15	Pecka	Pecka15	2	9	3	2017	Ryman	unknown	yes	unknown	yes	11:14:28	00:03:37	675	yes	338	105	65	40	271	72	1.1	5	14	240	100	228	16	11.9	270	11	9
tracking_SR	16	Pecka	Pecka16	2	9	3	2017	Ryman	unknown	yes	roe deer	yes	11:28:43	n.m.	n.m.	no	n.m.	n.m.	n.m.	n.m.	n.m.	n.m.	4.5	5	360	105	294	358	2	9	270	15	10
tracking	18	Pecka	Pecka18	2	9	3	2017	Ryman	unknown	yes	unknown	yes	12:16:38	00:06:07	724	no	357	160	75	55	291	152	1.6	5	69	325	220	227	19	6.8	270	14	10
tracking	1	Punta	Punta1	1	31	12	2015	Prostredni_vrch	unknown	yes	boar	yes	15:48:25	00:05:47	820	no	412	160	78	60	329	127	4.3	6	246	165	32	345	30	9.2	180	1	-1
tracking	2	Punta	Punta2	1	31	12	2015	Prostredni_vrch	unknown	yes	boar	no	15:55:07	00:04:18	583	no	288	133	55	30	240	95	0	3.4	195	144	16	66	75	8.7	135	6	-1.5
tracking	5	Punta	Punta5	1	14	5	2016	Zdar	unknown	yes	roe deer	yes	10:52:20	00:09:27	1254	no	755	397	123	43	376	127	3.4	16	126	278	192	298	107	10.7	270	21	15
tracking	6	Punta	Punta6	2	21	7	2016	Brezina	unknown	yes	roe deer	yes	09:17:40	00:05:43	709	no	288	138	70	27	352	178	2.2	3.5	49	177	96	165	8	7.5	90	4	24
tracking	7	Punta	Punta7	2	21	7	2016	Brezina	unknown	yes	roe deer	yes	09:23:48	00:02:00	262	no	134	57	32	18	96	45	2	4	300	195	68	82	9	7.6	90	4	24
tracking	9	Punta	Punta9	2	21	7	2016	Brezina	unknown	yes	roe deer	yes	10:03:43	00:03:32	621	no	307	92	60	28	256	92	2.9	7	136	343	44	287	16	9.8	135	5	23
tracking	10	Punta	Punta10	2	5	9	2016	Prostredni_vrch	unknown	yes	unknown	yes	11:38:15	00:03:58	489	no	247	95	48	35	195	108	4.2	6	109	267	110	144	22	6.2	270	27	17
tracking	11	Punta	Punta11	2	5	9	2016	Prostredni_vrch	unknown	no	n.a.	n.a.	11:50:50	00:02:30	257	no	79	40	27	23	151	87	1.8	2.6	183	267	84	270	22	6.2	315	17	17
tracking	13	Punta	Punta13	2	8	9	2016	Brezina	unknown	no	n.a.	n.a.	13:27:08	00:03:20	317	no	163	105	33	42	120	53	3	5	247	133	330	326	7	5.9	45	6	27
tracking	14	Punta	Punta14	2	26	9	2016	Brezina	familiar	no	n.a.	n.a.	10:07:27	00:01:25	292	no	143	48	33	12	116	25	3.2	8	155	145	330	351	15	16.5	calm	0	11
tracking	15	Punta	Punta15	2	26	9	2016	Brezina	unknown	no	n.a.	n.a.	10:57:32	00:03:25	435	no	175	68	44	25	215	112	3.4	6	259	210	22	59	10	6.9	calm	0	16
tracking	16	Punta	Punta16	2	3	1	2017	Svarovska_lipa	unknown	yes	unknown	yes	14:03:00	00:03:28	462	no	273	118	44	32	145	58	2.2	9	152	219	5	309	84	8.9	270	27	1
tracking	17	Punta	Punta17	2	3	1	2017	Svarovska_lipa	unknown	yes	unknown	yes	14:19:50	00:04:43	762	no	377	118	80	45	304	120	7	8	175	210	39	90	4	7.6	270	27	1
tracking	18	Punta	Punta18	2	3	1	2017	Svarovska_lipa	unknown	yes	unknown	yes	14:40:10	00:28:00	2906	no	1464	718	287	207	1156	755	1.5	2	145	177	12	160	49	5.4	225	22	1
tracking	21	Punta	Punta21	2	17	2	2017	Stupno	unknown	yes	roe deer	yes	15:18:50	00:02:40	437	no	181	83	37	17	148	60	2.4	5	85	221	77	133	36	9.1	225	23	4.8
tracking	22	Punta	Punta22	2	1	3	2017	Stupno	unknown	no	n.a.	n.a.	14:53:28	00:02:17	259	no	100	72	27	15	130	50	2.8	7	340	230	145	267	8	9.4	270	34	5.8
tracking_SR	23	Punta	Punta23	2	1	3	2017	Stupno	unknown	yes	roe deer	yes	15:53:25	n.m.	n.m.	no	n.m.	n.m.	n.m.	n.m.	n.m.	n.m.	10	10	68	340	76	76	31	7.9	225	37	6.6
tracking	25	Punta	Punta25	2	1	3	2017	Stupno	unknown	yes	roe deer	yes	16:55:30	00:01:45	236	no	122	60	21	15	92	30	3.2	3.9	155	119	321	182	4	10.1	225	18	6
tracking	1	Terezka	Terezka1	1	11	10	2015	Svarovska_lipa	unknown	yes	boar	yes	13:28:43	00:03:37	360	no	146	90	34	20	180	107	2.9	9	145	154	323	241	13	6.1	225	11	17
tracking	5	Terezka	Terezka5	1	25	12	2015	Prostredni_vrch	unknown	yes	roe deer	yes	15:35:22	00:19:53	1966	yes	981	533	198	155	786	505	0	5	210	357	172	75	46	5.5	225	4	11
tracking	7	Terezka	Terezka7	1	25	12	2015	Prostredni_vrch	unknown	yes	roe deer	yes	16:09:02	00:24:23	1266	yes	756	720	125	175	384	568	0	5	87	30	212	236	74	2.5	225	6	11
tracking	9	Terezka	Terezka9	2	14	5	2016	Zdar	unknown	yes	roe deer	yes	10:53:05	00:03:47	435	no	178	70	46	72	210	85	0.3	6	70	229	354	334	77	6.1	270	21	15
tracking	10	Terezka	Terezka10	2	14	5	2016	Zdar	unknown	no	n.a.	n.a.	13:28:15	00:04:25	467	no	181	145	35	22	152	98	1.9	2.8	304	195	17	86	11	5.5	270	21	15
tracking	11	Terezka	Terezka11	2	14	5	2016	Zdar	unknown	no	n.a.	n.a.	13:35:25	00:03:47	327	no	169	115	31	27	127	85	2.8	5	229	324	123	118	6	5.1	270	21	15
tracking	25	Terezka	Terezka25	2	21	7	2016	Brezina	unknown	no	n.a.	n.a.	09:00:12	00:03:00	617	no	310	96	64	16	243	68	0.8	14	85	87	238	267	40	13.2	90	4	24
tracking	26	Terezka	Terezka26	2	21	7	2016	Brezina	unknown	yes	roe deer	yes	09:06:54	00:06:23	637	no	443	255	64	66	129	62	0.5	2.4	135	87	250	172	17	6.7	90	4	24
tracking	27	Terezka	Terezka27	2	21	7	2016	Brezina	unknown	yes	roe deer	yes	09:13:33	00:04:23	646	no	255	109	67	36	322	118	0.9	1.4	286	42	211	87	10	9.4	90	4	24
tracking	28	Terezka	Terezka28	2	21	7	2016	Brezina	unknown	yes	roe deer	yes	09:19:06	00:04:30	684	no	274	78	67	42	343	150	1.5	5	85	224	119	163	15	7.8	90	4	24
tracking	29	Terezka	Terezka29	2	21	7	2016	Brezina	unknown	yes	roe deer	yes	09:26:00	00:05:16	567	no	280	192	59	24	226	100	1.6	7	26	275	105	144	52	8.4	90	4	24
tracking	31	Terezka	Terezka31	2	21	7	2016	Brezina	unknown	yes	roe deer	no	10:04:00	00:03:41	517	no	211	76	53	33	252	112	1.5	9	167	224	37	358	42	8.1	135	5	23
tracking	32	Terezka	Terezka32	2	21	7	2016	Brezina	unknown	no	n.a.	n.a.	10:13:04	00:03:47	328	yes	132	104	32	34	165	89	0.8	3.4	70	152	342	248	22	6.5	135	5	23
tracking	34	Terezka	Terezka34	2	11	8	2016	Osada Rejnov	unknown	no	n.a.	n.a.	09:07:55	00:02:55	294	no	148	97	29	28	117	50	2	7	337	240	69	345	3	8.2	270	12	12
tracking	35	Terezka	Terezka35	2	11	8	2016	Osada Rejnov	unknown	no	n.a.	n.a.	09:37:00	00:03:32	337	no	167	112	32	23	136	77	2.9	3	170	145	287	96	3	6.4	270	8	13
tracking	37	Terezka	Terezka37	2	11	8	2016	Osada Rejnov	unknown	no	n.a.	n.a.	10:06:55	00:04:17	420	no	167	112	42	38	211	107	1.4	3.4	303	267	124	284	6	6.7	315	8	14
tracking	38	Terezka	Terezka38	2	11	8	2016	Osada Rejnov	unknown	no	n.a.	n.a.	10:26:45	00:04:27	522	no	261	127	50	60	212	80	0.2	0.7	341	221	75	139	62	7.8	225	10	15
tracking	39	Terezka	Terezka39	2	11	8	2016	Osada Rejnov	unknown	no	n.a.	n.a.	10:55:17	00:05:15	563	no	225	123	56	42	281	150	2.7	3.7	236	325	154	57	18	6.8	315	11	14
tracking	40	Terezka	Terezka40	2	11	8	2016	Osada Rejnov	unknown	no	n.a.	n.a.	11:07:25	00:03:32	394	no	159	92	38	30	197	90	1	2.4	355	357	117	244	11	7.7	315	11	14
tracking	42	Terezka	Terezka42	2	8	9	2016	Brezina	unknown	yes	hare	yes	12:16:20	00:05:00	380	no	303	235	40	42	37	23	1	2.6	61	210	92	128	21	4.7	180	14	26
tracking	44	Terezka	Terezka44	2	8	9	2016	Brezina	unknown	no	n.a.	n.a.	13:08:02	00:10:28	958	no	579	365	94	110	285	152	1	1.4	63	357	191	73	5	5.3	180	10	26
tracking	45	Terezka	Terezka45	2	8	9	2016	Brezina	unknown	no	n.a.	n.a.	13:27:02	00:03:30	366	yes	176	113	35	30	154	67	1.6	3	66	145	325	280	61	8	180	10	26
tracking	49	Terezka	Terezka49	2	19	9	2016	Prostredni_vrch	unknown	yes	fox	yes	09:44:52	00:03:48	370	no	185	105	36	33	149	90	1.2	5	57	345	165	213	10	5.7	0	14	12
tracking	51	Terezka	Terezka51	2	19	9	2016	Prostredni_vrch	unknown	no	n.a.	n.a.	09:58:55	00:02:52	260	no	102	75	27	30	132	67	1.4	4	114	177	333	284	7	6.5	315	8	12
tracking	54	Terezka	Terezka54	2	17	2	2017	Stupno	unknown	yes	unknown	yes	14:17:53	00:09:02	1390	yes	553	185	140	70	696	287	2.8	5	83	165	95	203	28	8.5	225	21	6
tracking	3	Benda	Benda3	1	22	8	2016	Luckovice	unknown	no	n.a.	n.a.	19:46:22	00:03:08	260	no	107	55	25	25	128	108	2.9	3	116	87	263	148	4	4.2	calm	0	21
tracking	4	Benda	Benda4	1	12	9	2016	Prostredni_vrch	unknown	no	n.a.	n.a.	08:51:25	00:03:27	303	no	149	105	29	20	125	82	1.6	2	170	66	239	144	13	5.4	calm	0	21
tracking	6	Benda	Benda6	1	22	11	2016	Svarovska_lipa	unknown	no	n.a.	n.a.	11:57:38	00:02:07	248	no	125	57	27	20	97	50	0.4	0.6	174	159	14	125	6	6.8	180	1	8
tracking_SR	8	Benda	Benda8	1	16	2	2017	Ryman	unknown	yes	roe deer	yes	10:11:48	n.m.	n.m.	yes	n.m.	n.m.	n.m.	n.m.	n.m.	n.m.	6	20	345	145	44	26	25	8.5	225	2	5
tracking_SR	9	Benda	Benda9	1	16	2	2017	Ryman	unknown	yes	hare	yes	10:30:03	n.m.	n.m.	no	n.m.	n.m.	n.m.	n.m.	n.m.	n.m.	3.4	12	145	289	105	129	18	8.7	270	8	5
tracking	10	Benda	Benda10	1	16	2	2017	Ryman	unknown	no	n.a.	n.a.	10:37:03	00:02:37	247	no	90	50	28	20	130	87	0	5	177	177	2	323	3	5.4	270	8	5
tracking	11	Benda	Benda11	1	16	2	2017	Ryman	unknown	no	n.a.	n.a.	10:45:55	00:03:40	421	yes	208	98	44	27	168	95	0	14	267	210	35	340	20	6.6	270	8	5
tracking	12	Benda	Benda12	1	16	2	2017	Ryman	unknown	no	n.a.	n.a.	10:52:18	00:04:32	604	no	301	145	60	30	244	97	0	6	313	267	50	15	5	9.1	270	8	5
tracking	13	Benda	Benda13	1	16	2	2017	Ryman	unknown	yes	roe deer	yes	11:31:20	00:04:43	547	no	272	133	55	37	220	113	0	4.3	87	357	261	257	5	6.6	270	6	8
tracking	15	Benda	Benda15	1	16	2	2017	Ryman	unknown	yes	roe deer	yes	11:50:53	00:06:07	740	yes	296	155	76	50	369	162	0	2.9	357	60	315	23	8	7.9	270	6	8
tracking	16	Benda	Benda16	1	5	3	2017	Ryman	unknown	yes	unknown	no	13:52:23	00:05:42	1051	yes	625	197	102	43	324	102	2.9	6	70	159	50	41	6	11.1	180	17	12
tracking	17	Benda	Benda17	1	5	3	2017	Ryman	unknown	no	n.a.	n.a.	14:18:18	00:06:47	734	no	368	185	72	92	295	130	0.1	1.9	177	145	7	6	4	7.5	225	11	11
tracking	18	Benda	Benda18	1	5	3	2017	Ryman	unknown	yes	roe deer	yes	14:28:48	00:10:27	1186	no	497	210	116	82	593	335	1.9	3.4	16	305	149	331	7	6.2	225	17	10
tracking	19	Benda	Benda19	1	5	3	2017	Ryman	unknown	no	n.a.	n.a.	14:43:55	00:07:38	649	no	324	213	64	85	261	160	0	1.1	177	229	14	314	6	5.6	225	17	10
tracking	21	Benda	Benda21	1	5	3	2017	Ryman	unknown	yes	roe deer	yes	15:19:48	00:10:27	1131	no	452	212	112	75	567	340	0.3	1.7	224	325	187	129	20	6	180	13	10
tracking	8	Vendulka	Vendulka8	10	2	8	2016	Brezina	unknown	no	n.a.	n.a.	15:08:18	00:03:32	412	no	209	212	40	28	164	72	2.9	3.8	191	210	338	19	21	7.7	180	4	20
tracking	9	Vendulka	Vendulka9	10	2	8	2016	Brezina	unknown	no	n.a.	n.a.	15:12:13	00:02:32	311	no	128	62	32	23	150	67	1.3	5	255	240	64	78	60	7.9	180	4	20
tracking	10	Vendulka	Vendulka10	10	4	8	2016	Prostredni_vrch	unknown	no	n.a.	n.a.	19:49:35	00:02:47	419	no	254	102	43	18	120	47	7	9	75	100	301	75	4	9.3	calm	0	28
tracking	13	Vendulka	Vendulka13	10	22	1	2017	Prostredni_vrch	unknown	yes	hare	yes	16:32:53	00:01:57	270	no	162	77	26	15	82	25	2.2	7	2	177	360	16	14	10.5	calm	0	-4
tracking	14	Vendulka	Vendulka14	10	12	2	2017	Prostredni_vrch	unknown	yes	roe deer	yes	12:59:33	00:04:55	586	no	229	132	57	20	299	143	0.9	5	236	313	119	39	21	7.7	135	9	1
tracking	15	Vendulka	Vendulka15	10	12	2	2017	Prostredni_vrch	unknown	no	n.a.	n.a.	13:08:03	00:02:02	294	no	145	57	31	18	119	47	2.8	5	259	229	81	177	6	8.6	135	9	1
tracking	18	Vendulka	Vendulka18	10	12	2	2017	Prostredni_vrch	unknown	yes	hare	yes	13:45:13	00:05:05	583	no	295	82	57	45	231	178	1.9	2.6	268	334	137	325	2	4.7	90	8	1
tracking	19	Vendulka	Vendulka19	10	5	3	2017	Ryman	unknown	yes	unknown	yes	13:52:25	00:02:33	495	no	250	73	46	22	198	58	2.9	7	235	156	24	80	22	11.5	225	11	11
tracking	20	Vendulka	Vendulka20	10	5	3	2017	Ryman	unknown	yes	roe deer	no	15:00:18	00:04:05	486	yes	290	125	42	30	156	90	0.9	6	356	87	341	346	18	6.1	180	13	10
tracking	21	Vendulka	Vendulka21	10	5	3	2017	Ryman	unknown	yes	roe deer	yes	15:19:45	00:10:33	902	no	363	150	88	78	451	405	0	4	98	305	201	251	16	4	180	13	10
tracking	22	Vendulka	Vendulka22	10	9	3	2017	Ryman	unknown	yes	hare	yes	11:00:20	00:04:38	637	no	314	133	67	35	257	110	3	8	99	267	147	10	7	6.3	270	11	9
tracking_SR	22	Vendulka	Vendulka22	10	9	3	2017	Ryman	unknown	yes	hare	yes	11:00:20	n.m.	n.m.	no	n.m.	n.m.	n.m.	n.m.	n.m.	n.m.	5	7	168	267	119	176	10	10.4	270	11	9
tracking	23	Vendulka	Vendulka23	10	9	3	2017	Ryman	unknown	yes	unknown	yes	11:38:10	00:02:33	439	yes	219	93	45	12	175	48	10	15	76	229	359	46	5	13.4	270	15	10
tracking	1	Dona	Dona1	4	15	9	2016	Fort	unknown	yes	unknown	yes	15:17:29	00:06:00	513	no	359	200	49	35	106	125	6	6	29	93	143	111	17	4.1	calm	0	22
tracking	9	Dona	Dona9	4	7	10	2016	Dlouhy_les	familiar	no	n.a.	n.a.	14:59:24	00:01:15	231	no	89	20	10	5	132	50	7	22	334	344	167	252	4	14.9	calm	0	9
tracking	15	Dona	Dona15	4	23	10	2016	Pankovo_pole	familiar	yes	unknown	yes	15:02:39	00:04:45	1300	no	539	130	120	30	604	125	4.3	8	259	248	41	60	4	17.3	calm	0	11
tracking	16	Dona	Dona16	4	23	10	2016	Pankovo_pole	familiar	yes	unknown	yes	15:11:04	00:03:40	553	no	223	85	56	20	274	115	3.2	16	105	146	257	353	19	8.8	calm	0	11
tracking_SR	17	Dona	Dona17	4	27	1	2017	Dlouhy_les	unknown	no	n.a.	n.a.	09:18:54	n.m.	n.m.	no	n.m.	n.m.	n.m.	n.m.	n.m.	n.m.	2.4	2.9	114	353	163	186	57	7.8	calm	0	6
tracking	18	Dona	Dona18	4	27	1	2017	Dlouhy_les	unknown	no	n.a.	n.a.	09:31:29	00:13:54	958	no	570	485	99	94	290	255	0.4	12	17	16	125	148	20	4.2	calm	0	6
tracking	19	Dona	Dona19	4	11	2	2017	Dlouhy_les	unknown	no	n.a.	n.a.	14:30:43	00:04:15	387	no	152	85	43	40	191	130	3.1	6	330	305	159	75	10	5.3	calm	0	4
tracking	21	Dona	Dona21	4	11	2	2017	Dlouhy_les	unknown	no	n.a.	n.a.	14:54:13	00:03:15	428	no	175	55	47	25	205	115	3	7	16	159	194	59	6	10.7	calm	0	4
tracking	1	Jeny	Jeny1	2	21	5	2016	Nad_rokli	familiar	yes	roe deer	no	14:18:07	00:03:55	472	no	233	100	47	30	193	105	0.8	5	156	112	305	306	87	6.6	calm	0	22
tracking	5	Jeny	Jeny5	2	28	7	2016	Dlouhy_les	familiar	yes	roe deer	no	14:06:47	00:07:50	476	no	186	175	52	70	237	225	1	2.2	209	311	38	211	5	3.7	calm	0	24
tracking	6	Jeny	Jeny6	2	28	7	2016	Dlouhy_les	familiar	yes	hare	yes	14:22:37	00:05:00	505	no	242	110	48	35	209	110	1.6	2.5	313	108	256	299	2	6.6	calm	0	24
tracking	8	Jeny	Jeny8	2	8	10	2016	Pankovo_pole	unknown	yes	roe deer	yes	10:07:24	00:03:20	414	no	213	105	37	25	164	70	4.3	8	149	91	249	267	29	8.2	calm	0	10
tracking	9	Jeny	Jeny9	2	8	10	2016	Pankovo_pole	unknown	no	n.a.	n.a.	10:11:44	00:01:40	208	no	83	40	21	15	105	45	2.4	9	277	263	73	149	5	8.4	calm	0	10
tracking	12	Jeny	Jeny12	2	12	2	2017	Dlouhy_les	familiar	no	n.a.	n.a.	09:50:48	00:08:05	450	no	136	140	43	65	270	280	0.6	3.5	65	173	250	98	16	3.5	calm	0	5
tracking	13	Jeny	Jeny13	2	12	2	2017	Dlouhy_les	familiar	no	n.a.	n.a.	09:59:43	00:08:30	539	no	332	330	52	45	156	135	1	3.9	59	72	312	332	4	5.7	calm	0	5
tracking	4	Kara	Kara4	3	19	6	2016	Dlouhy_les	familiar	no	n.a.	n.a.	14:04:52	00:01:40	219	no	104	30	21	15	107	55	2.4	5	259	190	8	240	13	7.1	calm	0	17
tracking	6	Kara	Kara6	3	19	6	2016	Dlouhy_les	familiar	no	n.a.	n.a.	14:25:07	00:04:15	361	no	165	130	32	30	149	70	1.2	1.4	94	19	165	32	2	6.7	calm	0	17
tracking	9	Kara	Kara9	3	27	7	2016	Dlouhy_les	familiar	no	n.a.	n.a.	14:16:37	00:03:30	298	no	146	100	30	40	122	70	0.8	1.7	12	14	138	78	9	5.9	calm	0	27
tracking	10	Kara	Kara10	3	27	7	2016	Dlouhy_les	familiar	no	n.a.	n.a.	14:27:57	00:02:15	235	no	96	50	23	25	116	45	0.4	0.6	198	282	115	155	18	6.9	calm	0	27
tracking	14	Kara	Kara14	3	16	9	2016	Dlouhy_les	familiar	no	n.a.	n.a.	17:31:44	00:08:30	1100	no	418	285	101	50	541	185	2.9	3.5	80	49	251	24	5	8.3	calm	0	22
tracking	16	Kara	Kara16	3	8	10	2016	Pankovo_pole	familiar	yes	roe deer	no	14:28:54	00:08:30	1200	no	593	245	121	35	464	185	4.2	12	5	32	214	212	54	9.2	calm	0	11
tracking	18	Kara	Kara18	3	8	10	2016	Pankovo_pole	familiar	no	n.a.	n.a.	15:03:24	00:04:05	590	no	247	75	57	25	284	145	3.4	10	62	304	174	309	4	8.6	calm	0	11
tracking	20	Kara	Kara20	3	14	10	2016	Pankovo_pole	familiar	yes	roe deer	yes	15:07:49	00:05:45	1000	no	616	225	102	35	317	85	2.3	9	44	300	350	250	72	12.8	calm	0	15
tracking	21	Kara	Kara21	3	14	10	2016	Pankovo_pole	familiar	no	n.a.	n.a.	15:17:04	00:01:05	234	no	117	25	17	10	99	30	1.8	16	113	77	286	354	4	13.6	calm	0	15
tracking	22	Kara	Kara22	3	14	10	2016	Pankovo_pole	familiar	no	n.a.	n.a.	15:18:14	00:03:05	291	no	139	95	34	20	119	70	2.7	8	337	251	67	100	18	6.2	calm	0	15
tracking	27	Kara	Kara27	3	24	10	2016	Kalberg	unknown	no	n.a.	n.a.	10:28:32	00:04:22	628	yes	373	164	65	31	191	67	1.4	13	360	57	147	182	40	10.4	calm	0	12
tracking	30	Kara	Kara30	3	24	10	2016	Kalberg	unknown	no	n.a.	n.a.	10:45:12	00:07:40	810	no	489	193	84	87	236	141	0.4	5	342	57	205	48	5	5.7	calm	0	12
tracking	32	Kara	Kara32	3	9	3	2017	Ded	unknown	no	n.a.	n.a.	14:22:58	00:03:55	436	no	222	140	44	20	185	75	1.8	7	216	235	88	45	21	10.1	calm	0	7
tracking	33	Kara	Kara33	3	9	3	2017	Ded	unknown	no	n.a.	n.a.	14:50:38	00:02:10	306	no	120	50	35	20	152	60	2.1	10	243	208	63	57	10	9.8	calm	0	7
tracking	36	Kara	Kara36	3	9	3	2017	Ded	unknown	no	n.a.	n.a.	15:34:38	00:05:55	586	no	344	205	59	60	183	90	0.6	7	233	135	281	53	23	6.6	calm	0	7
tracking	38	Kara	Kara38	3	11	3	2017	Koda	unknown	yes	boar	yes	10:32:13	00:03:05	618	no	306	95	64	25	248	65	1.2	15	345	346	228	178	20	13.5	calm	0	10
tracking	39	Kara	Kara39	3	11	3	2017	Koda	unknown	yes	roe deer	no	10:41:38	00:02:45	483	no	194	60	51	15	237	90	8	10	16	284	149	300	4	10.5	calm	0	10
tracking	41	Kara	Kara41	3	11	3	2017	Koda	unknown	no	n.a.	n.a.	10:52:53	00:03:55	681	no	405	130	61	20	217	85	2.3	10	133	305	234	225	2	9.6	calm	0	10
tracking	42	Kara	Kara42	3	11	3	2017	Koda	unknown	no	n.a.	n.a.	10:58:03	00:03:15	275	no	111	90	34	30	142	75	1.2	9	310	54	201	157	41	7.6	calm	0	10
tracking	43	Kara	Kara43	3	11	3	2017	Koda	unknown	yes	hare	yes	11:02:48	00:04:20	812	no	321	95	80	30	412	135	1.5	7	319	177	96	70	3	11	calm	0	10
tracking	2	Sara	Sara2	3	17	11	2015	Bohuslavice	familiar	no	n.a.	n.a.	09:49:27	00:10:05	1249	no	540	215	102	85	609	305	3.1	5	47	48	296	190	13	7.2	225	19	9
tracking	5	Sara	Sara5	4	15	8	2016	Rubinovice	familiar	no	n.a.	n.a.	13:26:02	00:02:55	285	no	130	75	27	25	129	75	4.1	5	51	98	247	152	6	5.6	315	15	22
tracking	5	Albi	Albi5	9	27	10	2014	Kokotske_rybniky	familiar	no	n.a.	n.a.	13:34:17	00:04:00	509	no	197	95	51	30	262	115	3.2	5	107	116	260	301	6	7.9	180	9	9
tracking	13	Albi	Albi13	9	4	11	2014	Ejpovice	familiar	no	n.a.	n.a.	16:16:07	00:02:15	281	no	141	65	24	25	116	45	0.3	3.3	311	313	160	143	20	8.7	calm	0	12
tracking	17	Albi	Albi17	9	9	11	2014	Polesi_haj 2	familiar	yes	roe deer	yes	15:53:12	00:19:10	2585	no	753	230	280	155	1553	765	4.3	5	172	332	256	64	6	7.2	315	3	8
tracking	21	Albi	Albi21	9	2	2	2015	Polesi_haj 1	familiar	yes	roe deer	yes	11:42:52	00:16:00	2067	no	1034	515	208	140	825	305	0.6	2.8	250	109	344	331	21	7.1	270	9	2
tracking	22	Albi	Albi22	9	8	3	2015	Kokotske_rybniky	familiar	yes	roe deer	yes	14:13:47	00:10:35	1505	no	752	290	144	50	611	295	6	6	49	87	192	147	8	7.8	225	9	14
tracking	24	Albi	Albi24	10	19	4	2015	Ryman	unknown	no	n.a.	n.a.	11:51:37	00:09:30	986	no	484	290	112	80	389	200	1.8	6	221	87	8	54	22	6.5	calm	0	16
tracking	27	Albi	Albi27	10	21	6	2015	Milcice	unknown	no	n.a.	n.a.	10:08:27	00:04:05	461	no	178	70	51	50	232	125	1	2.6	10	267	82	173	5	6.1	270	12	12
tracking	33	Albi	Albi33	10	27	6	2015	Krtin	unknown	no	n.a.	n.a.	14:43:47	00:03:20	424	no	211	95	42	25	170	80	4.4	6	72	23	214	116	12	7.6	315	1	17
tracking_SR	36	Albi	Albi36	10	27	6	2015	Krtin	unknown	yes	roe deer	yes	15:38:22	n.m.	n.m.	no	n.m.	n.m.	n.m.	n.m.	n.m.	n.m.	2.1	5	66	88	78	112	16	8.3	calm	0	18
tracking	42	Albi	Albi42	10	25	12	2015	Prostredni_vrch	unknown	no	n.a.	n.a.	15:23:58	00:09:08	1355	no	680	247	129	87	546	214	1.8	7	267	157	316	66	38	8.1	225	4	11
tracking	49	Albi	Albi49	10	30	1	2016	Bolevec	unknown	no	n.a.	n.a.	14:37:17	00:03:15	426	no	257	110	41	23	128	62	3	8	318	306	45	357	15	7.4	180	17	9
tracking	50	Albi	Albi50	10	30	1	2016	Bolevec	unknown	no	n.a.	n.a.	15:16:10	00:07:07	958	no	384	160	101	40	473	227	5	12	155	138	241	160	3	7.7	225	14	8
tracking	64	Albi	Albi64	10	3	4	2016	Polesi_haj	familiar	yes	roe deer	yes	10:48:07	00:06:45	955	no	758	320	95	45	103	40	3.6	7	174	49	240	197	7	8.4	270	5	12
tracking	78	Albi	Albi78	11	17	7	2016	Prostredni_vrch	familiar	no	n.a.	n.a.	11:51:55	00:02:58	349	no	174	80	38	28	137	70	2.1	6	205	159	181	258	6	6.7	0	7	20
tracking	86	Albi	Albi86	11	22	7	2016	Kokotske_rybniky	familiar	yes	roe deer	yes	19:44:17	00:05:10	443	no	175	110	46	30	223	170	1.2	4.1	192	171	333	324	4	5.2	180	4	25
tracking	98	Albi	Albi98	11	18	9	2016	Kokotske_rybniky	familiar	yes	roe deer	yes	10:52:44	00:08:54	989	no	594	314	99	86	295	134	1.8	5	54	198	68	252	14	7	90	10	17
tracking	104	Albi	Albi104	11	26	9	2016	Stupno	unknown	no	n.a.	n.a.	11:39:08	00:03:27	326	yes	133	110	30	30	161	67	1.6	7	225	230	8	88	19	8.2	calm	0	15
tracking	105	Albi	Albi105	11	26	9	2016	Stupno	unknown	no	n.a.	n.a.	11:43:53	00:05:20	402	yes	196	172	42	45	164	103	1.5	1.8	351	267	107	184	16	5.7	calm	0	15
tracking	107	Albi	Albi107	11	9	10	2016	Polesi_haj	familiar	yes	roe deer	yes	16:59:01	00:05:25	757	no	327	125	76	60	355	140	2.1	6	310	22	223	170	9	7.9	45	10	10
tracking	108	Albi	Albi108	11	9	10	2016	Polesi_haj	familiar	no	n.a.	n.a.	17:23:21	00:03:45	515	no	304	140	43	25	169	60	2.8	9	301	138	271	289	28	9.9	45	10	10
tracking	111	Albi	Albi111	11	26	10	2016	Kokotske_rybniky	familiar	yes	unknown	yes	14:54:16	00:16:32	2492	yes	1242	484	248	88	1002	420	2.3	4	64	15	160	70	100	8.2	45	6	11
tracking	118	Albi	Albi118	11	21	1	2017	Kokotske_rybniky	familiar	no	n.a.	n.a.	11:12:05	00:04:25	808	no	401	125	75	25	332	115	5	7	46	300	151	56	5	10.6	45	3	-2
tracking	129	Albi	Albi129	11	5	2	2017	Kokotske_rybniky	familiar	no	n.a.	n.a.	11:58:40	00:06:30	747	no	372	185	72	40	301	165	5	6	122	52	206	175	30	6.6	270	13	7
tracking_SR	1	Hugo	Hugo1	2	27	10	2014	Kokotske_rybniky	familiar	no	n.a.	n.a.	14:13:33	n.m.	n.m.	yes	n.m.	n.m.	n.m.	n.m.	n.m.	n.m.	3.7	7	325	98	274	65	24	8.2	180	9	9
tracking	3	Hugo	Hugo3	2	9	11	2014	Polesi_haj 2	familiar	no	n.a.	n.a.	14:44:16	00:04:05	326	no	154	135	31	40	142	70	0.7	5	210	105	262	32	5	6.1	45	2	8
tracking	5	Hugo	Hugo5	2	9	11	2014	Polesi_haj 2	familiar	no	n.a.	n.a.	16:06:46	00:09:05	658	no	195	145	66	90	398	310	0.3	5	21	22	207	267	4	4.7	315	3	8
tracking	10	Hugo	Hugo10	3	19	4	2015	Prostredni_vrch	unknown	no	n.a.	n.a.	11:53:22	00:06:35	763	no	383	195	73	60	307	140	1.8	6	221	175	6	339	3	7	calm	0	16
tracking	11	Hugo	Hugo11	3	21	6	2015	Milcice	unknown	no	n.a.	n.a.	10:08:31	00:03:10	408	no	206	90	38	20	165	80	6	9	122	284	84	71	31	7.3	270	12	12
tracking	18	Hugo	Hugo18	3	13	9	2015	Kokotske_rybniky	familiar	yes	roe deer	yes	11:57:30	00:09:35	809	no	401	265	86	40	322	270	2.6	8	52	290	102	145	2	4.6	calm	0	21
tracking	19	Hugo	Hugo19	3	7	2	2016	Kokotske_rybniky	familiar	no	n.a.	n.a.	11:42:15	00:05:05	406	no	239	190	41	55	125	60	1.3	2.1	45	65	268	34	10	6.1	calm	0	2
tracking	23	Hugo	Hugo23	4	27	3	2016	Polesi_haj 1	familiar	yes	roe deer	yes	11:07:50	00:08:30	978	no	583	325	103	55	290	130	5	7	25	265	104	14	7	7.7	225	2	7
tracking	25	Hugo	Hugo25	4	3	4	2016	Polesi_haj 1	familiar	no	n.a.	n.a.	10:14:35	00:09:20	1552	no	762	280	160	70	629	210	2.8	9	71	348	188	198	8	10.4	315	5	11
tracking	27	Hugo	Hugo27	4	3	4	2016	Polesi_haj 1	familiar	yes	roe deer	yes	10:48:10	00:05:40	678	no	267	125	68	45	343	170	2	6	212	65	257	255	3	7.2	270	5	12
tracking	29	Hugo	Hugo29	4	18	4	2016	Kokotske_rybniky	familiar	yes	roe deer	yes	18:01:15	00:10:45	1464	no	821	340	164	90	661	215	1.7	5	338	3	277	287	78	10.9	45	3	12
tracking	32	Hugo	Hugo32	4	18	4	2016	Kokotske_rybniky	familiar	no	n.a.	n.a.	18:55:30	00:03:35	283	no	139	100	31	35	115	80	1.7	2	227	136	310	271	6	4.8	180	5	11
tracking	34	Hugo	Hugo34	4	23	4	2016	Polesi_haj 1	familiar	no	n.a.	n.a.	14:15:05	00:02:25	404	no	192	65	51	30	160	50	0.3	6	39	346	175	55	8	10.2	315	9	14
tracking	37	Hugo	Hugo37	4	19	6	2016	Kokotske_rybniky	familiar	no	n.a.	n.a.	10:46:10	00:07:20	822	yes	262	135	62	45	314	125	2	3.1	308	71	198	75	3	5.9	0	4	23
tracking_SR	37	Hugo	Hugo37	4	19	6	2016	Kokotske_rybniky	familiar	no	n.a.	n.a.	10:46:10	n.m.	n.m.	no	n.m.	n.m.	n.m.	n.m.	n.m.	n.m.	0.8	1.5	109	71	210	152	50	10.5	0	4	23
tracking	41	Hugo	Hugo41	4	21	6	2016	Bolevecke_rybniky	unknown	no	n.a.	n.a.	20:06:47	00:02:45	305	no	124	65	30	20	151	80	3.7	42	36	290	182	232	5	6.8	225	6	22
tracking	42	Hugo	Hugo42	4	2	7	2016	Nove_domky	unknown	yes	roe deer	yes	15:44:20	00:08:35	1110	no	556	285	108	65	445	165	4	6	235	249	177	290	17	9.6	45	3	18
tracking	43	Hugo	Hugo43	4	3	7	2016	Nove_domky	unknown	no	n.a.	n.a.	14:51:25	00:07:27	538	no	318	291	57	44	163	112	1.8	2	321	230	165	88	6	5.1	90	10	18
tracking	44	Hugo	Hugo44	4	4	7	2016	Triskolupy	unknown	yes	roe deer	yes	07:59:02	00:05:56	429	no	259	198	43	72	127	86	0.1	0.7	255	218	309	188	3	4.6	45	4	13
tracking	45	Hugo	Hugo45	4	4	7	2016	Triskolupy	unknown	yes	hare	yes	08:06:00	00:02:36	287	no	146	78	31	24	110	54	0.9	2.9	257	177	32	152	2	7	45	4	13
tracking	46	Hugo	Hugo46	4	5	7	2016	Nove_domky	familiar	no	n.a.	n.a.	09:13:04	00:02:12	259	no	106	52	26	22	127	58	1.4	2.9	9	148	131	234	5	8.4	225	6	20
tracking	50	Hugo	Hugo50	4	19	7	2016	Stupno	familiar	yes	roe deer	yes	11:21:20	00:10:50	994	no	385	285	102	55	507	310	2.2	8	233	230	89	93	10	5.7	0	7	28
tracking	52	Hugo	Hugo52	4	19	7	2016	Stupno	familiar	no	n.a.	n.a.	12:06:20	00:06:15	353	no	212	265	34	45	108	65	1.2	6	8	230	359	4	5	5	0	7	27
tracking	54	Hugo	Hugo54	4	22	7	2016	Kokotske_rybniky	familiar	yes	roe deer	yes	18:41:15	00:08:30	902	no	359	225	91	55	452	230	1.2	4.2	31	177	255	343	8	6.9	90	12	26
tracking	55	Hugo	Hugo55	4	22	7	2016	Kokotske_rybniky	familiar	no	n.a.	n.a.	19:03:30	00:05:30	459	no	197	155	40	40	156	115	0.8	1.5	89	59	242	167	2	4.7	0	8	26
tracking	59	Hugo	Hugo59	4	10	8	2016	Kokotske_rybniky	familiar	yes	unknown	yes	13:57:35	00:07:45	664	no	330	220	70	50	265	195	3.2	8	200	48	283	200	15	4.9	270	5	18
tracking	65	Hugo	Hugo65	4	9	10	2016	Polesi_haj 1	familiar	no	n.a.	n.a.	16:55:10	00:04:35	612	no	303	115	59	40	251	120	2.1	3.6	309	37	226	212	58	7.4	45	10	10
tracking	66	Hugo	Hugo66	4	9	10	2016	Polesi_haj 1	familiar	no	n.a.	n.a.	17:23:10	00:04:00	535	no	265	110	56	40	215	90	0.1	6	43	184	279	106	8	8	45	10	10
tracking	68	Hugo	Hugo68	4	26	10	2016	Kokotske_rybniky	familiar	yes	unknown	yes	14:54:15	00:12:00	1893	no	947	374	186	85	760	260	2.5	5	77	32	174	284	95	10.1	45	6	11
tracking	70	Hugo	Hugo70	4	26	10	2016	Kokotske_rybniky	familiar	no	n.a.	n.a.	15:31:25	00:08:50	993	no	400	260	98	65	494	205	1.2	1.7	327	177	351	113	8	5.7	45	5	11
tracking	71	Hugo	Hugo71	4	26	10	2016	Kokotske_rybniky	familiar	no	n.a.	n.a.	16:01:15	00:09:15	803	no	318	190	81	85	404	280	0.5	2.5	137	320	116	320	3	4.9	45	6	11
tracking	76	Hugo	Hugo76	4	29	1	2017	Kokotske_rybniky	familiar	no	n.a.	n.a.	11:43:44	00:03:40	261	no	134	110	24	55	103	55	0.2	0.4	3	341	207	288	5	5.9	135	5	-8
tracking	77	Hugo	Hugo77	4	5	2	2017	Kokotske_rybniky	familiar	no	n.a.	n.a.	11:22:49	00:04:00	439	no	217	125	47	25	175	90	3.2	5	57	29	204	202	9	7.1	270	18	3
tracking	78	Hugo	Hugo78	4	5	2	2017	Kokotske_rybniky	familiar	yes	unknown	yes	11:34:19	00:15:40	1909	no	1142	520	187	100	581	320	1	5	129	80	46	68	26	6.7	270	18	3
tracking	4	Upirek	Upirek4	1	9	10	2016	Polesi_haj 1	unknown	no	n.a.	n.a.	16:59:07	00:09:15	887	no	262	105	90	55	535	395	0.7	2.2	7	55	224	200	41	4.9	45	10	10
tracking	5	Upirek	Upirek5	1	9	10	2016	Polesi_haj 1	unknown	no	n.a.	n.a.	17:23:37	00:06:15	681	no	275	120	64	60	341	195	0.5	1.5	39	110	276	5	5	5.8	45	10	10
tracking	6	Upirek	Upirek6	1	26	10	2016	Kokotske_rybniky	unknown	no	n.a.	n.a.	14:43:52	00:04:00	302	no	117	105	32	40	152	95	0.2	1.9	146	72	256	323	18	5.5	45	6	11
tracking_SR	7	Upirek	Upirek7	1	26	10	2016	Kokotske_rybniky	unknown	no	n.a.	n.a.	16:01:52	n.m.	n.m.	no	n.m.	n.m.	n.m.	n.m.	n.m.	n.m.	3.9	5	92	293	148	95	21	6.3	45	6	11
tracking	8	Upirek	Upirek8	1	28	12	2016	Hurky	unknown	yes	unknown	no	11:03:32	00:08:50	1143	no	455	205	114	35	573	290	11	11	326	137	239	274	6	7.1	270	16	5
tracking	10	Upirek	Upirek10	1	15	1	2017	Prostredni_vrch	unknown	yes	roe deer	no	12:56:20	00:34:58	2743	yes	1925	1305	276	285	542	508	0.6	1.8	184	313	230	348	12	3.7	270	24	1
tracking	11	Upirek	Upirek11	1	15	1	2017	Prostredni_vrch	unknown	yes	roe deer	no	13:33:55	00:12:40	898	no	536	390	88	103	275	267	1	2.8	280	305	102	21	2	3.7	270	22	1
tracking	12	Upirek	Upirek12	1	15	1	2017	Prostredni_vrch	unknown	yes	hare	no	13:52:05	00:07:48	660	no	334	170	66	75	259	223	0.7	2.4	200	20	167	256	5	3.9	270	21	1
tracking	13	Upirek	Upirek13	1	15	1	2017	Ptice_vysilac	familiar	yes	hare	no	14:00:25	00:06:03	387	no	157	140	38	73	191	150	0.5	1.5	181	325	161	291	11	3.8	270	21	1
tracking	14	Upirek	Upirek14	1	21	1	2017	Kokotske_rybniky	familiar	yes	unknown	yes	11:12:01	00:18:10	1625	no	808	620	166	165	651	305	0.9	3.7	102	177	257	276	26	5.5	45	3	-2
tracking	15	Upirek	Upirek15	1	21	1	2017	Kokotske_rybniky	familiar	no	n.a.	n.a.	11:31:46	00:04:40	286	no	138	155	31	40	117	85	1.4	1.7	299	34	217	50	2	4.5	45	1	-2
tracking	16	Upirek	Upirek16	1	29	1	2017	Kokotske_rybniky	familiar	yes	unknown	no	10:55:06	00:06:40	672	no	268	155	73	55	332	190	2.1	3.1	335	93	221	279	2	6.2	calm	0	-7
tracking	18	Upirek	Upirek18	1	29	1	2017	Kokotske_rybniky	familiar	yes	unknown	no	11:16:21	00:19:10	1741	no	696	400	173	195	872	555	0.5	3.2	334	65	321	31	7	5.6	calm	0	-7
tracking	19	Upirek	Upirek19	1	5	2	2017	Kokotske_rybniky	familiar	no	n.a.	n.a.	11:01:14	00:02:38	262	no	130	90	26	28	105	40	0.8	1.7	244	71	281	345	2	7.9	225	14	6
tracking	20	Upirek	Upirek20	1	5	2	2017	Kokotske_rybniky	familiar	no	n.a.	n.a.	11:10:11	00:05:25	471	no	146	105	45	70	279	150	0.5	1.7	178	73	225	279	3	4.3	225	14	6
tracking	22	Upirek	Upirek22	1	5	2	2017	Kokotske_rybniky	familiar	no	n.a.	n.a.	11:27:31	00:04:25	435	no	179	125	44	35	213	105	2.4	5	257	29	270	260	9	6.5	225	14	6
tracking	24	Upirek	Upirek24	1	17	2	2017	Stupno	unknown	yes	roe deer	no	15:10:58	00:03:42	614	no	247	80	63	25	303	117	1	7	277	201	69	81	74	9.2	270	18	6
tracking	25	Upirek	Upirek25	1	17	2	2017	Stupno	unknown	yes	unknown	yes	15:16:33	00:23:37	2534	no	1272	622	251	200	1009	595	2.6	7	106	87	331	254	46	5.7	270	18	6
tracking	1	Demi	Demi1	4	27	9	2016	Omice	familiar	yes	unknown	no	15:43:42	00:25:35	2076	no	616	355	209	100	1250	1080	1	1.1	132	267	128	128	50	4.2	90	5	21
tracking_SR	3	Demi	Demi3	4	29	9	2016	Ridelov	familiar	yes	roe deer	no	10:16:10	n.m.	n.m.	no	n.m.	n.m.	n.m.	n.m.	n.m.	n.m.	6	8	200	161	150	138	58	7.1	270	2	16
tracking	4	Demi	Demi4	4	29	9	2016	Ridelov	familiar	no	n.a.	n.a.	10:37:25	00:04:18	355	no	143	112	36	48	177	98	0.3	2.1	311	261	86	359	15	6.2	225	4	17
tracking	5	Demi	Demi5	4	29	9	2016	Ridelov	familiar	no	n.a.	n.a.	10:46:08	00:02:56	323	no	163	108	31	20	129	48	1.6	5	230	288	88	54	47	9	225	4	17
tracking	6	Demi	Demi6	4	30	9	2016	Ridelov	familiar	yes	roe deer	no	17:05:40	00:15:36	1990	no	1188	574	204	136	596	226	1.4	2.3	100	255	158	199	146	7	270	5	23
tracking	7	Demi	Demi7	4	1	10	2016	Ridelov	familiar	yes	roe deer	no	15:10:33	00:10:43	1128	no	564	312	114	98	450	233	1.3	4.2	277	36	178	305	4	6.2	135	6	22
tracking	8	Demi	Demi8	4	1	10	2016	Ridelov	familiar	yes	unknown	no	15:25:19	00:41:56	4454	no	2227	1189	444	412	1783	915	0.3	2.3	123	169	345	78	4	6.9	135	6	22
tracking	9	Demi	Demi9	4	9	10	2016	Kurim	familiar	no	n.a.	n.a.	10:40:08	00:04:45	540	no	323	166	55	36	162	83	1.4	3.9	344	299	136	244	7	7	315	4	8
tracking	10	Demi	Demi10	4	18	10	2016	Omice	familiar	yes	unknown	no	11:14:27	00:11:25	1389	no	686	400	144	65	559	220	1.4	3.1	150	192	343	357	3	7.7	225	4	8
tracking	11	Demi	Demi11	4	21	10	2016	Samotin	familiar	yes	unknown	no	12:18:45	00:10:09	1401	yes	700	328	141	107	560	174	1.3	2.8	206	94	250	251	15	7.8	calm	0	7
tracking	12	Demi	Demi12	4	28	10	2016	Omice	familiar	no	n.a.	n.a.	13:59:04	00:06:12	661	no	463	246	65	58	134	68	1.5	2.7	82	161	299	151	4	8.7	225	10	11
tracking	13	Demi	Demi13	4	28	10	2016	Omice	familiar	no	n.a.	n.a.	14:06:03	00:04:26	352	no	174	161	35	40	141	65	1.2	2.4	309	323	144	227	3	7.3	225	10	11
tracking	14	Demi	Demi14	4	28	10	2016	Omice	familiar	no	n.a.	n.a.	14:19:59	00:08:41	868	no	350	174	87	99	429	248	0.5	4	210	231	118	181	5	6	225	10	11
tracking	20	Demi	Demi20	4	9	11	2016	Strelice	familiar	yes	unknown	no	10:46:27	00:07:50	1384	no	941	340	149	60	294	70	1.2	1.5	228	228	352	42	6	13.3	225	6	1
tracking	30	Demi	Demi30	4	7	12	2016	Strelice	familiar	yes	roe deer	no	10:42:47	00:05:20	847	no	350	120	82	40	416	160	7	7	338	200	38	95	15	7.4	270	1	-2
tracking	33	Demi	Demi33	4	25	12	2016	Omice	familiar	yes	unknown	no	12:04:12	00:19:20	1880	yes	747	445	188	210	944	505	1.5	3.6	212	240	101	32	13	6.7	270	27	4
tracking	34	Demi	Demi34	4	25	12	2016	Omice	familiar	no	n.a.	n.a.	11:22:57	00:03:00	450	no	223	80	49	25	178	75	2.8	3.7	341	281	105	346	2	8.4	270	27	4
tracking	41	Demi	Demi41	4	25	2	2017	Omice	familiar	no	n.a.	n.a.	13:17:26	00:06:25	701	no	420	250	68	55	213	80	1.2	6	358	115	194	130	16	9.6	270	19	4
tracking	42	Demi	Demi42	4	27	2	2017	Omice	familiar	yes	roe deer	yes	11:25:03	00:19:21	3602	no	1441	588	358	144	1805	429	2.8	7	267	339	172	359	5	9.2	180	17	5
tracking_SR	42	Demi	Demi42	4	27	2	2017	Omice	familiar	yes	roe deer	yes	11:25:03	n.m.	n.m.	yes	n.m.	n.m.	n.m.	n.m.	n.m.	n.m.	3.4	17	342	339	145	341	2	14.5	180	17	5
tracking	1	Cecil	Cecil1	4	26	6	2016	Chynava	familiar	yes	roe deer	yes	10:36:36	00:05:56	918	no	452	187	94	45	371	124	6	11	95	133	277	294	57	10	315	12	18
tracking	2	Cecil	Cecil2	4	26	6	2016	Chynava	familiar	yes	hare	yes	10:44:07	00:03:45	452	no	181	70	44	30	227	125	1.2	5	261	256	54	112	52	6.5	315	12	18
tracking	5	Cecil	Cecil5	4	2	7	2016	Nove_domky	unknown	no	n.a.	n.a.	15:02:32	00:04:57	590	no	295	149	58	48	236	100	1.2	6	243	34	159	117	5	8.1	135	4	19
tracking	6	Cecil	Cecil6	4	2	7	2016	Nove_domky	unknown	yes	roe deer	yes	15:42:34	00:10:40	1116	no	559	334	113	68	444	238	2.5	5	139	290	158	175	4	6.6	45	4	19
tracking	7	Cecil	Cecil7	4	4	7	2016	Triskolupy	unknown	no	n.a.	n.a.	08:28:15	00:07:22	491	no	295	302	48	38	149	102	1.7	3.9	149	24	209	173	14	5.3	45	6	16
tracking	8	Cecil	Cecil8	4	5	7	2016	Nove_domky	unknown	no	n.a.	n.a.	09:12:07	00:05:45	629	no	392	240	60	35	178	70	0.5	3.3	49	323	111	19	3	8.7	135	4	21
tracking	9	Cecil	Cecil9	4	5	7	2016	Nove_domky	unknown	no	n.a.	n.a.	09:18:07	00:06:40	583	no	172	80	59	90	352	230	1.1	3.2	16	27	186	22	5	5.2	225	6	20
tracking	10	Cecil	Cecil10	4	5	7	2016	Nove_domky	unknown	no	n.a.	n.a.	09:25:17	00:05:05	594	no	289	135	62	55	242	115	1.1	4.1	297	235	136	156	17	6.5	225	6	20
tracking	11	Cecil	Cecil11	4	7	7	2016	Diana	unknown	yes	roe deer	yes	09:52:37	00:37:35	3711	no	1815	1000	379	195	1517	1060	1.8	5	259	97	83	255	18	5.3	315	10	19
tracking	13	Cecil	Cecil13	4	16	7	2016	Sv_jan	familiar	yes	unknown	yes	14:22:18	00:14:27	1243	no	593	282	116	89	483	307	1.5	1.8	58	237	282	194	7	5.6	45	19	20
tracking	14	Cecil	Cecil14	4	16	7	2016	Sv_jan	familiar	yes	hare	yes	14:38:01	00:09:44	496	no	248	206	49	105	199	273	0.1	0.6	5	49	250	352	2	2.42	45	19	20
tracking	15	Cecil	Cecil15	4	29	7	2016	Chomutov	unknown	yes	unknown	yes	11:19:37	00:04:10	413	no	192	105	41	30	181	115	1.7	2.9	123	345	204	344	4	5.7	90	4	21
tracking	16	Cecil	Cecil16	4	29	7	2016	Chomutov	unknown	yes	unknown	yes	11:35:37	00:04:50	633	no	320	145	64	45	250	100	1.6	5	20	185	350	311	9	8.3	90	4	21
tracking	21	Cecil	Cecil21	4	31	7	2016	Krusovice	unknown	no	n.a.	n.a.	12:53:27	00:10:35	1062	no	636	405	105	70	321	160	2	6	228	317	107	70	14	7	180	7	21
tracking	23	Cecil	Cecil23	4	6	8	2016	Krusovice	unknown	no	n.a.	n.a.	12:00:27	00:03:40	261	no	133	115	24	40	106	65	0.9	1.2	206	225	45	218	3	5.7	0	5	20
tracking	24	Cecil	Cecil24	4	6	8	2016	Krusovice	unknown	no	n.a.	n.a.	12:05:57	00:07:55	547	no	222	185	55	50	270	240	2.2	2.3	254	267	131	323	2	4.1	0	5	20
tracking	27	Cecil	Cecil27	4	7	8	2016	Sv_jan	familiar	no	n.a.	n.a.	10:30:47	00:13:55	1305	no	791	465	123	90	391	280	1.3	2.4	138	205	120	265	6	5	315	11	20
tracking	29	Cecil	Cecil29	4	14	8	2016	Belec	unknown	no	n.a.	n.a.	12:01:21	00:02:46	263	no	104	52	27	27	133	87	0.6	3.1	13	21	224	181	3	5.3	90	5	24
tracking	30	Cecil	Cecil30	4	14	8	2016	Belec	unknown	no	n.a.	n.a.	13:19:06	00:04:58	486	no	242	154	47	42	199	102	1.3	3.3	337	9	156	117	21	6.8	180	14	25
tracking	34	Cecil	Cecil34	4	18	8	2016	Sv_jan	familiar	no	n.a.	n.a.	16:06:02	00:03:39	352	no	138	82	36	19	177	118	3.5	6	294	248	65	105	9	5.4	90	8	23
tracking	35	Cecil	Cecil35	4	2	9	2016	Krusovice	familiar	no	n.a.	n.a.	16:48:47	00:09:15	453	no	226	275	46	75	181	205	1	1.5	171	298	128	197	17	2.7	225	2	24
tracking_SR	35	Cecil	Cecil35	4	2	9	2016	Krusovice	familiar	no	n.a.	n.a.	16:48:47	n.m.	n.m.	no	n.m.	n.m.	n.m.	n.m.	n.m.	n.m.	1.1	2.1	28	298	154	160	5	2.8	225	2	24
tracking	36	Cecil	Cecil36	4	4	9	2016	Belec	unknown	no	n.a.	n.a.	13:08:52	00:05:35	516	no	205	120	45	45	267	170	3.4	8	78	145	319	158	2	5.6	45	18	25
tracking	37	Cecil	Cecil37	4	6	9	2016	Krusovice	familiar	no	n.a.	n.a.	14:57:37	00:04:35	383	no	115	110	34	20	233	145	2.4	5	327	330	134	157	19	5.8	45	14	19
tracking	38	Cecil	Cecil38	4	6	9	2016	Krusovice	familiar	no	n.a.	n.a.	15:55:27	00:03:55	284	no	114	115	28	25	141	95	1.6	7	104	150	14	47	9	5.2	0	10	19
tracking	41	Cecil	Cecil41	4	8	10	2016	Sv_jan	familiar	yes	unknown	yes	10:31:37	00:14:45	1726	no	863	410	174	120	690	355	0.6	2.1	148	245	1	47	7	6.7	270	11	7
tracking	42	Cecil	Cecil42	4	6	11	2016	Sv_jan	familiar	no	n.a.	n.a.	11:11:37	00:08:10	896	no	445	215	91	50	361	225	1.1	7	116	242	160	234	76	6.1	180	6	6
tracking	43	Cecil	Cecil43	4	13	11	2016	Belec	familiar	no	n.a.	n.a.	12:41:52	00:03:40	415	no	199	110	44	25	172	85	2.2	4.4	206	267	53	138	7	7.3	0	6	0
tracking	44	Cecil	Cecil44	4	13	11	2016	Belec	familiar	yes	roe deer	yes	12:50:52	00:08:35	950	yes	381	180	93	65	478	270	1.4	3.7	46	30	217	95	3	6.2	0	6	0
tracking	45	Cecil	Cecil45	4	4	12	2016	Krusovice	familiar	yes	roe deer	yes	13:16:37	00:21:15	2365	no	1178	575	239	145	947	555	1.3	4.2	356	290	157	225	62	6.1	90	4	0
tracking	46	Cecil	Cecil46	4	17	12	2016	Krusovice	familiar	no	n.a.	n.a.	13:24:27	00:05:45	516	no	257	185	49	35	211	125	2.2	8	342	164	104	126	3	6	225	7	-1
tracking_SR	47	Cecil	Cecil47	4	17	12	2016	Krusovice	familiar	no	n.a.	n.a.	13:39:57	n.m.	n.m.	no	n.m.	n.m.	n.m.	n.m.	n.m.	n.m.	4.1	5	76	87	31	59	2	6.5	225	7	-1
tracking	49	Cecil	Cecil49	4	27	12	2016	Krusovice	familiar	yes	fallow deer	yes	10:43:47	00:09:30	1216	no	614	255	116	75	488	240	0.2	0.7	308	357	129	95	3	7	315	17	4
tracking	50	Cecil	Cecil50	4	27	12	2016	Krusovice	familiar	yes	hare	yes	12:36:32	00:05:20	578	no	289	160	53	35	235	125	0.7	7	324	342	188	139	2	6.7	270	23	4
tracking	51	Cecil	Cecil51	4	25	2	2017	Sv_jan	familiar	yes	unknown	no	14:22:16	00:05:55	644	no	322	165	65	40	256	150	1.7	1.9	240	237	110	20	5	6.2	135	8	6
tracking	53	Cecil	Cecil53	4	1	3	2017	Stupno	unknown	yes	roe deer	no	14:46:01	00:07:10	1359	no	951	300	128	45	279	85	1.5	4	138	84	318	291	2	9	180	18	7
tracking	54	Cecil	Cecil54	4	1	3	2017	Stupno	unknown	no	n.a.	n.a.	15:24:11	00:03:55	578	no	287	90	61	40	230	105	1.6	4.2	22	237	120	87	13	7.4	225	18	7
tracking	55	Cecil	Cecil55	4	1	3	2017	Stupno	unknown	yes	roe deer	no	15:53:41	00:04:55	617	no	378	150	55	30	184	115	2.6	2.7	348	267	72	349	4	5.8	225	19	7
tracking	56	Cecil	Cecil56	4	1	3	2017	Stupno	unknown	yes	roe deer	no	16:53:56	00:04:25	577	no	286	135	52	30	238	100	2	5	160	150	340	314	9	8.4	135	19	7
tracking	57	Cecil	Cecil57	4	1	3	2017	Stupno	unknown	yes	roe deer	no	17:17:11	00:04:00	406	no	206	125	40	35	160	80	2.7	3.3	92	228	12	72	17	6.8	180	10	7
tracking	58	Cecil	Cecil58	4	4	3	2017	Brezina	unknown	yes	roe deer	yes	09:43:02	00:15:24	2090	no	1042	400	212	130	836	394	0.6	10	210	153	51	137	9	7.6	calm	0	4
tracking	1	Hennessy	Hennessy1	2	18	6	2015	Trzek	familiar	yes	roe deer	no	05:53:46	00:06:50	697	no	418	265	74	90	205	55	0.6	1.5	165	295	83	83	7	7.6	180	5	11
tracking	4	Hennessy	Hennessy4	2	21	6	2015	Trzek	familiar	no	n.a.	n.a.	05:49:06	00:08:00	1062	no	607	190	114	45	341	245	6	18	153	117	321	22	16	5.5	270	21	11
tracking	5	Hennessy	Hennessy5	2	21	6	2015	Trzek	familiar	yes	hare	no	06:01:16	00:07:00	884	no	537	230	73	65	275	125	0	3.4	159	357	305	223	9	6.6	270	21	11
tracking	10	Hennessy	Hennessy10	2	3	7	2015	Litomysl	familiar	no	n.a.	n.a.	05:27:55	00:03:50	905	no	379	70	99	15	427	145	9	10	66	113	266	279	27	10.6	135	8	15
tracking	34	Hennessy	Hennessy34	2	28	10	2015	Litomysl	familiar	no	n.a.	n.a.	06:37:22	00:05:29	1093	no	549	188	110	52	433	89	2	7	72	158	252	249	23	14.4	90	19	9
tracking	39	Hennessy	Hennessy39	2	20	11	2015	Litomysl	familiar	yes	unknown	no	06:47:40	00:08:14	1218	no	615	206	120	79	482	209	2.6	6	341	238	23	38	5	8.4	225	31	9
tracking	55	Hennessy	Hennessy55	2	2	1	2016	Litomysl	familiar	no	n.a.	n.a.	07:50:37	00:06:23	708	no	281	146	74	142	353	95	2.1	5	214	129	288	15	8	10.9	135	10	0
tracking	89	Hennessy	Hennessy89	3	19	4	2016	Trzek	familiar	yes	roe deer	no	06:44:05	00:12:00	2313	no	983	125	211	135	1118	460	0.2	20	330	332	211	245	2	8.9	calm	0	4
tracking	93	Hennessy	Hennessy93	3	21	6	2016	Litomysl	familiar	no	n.a.	n.a.	06:44:54	00:02:58	881	no	438	46	86	35	358	97	2.4	8	88	327	198	267	135	12.3	calm	0	15
tracking	94	Hennessy	Hennessy94	3	27	6	2016	Litomysl	familiar	no	n.a.	n.a.	06:18:53	00:04:07	467	no	324	182	50	31	92	34	3.5	7	238	91	337	1	54	10.2	225	5	16
tracking	96	Hennessy	Hennessy96	3	14	9	2016	Trzek	familiar	no	n.a.	n.a.	07:37:51	00:01:26	570	no	301	36	49	12	220	38	4.1	9	320	165	103	91	2	20.2	calm	0	16
tracking	103	Hennessy	Hennessy103	3	15	11	2016	Trzek	familiar	yes	roe deer	no	10:22:06	00:03:37	1239	no	749	84	120	53	370	80	0.8	11	261	262	128	148	176	16.7	135	10	1
tracking	104	Hennessy	Hennessy104	3	26	11	2016	Trzek	familiar	yes	hare	no	10:09:28	00:01:53	439	no	269	32	40	49	130	32	1.5	8	334	345	119	76	10	8.3	90	5	7
tracking	105	Hennessy	Hennessy105	3	4	12	2016	Trzek	familiar	yes	roe deer	no	10:03:57	00:02:05	859	no	583	56	88	14	188	55	21	23	205	264	132	151	15	13.9	calm	0	-1
tracking	107	Hennessy	Hennessy107	3	4	2	2017	Trzek	familiar	yes	roe deer	no	13:32:47	00:03:51	1379	no	697	68	141	36	543	127	1.4	10	218	276	31	347	48	15.4	calm	0	5
tracking	3	Bay	Bay3	3	2	7	2016	Modrejovice	familiar	no	n.a.	n.a.	14:10:27	00:04:55	573	no	222	80	58	45	293	170	1	4.2	286	145	348	91	5	6.2	45	6	21
tracking	4	Bay	Bay4	3	2	7	2016	Modrejovice	familiar	yes	roe deer	yes	14:22:02	00:14:35	1568	no	785	295	164	205	619	375	0	0.9	305	159	287	236	19	5.7	45	6	21
tracking	5	Bay	Bay5	3	8	7	2016	Modrejovice	familiar	yes	unknown	yes	14:04:37	00:23:05	1663	no	1331	1140	167	185	166	60	0.9	3	18	160	336	21	8	4.5	315	16	27
tracking	8	Bay	Bay8	3	31	7	2016	Modrejovice	familiar	yes	red deer	yes	13:24:17	00:09:45	1414	no	564	170	135	95	714	320	0.8	12	284	205	164	252	20	8	225	8	21
tracking	9	Bay	Bay9	3	31	7	2016	Modrejovice	familiar	no	n.a.	n.a.	13:41:12	00:04:30	431	no	174	90	37	30	221	150	2.8	3.8	317	195	360	326	12	5.2	225	8	21
tracking	10	Bay	Bay10	3	31	7	2016	Modrejovice	familiar	yes	roe deer	yes	13:46:07	00:12:30	867	no	432	315	87	125	348	310	0.4	2.1	97	104	296	179	7	3.9	225	8	21
tracking	11	Bay	Bay11	3	7	8	2016	Modrejovice	familiar	yes	unknown	yes	15:56:57	00:10:55	1008	no	617	405	95	80	296	170	0.6	1.1	119	227	20	104	10	5.8	270	11	26
tracking	13	Bay	Bay13	3	11	8	2016	Modrejovice	familiar	no	n.a.	n.a.	17:17:42	00:07:15	875	no	608	320	84	35	185	80	3.3	7	164	270	24	213	2	8	45	10	18
tracking	1	Gina	Gina1	1	16	7	2016	Modrejovice	unknown	yes	roe deer	yes	10:33:17	00:04:40	365	no	182	135	35	60	148	85	0.7	3.3	329	282	136	13	4	4.8	0	23	19
tracking	2	Gina	Gina2	1	16	7	2016	Modrejovice	unknown	yes	unknown	no	10:40:57	00:05:25	703	no	346	135	68	35	289	155	3.4	10	83	332	108	110	2	6.8	0	23	19
tracking	4	Gina	Gina4	1	16	7	2016	Modrejovice	unknown	no	n.a.	n.a.	10:57:12	00:04:35	485	no	247	145	50	35	188	95	1.1	4.4	195	97	7	331	5	7	45	16	19
tracking	7	Gina	Gina7	1	23	9	2016	Ronov	unknown	no	n.a.	n.a.	09:21:52	00:04:05	430	no	219	130	42	35	169	80	3	3.8	301	259	53	306	4	6.8	225	4	11
tracking	8	Gina	Gina8	1	23	9	2016	Ronov	unknown	no	n.a.	n.a.	09:35:42	00:04:00	593	no	345	145	60	30	187	65	1.9	5	230	149	52	85	7	9.9	225	4	11
tracking	1	Safira	Safira1	2	16	9	2016	Modrejovice	familiar	yes	roe deer	yes	09:32:37	00:15:15	1579	no	938	565	151	40	489	310	3.5	10	78	132	301	271	144	12.7	270	3	18
tracking	4	Safira	Safira4	2	11	10	2016	Modrejovice	familiar	yes	unknown	yes	10:14:29	00:19:56	2534	yes	1768	839	252	157	516	200	0	2.7	230	174	18	78	46	9	45	3	6
tracking	7	Safira	Safira7	3	11	2	2017	Modrejovice	familiar	yes	unknown	yes	14:04:45	00:06:00	469	no	254	155	48	70	166	135	0	0.6	87	23	211	283	43	4.3	90	1	0
tracking	8	Safira	Safira8	3	18	11	2017	Modrejovice	familiar	yes	unknown	yes	13:13:31	00:04:35	679	no	419	165	65	25	195	85	7	9	85	82	319	28	11	8.3	270	9	4
tracking	9	Safira	Safira9	3	27	12	2017	Modrejovice	familiar	yes	unknown	yes	13:50:55	00:25:10	2495	no	1398	695	272	275	825	540	0.7	6	209	196	14	143	6	5.1	90	6	-1
tracking	12	Safira	Safira12	3	28	12	2017	Modrejovice	familiar	yes	red deer	yes	14:33:05	00:08:00	867	no	348	170	83	50	436	260	1.7	6	150	40	193	38	2	6	315	11	2
tracking	13	Safira	Safira13	3	29	12	2017	Modrejovice	familiar	yes	roe deer	yes	10:12:05	00:04:50	670	no	350	160	67	30	253	100	1.9	11	170	100	164	328	17	9.1	270	3	-1
tracking	1	Kuky	Kuky1	5	10	4	2016	Stupno	unknown	no	n.a.	n.a.	09:52:00	00:04:30	397	no	163	127	37	23	197	120	3.6	4.4	355	125	343	356	7	5.9	315	12	6
tracking_SR	2	Kuky	Kuky2	5	10	4	2016	Stupno	unknown	yes	roe deer	no	12:17:42	n.m.	n.m.	yes	n.m.	n.m.	n.m.	n.m.	n.m.	n.m.	2.8	5	282	325	190	264	40	5.3	315	12	6
tracking	3	Kuky	Kuky3	6	11	2	2017	Prostredni_vrch	unknown	no	n.a.	n.a.	14:28:05	00:04:50	453	no	231	130	46	35	176	125	2.6	5	310	15	191	242	9	5.2	135	6	0

## Sheet: segments´ calculation
Dog	Track ID	Segment	GPS points	Average speed of segment (km/h)	Type of trajectory	Alternative turning point
Bessy	2	1	1-10	8.6	outbound	no
Bessy	2	2	11-17	10.6	outbound	no
Bessy	2	3	18-21	16.3	outbound	no
Bessy	2	4	22-27	12.1	outbound	no
Bessy	2	5	28-38	10.4	outbound	no
Bessy	2	6	39-50	6.9	turning	no
Bessy	2	7	51-62	8.5	inbound	no
Bessy	2	8	63-71	12.6	inbound	no
Bessy	2	9	72-78	12.2	inbound	no
Bessy	2	10	79-84	14.5	inbound	no
Bessy	3	1	1-11	11.8	outbound	no
Bessy	3	2	12-27	7.9	outbound	no
Bessy	3	3	28-47	6.4	outbound	no
Bessy	3	4	48-58	12.2	outbound	no
Bessy	3	5	59-75	7.9	outbound	no
Bessy	3	6	76-106	4.2	turning	no
Bessy	3	7	107-130	5.5	inbound	no
Bessy	3	8	131-142	11.8	inbound	no
Bessy	3	9	143-152	12.6	inbound	no
Bessy	3	10	153-171	6.2	inbound	no
Bessy	4	1	1-13	4.6	outbound	no
Bessy	4	2	14-20	6.9	outbound	no
Bessy	4	3	21-28	6.8	outbound	no
Bessy	4	4	29-36	7.1	outbound	no
Bessy	4	5	37-56	2.7	outbound	no
Bessy	4	6	57-75	2.53	turning	no
Bessy	4	7	76-85	6.1	inbound	no
Bessy	4	8	86-93	7.4	inbound	no
Bessy	4	9	94-102	6.1	inbound	no
Bessy	4	10	103-109	9.2	inbound	no
Bessy	5	1	1-7	12.1	outbound	no
Bessy	5	2	8-15	11.1	outbound	no
Bessy	5	3	16-23	11.4	outbound	no
Bessy	5	4	24-29	14.1	outbound	no
Bessy	5	5	30-34	14.1	outbound	no
Bessy	5	6	35-45	7.9	turning	no
Bessy	5	7	46-57	6.9	inbound	no
Bessy	5	8	58-63	13.4	inbound	no
Bessy	5	9	64-71	10.9	inbound	no
Bessy	5	10	72-80	10.5	inbound	no
Bessy	6	1	1-17	9.4	outbound	no
Bessy	6	2	18-28	15.9	outbound	no
Bessy	6	3	29-40	13.7	outbound	no
Bessy	6	4	41-52	14.7	outbound	no
Bessy	6	5	53-68	7.9	outbound	no
Bessy	6	6	69-89	6.2	outbound	no
Bessy	6	7	90-111	5.6	turning	no
Bessy	6	8	112-128	8.5	inbound	no
Bessy	6	9	129-141	13.3	inbound	no
Bessy	6	10	142-155	11.6	inbound	no
Bessy	7	1	1-5	9.1	outbound	no
Bessy	7	2	6-13	6.6	outbound	no
Bessy	7	3	14-17	12.2	outbound	no
Bessy	7	4	18-21	13.3	outbound	no
Bessy	7	5	22-29	5.8	outbound	no
Bessy	7	6	30-34	8.6	outbound	no
Bessy	7	7	35-39	9.6	turning	no
Bessy	7	8	40-42	14	inbound	no
Bessy	7	9	43-45	14.6	inbound	no
Bessy	7	10	46-51	11.4	inbound	no
Bessy	8	1	1-6	18.1	outbound	no
Bessy	8	2	7-16	10.2	outbound	no
Bessy	8	3	17-26	9.5	outbound	no
Bessy	8	4	27-35	11.7	outbound	no
Bessy	8	5	36-52	6.3	turning	no
Bessy	8	6	53-63	9.4	inbound	no
Bessy	8	7	64-77	6.9	inbound	no
Bessy	8	8	78-90	8.1	inbound	no
Bessy	8	9	91-106	6.6	inbound	no
Bessy	8	10	107-118	9.5	inbound	no
Bessy	9	1	1-8	5.8	outbound	no
Bessy	9	2	9-12	13.3	outbound	no
Bessy	9	3	13-15	16.3	outbound	no
Bessy	9	4	16-23	5.7	outbound	no
Bessy	9	5	24-30	6.4	turning	no
Bessy	9	6	31-35	10.3	inbound	no
Bessy	9	7	36-38	15.9	inbound	no
Bessy	9	8	39-42	12.4	inbound	no
Bessy	9	9	43-48	8.1	inbound	no
Bessy	9	10	49-54	8.6	inbound	no
Bessy	10	1	1-18	10.8	outbound	no
Bessy	10	2	19-32	13.9	outbound	no
Bessy	10	3	33-47	13.2	outbound	no
Bessy	10	4	48-65	9.9	outbound	no
Bessy	10	5	66-83	10.5	outbound	no
Bessy	10	6	84-95	11.7	outbound	no
Bessy	10	7	96-108	8.5	turning	no
Bessy	10	8	109-126	10.7	inbound	no
Bessy	10	9	127-145	9.9	inbound	no
Bessy	10	10	146-164	10.9	inbound	no
Gofi	1	1	1-3	9.9	outbound	no
Gofi	1	2	4-5	13.3	outbound	no
Gofi	1	3	6	8.3	outbound	no
Gofi	1	4	7-8	11.8	outbound	no
Gofi	1	5	9-10	11.2	outbound	no
Gofi	1	6	11-14	9.1	turning	no
Gofi	1	7	15-17	10.4	inbound	no
Gofi	1	8	18-20	8.8	inbound	no
Gofi	1	9	21-22	11.3	inbound	no
Gofi	1	10	23-25	9.7	inbound	no
Gofi	18	1	1-3	12.7	outbound	no
Gofi	18	2	4-7	9.8	outbound	no
Gofi	18	3	8-10	15.3	outbound	no
Gofi	18	4	11-17	7.3	outbound	no
Gofi	18	5	18-22	10.6	outbound	no
Gofi	18	6	23-30	6.7	turning	no
Gofi	18	7	31-36	8	inbound	no
Gofi	18	8	37-40	13.1	inbound	no
Gofi	18	9	41-44	13	inbound	no
Gofi	18	10	45-50	10.8	inbound	no
Gofi	19	1	1-2	15.1	outbound	no
Gofi	19	2	3-5	9.5	outbound	no
Gofi	19	3	6-8	9.6	outbound	no
Gofi	19	4	9-12	8	outbound	no
Gofi	19	5	13-16	7.7	outbound	no
Gofi	19	6	17-23	4.6	turning	no
Gofi	19	7	24-27	8	inbound	no
Gofi	19	8	28-29	12.8	inbound	no
Gofi	19	9	30-32	9	inbound	no
Gofi	19	10	33-36	10.9	inbound	no
Gofi	20	1	1-3	7.3	outbound	no
Gofi	20	2	4-6	6.5	outbound	no
Gofi	20	3	7	10.9	outbound	no
Gofi	20	4	8	11.4	outbound	no
Gofi	20	5	9-15	2.7	turning	no
Gofi	20	6	16-18	6.3	inbound	no
Gofi	20	7	19-24	2.46	inbound	no
Gofi	20	8	25-27	6	inbound	no
Gofi	20	9	28	11.6	inbound	no
Gofi	20	10	29-31	10.8	inbound	no
Gofi	22	1	1-5	5.6	outbound	no
Gofi	22	2	6-8	10.4	outbound	no
Gofi	22	3	9-11	10.1	outbound	no
Gofi	22	4	12-23	2.28	outbound	no
Gofi	22	5	24-30	4.5	outbound	no
Gofi	22	6	31-36	5	turning	no
Gofi	22	7	37-39	9	inbound	no
Gofi	22	8	40-42	11.9	inbound	no
Gofi	22	9	43-45	11.6	inbound	no
Gofi	22	10	46-51	5.7	inbound	no
Gofi	25	1	1-4	7.8	outbound	no
Gofi	25	2	5-9	6.9	outbound	no
Gofi	25	3	10-11	15.8	outbound	no
Gofi	25	4	12-16	6.1	outbound	no
Gofi	25	5	17-20	7.3	outbound	no
Gofi	25	6	21-28	3.8	turning	no
Gofi	25	7	29-33	6.2	inbound	no
Gofi	25	8	34-37	7.2	inbound	no
Gofi	25	9	38-39	14.4	inbound	no
Gofi	25	10	40-45	6.7	inbound	no
Gofi	26	1	1-4	5	outbound	no
Gofi	26	2	5-8	5.6	outbound	no
Gofi	26	3	9-14	4.4	outbound	no
Gofi	26	4	15-16	18.6	outbound	no
Gofi	26	5	17-18	14.2	turning	yes
Gofi	26	6	19-20	17.1	inbound	no
Gofi	26	7	21-23	8.7	inbound	no
Gofi	26	8	24-25	9.7	inbound	no
Gofi	26	9	26-27	8.8	inbound	no
Gofi	26	10	28-30	8.1	inbound	no
Gofi	27	1	1-5	5.5	outbound	no
Gofi	27	2	6-13	3.7	outbound	no
Gofi	27	3	14-20	3.7	turning	no
Gofi	27	4	21-25	5.9	inbound	no
Gofi	27	5	26-30	5.1	inbound	no
Gofi	27	6	31-36	4.7	inbound	no
Gofi	27	7	37-42	4.8	inbound	no
Gofi	27	8	43-46	7.5	inbound	no
Gofi	27	9	47-52	5.1	inbound	no
Gofi	27	10	53-57	8	inbound	no
Gofi	28	1	1-8	4.1	outbound	no
Gofi	28	2	9-14	5.5	outbound	no
Gofi	28	3	15-18	9	outbound	no
Gofi	28	4	19-23	6.4	outbound	no
Gofi	28	5	24-27	9.4	outbound	no
Gofi	28	6	28-30	11.2	outbound	no
Gofi	28	7	31-35	8.8	outbound	no
Gofi	28	8	36-38	7.5	outbound	no
Gofi	28	9	39-43	5.8	turning	no
Gofi	28	10	44-47	10.9	inbound	no
Gofi	30	1	1-5	3.6	outbound	no
Gofi	30	2	6-7	9	outbound	no
Gofi	30	3	8-9	8.5	outbound	no
Gofi	30	4	10-12	5.2	outbound	no
Gofi	30	5	13-14	7.6	outbound	no
Gofi	30	6	15-17	5.7	turning	no
Gofi	30	7	18	10.5	inbound	no
Gofi	30	8	19-20	12.7	inbound	no
Gofi	30	9	21	16.7	inbound	no
Gofi	30	10	22-23	15	inbound	no
Gofi	31	1	1-2	11.9	outbound	no
Gofi	31	2	3-4	11.3	outbound	no
Gofi	31	3	5-6	11.9	outbound	no
Gofi	31	4	7-8	10.6	outbound	no
Gofi	31	5	9-11	9.3	outbound	no
Gofi	31	6	12-17	4.7	turning	no
Gofi	31	7	18-20	7.8	inbound	no
Gofi	31	8	21-23	8.1	inbound	no
Gofi	31	9	24-25	14.2	inbound	no
Gofi	31	10	26-28	14.5	inbound	no
Gofi	33	1	1-2	8.5	outbound	no
Gofi	33	2	3-4	14.7	outbound	no
Gofi	33	3	5	20.8	outbound	no
Gofi	33	4	6-7	8.7	outbound	no
Gofi	33	5	8-9	13.9	outbound	no
Gofi	33	6	10-13	7.3	turning	no
Gofi	33	7	14-15	12.2	inbound	no
Gofi	33	8	16-17	13.7	inbound	no
Gofi	33	9	18-19	14.1	inbound	no
Gofi	33	10	20-22	8.1	inbound	no
Gofi	34	1	1-18	8.9	outbound	no
Gofi	34	2	19-29	14.9	outbound	no
Gofi	34	3	30-55	6.1	turning	no
Gofi	34	4	56-83	5.8	inbound	no
Gofi	34	5	84-102	7.7	inbound	no
Gofi	34	6	103-122	8	inbound	no
Gofi	34	7	123-142	7.7	inbound	no
Gofi	34	8	143-160	9.2	inbound	no
Gofi	34	9	161-178	9.1	inbound	no
Gofi	34	10	179-195	10.4	inbound	no
Gofi	35	1	1-3	10.7	outbound	no
Gofi	35	2	4-5	11	outbound	no
Gofi	35	3	6-7	13.9	outbound	no
Gofi	35	4	8-11	6.7	outbound	no
Gofi	35	5	12-16	5.7	turning	no
Gofi	35	6	17-18	12	inbound	no
Gofi	35	7	19-21	8.8	inbound	no
Gofi	35	8	22-23	9	inbound	no
Gofi	35	9	24-25	15.3	inbound	no
Gofi	35	10	26-30	9.4	inbound	no
Gofi	36	1	1-7	7.3	outbound	no
Gofi	36	2	8-10	16	outbound	no
Gofi	36	3	11-15	10.3	outbound	no
Gofi	36	4	16-22	7.2	turning	no
Gofi	36	5	23-27	8.6	inbound	no
Gofi	36	6	28-32	9.9	inbound	no
Gofi	36	7	33-38	8.1	inbound	no
Gofi	36	8	39-42	8.7	inbound	no
Gofi	36	9	43-45	15.3	inbound	no
Gofi	36	10	46-51	8.8	inbound	no
Gofi	37	1	1-3	6.3	outbound	no
Gofi	37	2	4-8	3.57	outbound	no
Gofi	37	3	9-11	5.2	outbound	no
Gofi	37	4	12-13	7.6	outbound	no
Gofi	37	5	14-15	9.4	outbound	no
Gofi	37	6	16-19	5.3	turning	no
Gofi	37	7	20-22	5.3	inbound	no
Gofi	37	8	23-24	8.5	inbound	no
Gofi	37	9	25-26	8.3	inbound	no
Gofi	37	10	27-29	8.6	inbound	no
Gofi	39	1	1-3	7.9	outbound	no
Gofi	39	2	4-5	10.7	outbound	no
Gofi	39	3	6-7	11.3	outbound	no
Gofi	39	4	8-9	17.9	outbound	no
Gofi	39	5	10-11	10.8	outbound	no
Gofi	39	6	12-14	5.1	turning	no
Gofi	39	7	15-17	7.7	inbound	no
Gofi	39	8	18-19	12	inbound	no
Gofi	39	9	20-23	6.5	inbound	no
Gofi	39	10	24-28	8.1	inbound	no
Gofi	40	1	1-9	3.39	outbound	no
Gofi	40	2	10-12	10.5	outbound	no
Gofi	40	3	13-15	9.1	outbound	no
Gofi	40	4	16-18	8.6	outbound	no
Gofi	40	5	19-20	14.7	outbound	no
Gofi	40	6	21-24	8.9	turning	no
Gofi	40	7	25-26	17.6	inbound	no
Gofi	40	8	27-31	6.2	inbound	no
Gofi	40	9	32-37	6.1	inbound	no
Gofi	40	10	38-43	6	inbound	no
Gofi	42	1	1-17	7.4	outbound	no
Gofi	42	2	18-32	8.1	outbound	no
Gofi	42	3	33-44	9.8	outbound	no
Gofi	42	4	45-65	5.9	outbound	no
Gofi	42	5	66-79	8.7	outbound	no
Gofi	42	6	80-99	6	turning	no
Gofi	42	7	100-116	6	inbound	no
Gofi	42	8	117-129	8.2	inbound	no
Gofi	42	9	130-142	9.6	inbound	no
Gofi	42	10	143-156	8.8	inbound	no
Gofi	43	1	1-7	12.1	outbound	no
Gofi	43	2	8-11	18	outbound	no
Gofi	43	3	12-21	9.2	outbound	no
Gofi	43	4	22-29	9.8	outbound	no
Gofi	43	5	30-37	9.7	outbound	no
Gofi	43	6	38-48	7	turning	no
Gofi	43	7	49-57	8.6	inbound	no
Gofi	43	8	58-65	10.1	inbound	no
Gofi	43	9	66-72	10.6	inbound	no
Gofi	43	10	73-79	11.4	inbound	no
Gofi	44	1	1-5	20.3	outbound	no
Gofi	44	2	6-10	16.1	outbound	no
Gofi	44	3	11-15	16.7	outbound	no
Gofi	44	4	16-21	16.4	outbound	no
Gofi	44	5	22-27	15.8	outbound	no
Gofi	44	6	28-34	13	outbound	no
Gofi	44	7	35-41	12.3	turning	no
Gofi	44	8	42-46	17	inbound	no
Gofi	44	9	47-53	13.5	inbound	no
Gofi	44	10	54-64	11.7	inbound	no
Gofi	45	1	1-6	11.4	outbound	no
Gofi	45	2	7-10	18.5	outbound	no
Gofi	45	3	11-15	15.2	outbound	no
Gofi	45	4	16-21	11.5	outbound	no
Gofi	45	5	22-27	11.9	outbound	no
Gofi	45	6	28-32	14.6	outbound	no
Gofi	45	7	33-38	13	turning	no
Gofi	45	8	39-42	16.6	inbound	no
Gofi	45	9	43-47	15	inbound	no
Gofi	45	10	48-53	15.1	inbound	no
Gofi	46	1	1-20	13.9	outbound	no
Gofi	46	2	21-40	13.4	outbound	no
Gofi	46	3	41-61	13.2	outbound	no
Gofi	46	4	62-81	11.1	outbound	no
Gofi	46	5	82-97	11.6	outbound	no
Gofi	46	6	98-128	6.9	turning	no
Gofi	46	7	129-147	8.6	inbound	no
Gofi	46	8	148-167	9.3	inbound	no
Gofi	46	9	168-200	8.2	inbound	no
Gofi	46	10	201-228	9.8	inbound	no
Gofi	47	1	1-4	16.4	outbound	no
Gofi	47	2	5-9	14.3	outbound	no
Gofi	47	3	10-13	21.2	outbound	no
Gofi	47	4	14-17	19	outbound	no
Gofi	47	5	18-26	7.8	turning	no
Gofi	47	6	27-33	10.9	inbound	no
Gofi	47	7	34-38	13	inbound	no
Gofi	47	8	39-45	11.5	inbound	no
Gofi	47	9	46-50	14.5	inbound	no
Gofi	47	10	51-56	13.5	inbound	no
Gofi	48	1	1-3	18.6	outbound	no
Gofi	48	2	4-7	12.9	outbound	no
Gofi	48	3	8-11	13.2	outbound	no
Gofi	48	4	12-14	16.6	outbound	no
Gofi	48	5	15-17	17	outbound	no
Gofi	48	6	18-22	11	turning	no
Gofi	48	7	23-26	12.6	inbound	no
Gofi	48	8	27-29	13	inbound	no
Gofi	48	9	30-33	12.8	inbound	no
Gofi	48	10	34-37	14.6	inbound	no
Gofi	49	1	1-4	14.1	outbound	no
Gofi	49	2	5-6	25.8	outbound	no
Gofi	49	3	7-9	16.4	outbound	no
Gofi	49	4	10-14	9.3	turning	yes
Gofi	49	5	15-17	14.2	inbound	no
Gofi	49	6	18-20	15.9	inbound	no
Gofi	49	7	21-25	9.8	inbound	no
Gofi	49	8	26-30	8.4	inbound	no
Gofi	49	9	31-35	9.1	inbound	no
Gofi	49	10	36-40	11.7	inbound	no
Gofi	50	1	1-4	9.3	outbound	no
Gofi	50	2	5-8	8.5	outbound	no
Gofi	50	3	9-11	10.2	outbound	no
Gofi	50	4	12-13	14.6	outbound	no
Gofi	50	5	14-16	12.8	outbound	no
Gofi	50	6	17-19	9.3	turning	no
Gofi	50	7	20-21	16.7	inbound	no
Gofi	50	8	22-26	7.3	inbound	no
Gofi	50	9	27-29	11.9	inbound	no
Gofi	50	10	30-33	13	inbound	no
Gofi	51	1	1-3	11.2	outbound	no
Gofi	51	2	4-6	9.2	outbound	no
Gofi	51	3	7-9	12.8	outbound	no
Gofi	51	4	10-11	15.1	outbound	no
Gofi	51	5	12-14	10.5	turning	yes
Gofi	51	6	15-16	11.1	inbound	no
Gofi	51	7	17-19	10.6	inbound	no
Gofi	51	8	20-22	9.4	inbound	no
Gofi	51	9	23-24	12.6	inbound	no
Gofi	51	10	25-28	11	inbound	no
Gofi	54	1	1-5	6	outbound	no
Gofi	54	2	6-9	6.4	outbound	no
Gofi	54	3	10-11	11.2	outbound	no
Gofi	54	4	12-13	18.2	outbound	no
Gofi	54	5	14-15	12.1	outbound	no
Gofi	54	6	16-18	8.7	turning	no
Gofi	54	7	19-21	12.9	inbound	no
Gofi	54	8	22-25	7.6	inbound	no
Gofi	54	9	26-28	10.1	inbound	no
Gofi	54	10	29-35	5.4	inbound	no
Gofi	55	1	1-2	21.2	outbound	no
Gofi	55	2	3-4	19.8	outbound	no
Gofi	55	3	5-8	11.8	outbound	no
Gofi	55	4	9-11	12.3	outbound	no
Gofi	55	5	12-14	14.6	outbound	no
Gofi	55	6	15-20	7.3	turning	no
Gofi	55	7	21-25	7.8	inbound	no
Gofi	55	8	26-31	8	inbound	no
Gofi	55	9	32-39	5.9	inbound	no
Gofi	55	10	40-46	6.6	inbound	no
Gofi	56	1	1-10	9.2	outbound	no
Gofi	56	2	11-18	11.7	outbound	no
Gofi	56	3	19-24	12.7	outbound	no
Gofi	56	4	25-31	10.5	outbound	no
Gofi	56	5	32-42	9.6	outbound	no
Gofi	56	6	43-62	4.9	turning	no
Gofi	56	7	63-80	5.6	inbound	no
Gofi	56	8	81-95	5.8	inbound	no
Gofi	56	9	96-113	5.5	inbound	no
Gofi	56	10	114-122	12.3	inbound	no
Gofi	57	1	1-5	6.5	outbound	no
Gofi	57	2	6-10	5.8	outbound	no
Gofi	57	3	11-14	8.7	outbound	no
Gofi	57	4	15-17	9.6	outbound	no
Gofi	57	5	18-21	8.3	turning	no
Gofi	57	6	22-23	14.8	inbound	no
Gofi	57	7	24-25	23.5	inbound	no
Gofi	57	8	26-27	15.5	inbound	no
Gofi	57	9	28-30	10.6	inbound	no
Gofi	57	10	31-33	11.2	inbound	no
Hard	2	1	1	12.3	outbound	no
Hard	2	2	2	19.5	outbound	no
Hard	2	3	3-4	12	outbound	no
Hard	2	4	5-7	8.8	outbound	no
Hard	2	5	8	17.2	outbound	no
Hard	2	6	9-11	3.31	turning	no
Hard	2	7	12	21.6	inbound	no
Hard	2	8	13	22.7	inbound	no
Hard	2	9	14	22.4	inbound	no
Hard	2	10	15-17	11.1	inbound	no
Hard	3	1	1-8	7.5	outbound	no
Hard	3	2	9-12	17.1	outbound	no
Hard	3	3	13-14	27	outbound	no
Hard	3	4	15-17	22.7	outbound	no
Hard	3	5	18-19	24.2	outbound	no
Hard	3	6	20-22	23.1	outbound	no
Hard	3	7	23-28	11.3	turning	no
Hard	3	8	29-32	15.8	inbound	no
Hard	3	9	33-36	14.7	inbound	no
Hard	3	10	37-43	13	inbound	no
Hard	4	1	1-4	17.7	outbound	no
Hard	4	2	5-8	19.1	outbound	no
Hard	4	3	9-14	12.9	outbound	no
Hard	4	4	15-25	7.4	outbound	no
Hard	4	5	26-29	17	outbound	no
Hard	4	6	30-32	19.9	outbound	no
Hard	4	7	33-42	8.2	turning	no
Hard	4	8	43-50	10.7	inbound	no
Hard	4	9	51-57	10.4	inbound	no
Hard	4	10	58-64	13.9	inbound	no
Hard	6	1	1-12	10.7	outbound	no
Hard	6	2	13-23	12.1	outbound	no
Hard	6	3	24-33	12.7	outbound	no
Hard	6	4	34-43	13.2	turning	no
Hard	6	5	44-52	2.51	inbound	no
Hard	6	6	53-62	12.1	inbound	no
Hard	6	7	63-75	9.6	inbound	no
Hard	6	8	76-85	12.5	inbound	no
Hard	6	9	86-97	11.7	inbound	no
Hard	6	10	98-109	12.4	inbound	no
Hard	7	1	1-5	12.2	outbound	no
Hard	7	2	6-10	11.1	outbound	no
Hard	7	3	11-14	10.2	outbound	no
Hard	7	4	15-18	15	outbound	no
Hard	7	5	19-23	14.7	outbound	no
Hard	7	6	24-28	9.7	turning	no
Hard	7	7	29-33	11.5	inbound	no
Hard	7	8	34-39	12	inbound	no
Hard	7	9	40-45	11.9	inbound	no
Hard	7	10	46-55	7.7	inbound	no
Hard	8	1	1-8	6.8	outbound	no
Hard	8	2	9-16	8	outbound	no
Hard	8	3	17-25	7.2	outbound	no
Hard	8	4	26-29	16.4	outbound	no
Hard	8	5	30-34	12.3	outbound	no
Hard	8	6	35-40	9.9	outbound	no
Hard	8	7	41-46	8.7	turning	yes
Hard	8	8	47-54	6.8	inbound	no
Hard	8	9	55-62	7.8	inbound	no
Hard	8	10	63-72	6.3	inbound	no
Hard	9	1	1-5	16.8	outbound	no
Hard	9	2	6-14	9.7	outbound	no
Hard	9	3	15-21	12	outbound	no
Hard	9	4	22-28	11.8	outbound	no
Hard	9	5	29-36	10.1	outbound	no
Hard	9	6	37-45	8.9	outbound	no
Hard	9	7	46-55	8.3	turning	no
Hard	9	8	56-65	8.3	inbound	no
Hard	9	9	66-75	8.3	inbound	no
Hard	9	10	76-91	5.5	inbound	no
Hard	10	1	1	22	outbound	no
Hard	10	2	2-4	7.1	outbound	no
Hard	10	3	5-10	3.8	outbound	no
Hard	10	4	11-13	6.2	outbound	no
Hard	10	5	14-16	8.5	outbound	no
Hard	10	6	17-21	4.1	turning	no
Hard	10	7	22-23	13.5	inbound	no
Hard	10	8	24-25	11	inbound	no
Hard	10	9	26-27	13.2	inbound	no
Hard	10	10	28-30	10.2	inbound	no
Hard	13	1	1-6	10.3	outbound	no
Hard	13	2	7-12	10.2	outbound	no
Hard	13	3	13-19	8.6	outbound	no
Hard	13	4	20-24	13.7	outbound	no
Hard	13	5	25-30	11	outbound	no
Hard	13	6	31-35	12.9	outbound	no
Hard	13	7	36-44	7.4	turning	no
Hard	13	8	45-51	8.8	inbound	no
Hard	13	9	52-58	11	inbound	no
Hard	13	10	59-65	10.8	inbound	no
Hard	14	1	1	19.8	outbound	no
Hard	14	2	2	20.8	outbound	no
Hard	14	3	3-5	8.5	outbound	no
Hard	14	4	6	19.2	outbound	no
Hard	14	5	7	20.8	outbound	no
Hard	14	6	8-9	9.9	outbound	no
Hard	14	7	10-11	12	outbound	no
Hard	14	8	12-13	9	turning	no
Hard	14	9	14-15	9.7	inbound	no
Hard	14	10	16-18	12.5	inbound	no
Hard	15	1	1-12	18.7	outbound	no
Hard	15	2	13-22	22.1	outbound	no
Hard	15	3	23-37	15.7	outbound	no
Hard	15	4	38-53	14.7	turning	no
Hard	15	5	54-67	15.5	inbound	no
Hard	15	6	68-81	16	inbound	no
Hard	15	7	82-94	16.4	inbound	no
Hard	15	8	95-109	16.3	inbound	no
Hard	15	9	110-122	16.7	inbound	no
Hard	15	10	123-138	15	inbound	no
Hard	18	1	1-21	5.5	outbound	no
Hard	18	2	22-29	16.6	outbound	no
Hard	18	3	30-40	12.6	outbound	no
Hard	18	4	41-56	7.4	outbound	no
Hard	18	5	57-71	8.8	outbound	no
Hard	18	6	72-79	16.3	turning	yes
Hard	18	7	80-98	6	inbound	no
Hard	18	8	99-113	9	inbound	no
Hard	18	9	114-122	15.4	inbound	no
Hard	18	10	123-135	10.9	inbound	no
Vendy	1	1	1-6	4.1	outbound	no
Vendy	1	2	7-23	2.18	outbound	no
Vendy	1	3	24-34	2.09	outbound	no
Vendy	1	4	35-52	2.34	outbound	no
Vendy	1	5	53-59	4.7	turning	no
Vendy	1	6	60-61	10.6	inbound	no
Vendy	1	7	62-66	6.4	inbound	no
Vendy	1	8	67-69	6.8	inbound	no
Vendy	1	9	70-74	4.6	inbound	no
Vendy	1	10	75-77	7.2	inbound	no
Vendy	5	1	1-13	5.5	outbound	no
Vendy	5	2	14-28	4.6	outbound	no
Vendy	5	3	29-36	8.1	outbound	no
Vendy	5	4	37-48	5.8	outbound	no
Vendy	5	5	49-62	4.1	outbound	no
Vendy	5	6	63-75	5	outbound	no
Vendy	5	7	76-84	7.8	turning	yes
Vendy	5	8	85-92	9.1	inbound	no
Vendy	5	9	93-102	6.2	inbound	no
Vendy	5	10	103-114	5.4	inbound	no
Vendy	6	1	1-8	6.1	outbound	no
Vendy	6	2	9-17	5.7	outbound	no
Vendy	6	3	18-24	5.9	outbound	no
Vendy	6	4	25-33	5.3	outbound	no
Vendy	6	5	34-45	4.2	outbound	no
Vendy	6	6	46-50	9.6	outbound	no
Vendy	6	7	51-56	8.3	outbound	no
Vendy	6	8	57-63	6.2	turning	no
Vendy	6	9	64-70	7.4	inbound	no
Vendy	6	10	71-79	5.9	inbound	no
Vendy	7	1	1-23	3.9	outbound	no
Vendy	7	2	24-37	6.3	outbound	no
Vendy	7	3	38-46	9.4	outbound	no
Vendy	7	4	47-54	11	outbound	no
Vendy	7	5	55-69	5.7	outbound	no
Vendy	7	6	70-81	7.2	outbound	no
Vendy	7	7	82-94	6.5	turning	no
Vendy	7	8	95-100	14	inbound	no
Vendy	7	9	101-106	13.8	inbound	no
Vendy	7	10	107-119	7.1	inbound	no
Vendy	8	1	1-10	6	outbound	no
Vendy	8	2	11-19	6.9	outbound	no
Vendy	8	3	20-26	8.5	outbound	no
Vendy	8	4	27-33	7.1	outbound	no
Vendy	8	5	34-43	5.8	outbound	no
Vendy	8	6	44-54	5.1	turning	no
Vendy	8	7	55-61	9.3	inbound	no
Vendy	8	8	62-67	10.1	inbound	no
Vendy	8	9	68-74	7.2	inbound	no
Vendy	8	10	75-84	6.8	inbound	no
Vendy	9	1	1-7	7	outbound	no
Vendy	9	2	8-13	8.2	outbound	no
Vendy	9	3	14-20	6.1	outbound	no
Vendy	9	4	21-25	9.1	outbound	no
Vendy	9	5	26-34	5	turning	no
Vendy	9	6	35-39	6.5	inbound	no
Vendy	9	7	40-44	9.4	inbound	no
Vendy	9	8	45-49	8.1	inbound	no
Vendy	9	9	50-55	7.8	inbound	no
Vendy	9	10	56-60	9	inbound	no
Vendy	10	1	1-4	16	outbound	no
Vendy	10	2	5-11	8.7	outbound	no
Vendy	10	3	12-19	7.4	outbound	no
Vendy	10	4	20-27	7.6	outbound	no
Vendy	10	5	28-36	6.6	outbound	no
Vendy	10	6	37-41	13.3	outbound	no
Vendy	10	7	42-48	8.6	turning	no
Vendy	10	8	49-54	9.3	inbound	no
Vendy	10	9	55-61	8.3	inbound	no
Vendy	10	10	62-68	10.1	inbound	no
Vendy	13	1	1-5	7.5	outbound	no
Vendy	13	2	6-11	7.1	outbound	no
Vendy	13	3	12-16	7.3	outbound	no
Vendy	13	4	17-20	10.2	outbound	no
Vendy	13	5	21-25	8.4	outbound	no
Vendy	13	6	26-31	6.3	outbound	no
Vendy	13	7	32-37	6.2	turning	no
Vendy	13	8	38-41	8.9	inbound	no
Vendy	13	9	42-44	13.4	inbound	no
Vendy	13	10	45-48	13.8	inbound	no
Vendy	14	1	1-14	5.9	outbound	no
Vendy	14	2	15-38	3.41	outbound	no
Vendy	14	3	39-45	11.3	outbound	no
Vendy	14	4	46-52	12	outbound	no
Vendy	14	5	53-60	10.3	turning	yes
Vendy	14	6	61-70	8.5	inbound	no
Vendy	14	7	71-79	8.8	inbound	no
Vendy	14	8	80-93	6	inbound	no
Vendy	14	9	94-106	7.1	inbound	no
Vendy	14	10	107-118	8.2	inbound	no
Vendy	15	1	1-6	6.3	outbound	no
Vendy	15	2	7-10	9.7	outbound	no
Vendy	15	3	11-16	7.4	outbound	no
Vendy	15	4	17-19	15.3	outbound	no
Vendy	15	5	20-23	11.1	outbound	no
Vendy	15	6	24-30	6.2	turning	no
Vendy	15	7	31-34	9.1	inbound	no
Vendy	15	8	35-37	11.1	inbound	no
Vendy	15	9	38-41	11.1	inbound	no
Vendy	15	10	42-49	6.8	inbound	no
Vendy	18	1	1-4	19.1	outbound	no
Vendy	18	2	5-10	14.6	outbound	no
Vendy	18	3	11-18	10.1	outbound	no
Vendy	18	4	19-25	11.8	outbound	no
Vendy	18	5	26-32	12.7	outbound	no
Vendy	18	6	33-50	4.5	turning	no
Vendy	18	7	51-67	4.6	inbound	no
Vendy	18	8	68-83	5.3	inbound	no
Vendy	18	9	84-99	5.2	inbound	no
Vendy	18	10	100-122	3.9	inbound	no
Vendy	19	1	1-5	13.8	outbound	no
Vendy	19	2	6-9	17.8	outbound	no
Vendy	19	3	10-16	9.1	outbound	no
Vendy	19	4	17-22	12.5	outbound	no
Vendy	19	5	23-27	11.9	outbound	no
Vendy	19	6	28-35	7.5	turning	no
Vendy	19	7	36-42	10.8	inbound	no
Vendy	19	8	43-48	10.5	inbound	no
Vendy	19	9	49-53	13.9	inbound	no
Vendy	19	10	54-59	14.8	inbound	no
Vendy	20	1	1-9	8.2	outbound	no
Vendy	20	2	10-20	6.3	outbound	no
Vendy	20	3	21-29	6.8	outbound	no
Vendy	20	4	30-36	10.4	outbound	no
Vendy	20	5	37-42	10.7	outbound	no
Vendy	20	6	43-49	9.4	outbound	no
Vendy	20	7	50-56	5	turning	no
Vendy	20	8	57-63	9	inbound	no
Vendy	20	9	64-72	8.6	inbound	no
Vendy	20	10	73-92	4	inbound	no
Vendy	21	1	1-11	11.1	outbound	no
Vendy	21	2	12-21	12.7	outbound	no
Vendy	21	3	22-33	7.8	outbound	no
Vendy	21	4	34-51	6.2	outbound	no
Vendy	21	5	52-80	4.1	turning	no
Vendy	21	6	81-100	4.5	inbound	no
Vendy	21	7	101-131	3.8	inbound	no
Vendy	21	8	132-184	2.45	inbound	no
Vendy	21	9	185-207	5.3	inbound	no
Vendy	21	10	208-229	6.1	inbound	no
Vendy	22	1	1-11	8	outbound	no
Vendy	22	2	12-23	7.4	outbound	no
Vendy	22	3	24-32	11.1	outbound	no
Vendy	22	4	33-42	8.7	outbound	no
Vendy	22	5	43-53	7.8	outbound	no
Vendy	22	6	54-67	6.9	turning	no
Vendy	22	7	68-80	7.3	inbound	no
Vendy	22	8	81-94	6.7	inbound	no
Vendy	22	9	95-103	10.6	inbound	no
Vendy	22	10	104-112	10.6	inbound	no
Vendy	23	1	1-10	6	outbound	no
Vendy	23	2	11-17	9	outbound	no
Vendy	23	3	18-25	7.9	outbound	no
Vendy	23	4	26-33	8.6	outbound	no
Vendy	23	5	34-37	14.4	outbound	no
Vendy	23	6	38-42	13.6	turning	no
Vendy	23	7	43-46	14.3	inbound	no
Vendy	23	8	47-51	13.9	inbound	no
Vendy	23	9	52-56	12.9	inbound	no
Vendy	23	10	57-62	11.6	inbound	no
Vendy	24	1	1-5	9.1	outbound	no
Vendy	24	2	6-9	11.8	outbound	no
Vendy	24	3	10-13	10.9	outbound	no
Vendy	24	4	14-19	8.4	outbound	no
Vendy	24	5	20-25	8.2	outbound	no
Vendy	24	6	26-34	6	turning	no
Vendy	24	7	35-40	8.2	inbound	no
Vendy	24	8	41-45	8.9	inbound	no
Vendy	24	9	46-50	10.8	inbound	no
Vendy	24	10	51-56	9.9	inbound	no
Albi	1	1	1-16	3.7	outbound	no
Albi	1	2	17-24	7.3	outbound	no
Albi	1	3	25-29	11.2	outbound	no
Albi	1	4	30-35	8.1	outbound	no
Albi	1	5	36-43	7.1	outbound	no
Albi	1	6	44-49	9.6	outbound	no
Albi	1	7	50-56	8.5	turning	no
Albi	1	8	57-62	9.7	inbound	no
Albi	1	9	63-68	10	inbound	no
Albi	1	10	69-74	10.6	inbound	no
Albi	5	1	1-5	6.9	outbound	no
Albi	5	2	6-9	8.2	outbound	no
Albi	5	3	10-13	9.2	outbound	no
Albi	5	4	14-19	6.3	outbound	no
Albi	5	5	20-25	6.1	turning	no
Albi	5	6	26-31	7.2	inbound	no
Albi	5	7	32-35	7	inbound	no
Albi	5	8	36-38	13.2	inbound	no
Albi	5	9	39-42	8.4	inbound	no
Albi	5	10	43-48	7.5	inbound	no
Albi	8	1	1-14	8.2	outbound	no
Albi	8	2	15-28	8	outbound	no
Albi	8	3	29-37	10.3	outbound	no
Albi	8	4	38-47	11.5	outbound	no
Albi	8	5	48-59	10.4	outbound	no
Albi	8	6	60-72	9.2	outbound	no
Albi	8	7	73-80	9.7	outbound	no
Albi	8	8	81-88	6.9	turning	no
Albi	8	9	89-92	9.9	inbound	no
Albi	8	10	93-95	7.6	inbound	no
Albi	12	1	1-6	6.1	outbound	no
Albi	12	2	7-14	3.8	outbound	no
Albi	12	3	15-20	6.8	outbound	no
Albi	12	4	21-28	3.25	outbound	no
Albi	12	5	29-35	4.9	outbound	no
Albi	12	6	36-43	3.9	turning	no
Albi	12	7	44-48	6.2	inbound	no
Albi	12	8	49-52	9.2	inbound	no
Albi	12	9	53-55	11.8	inbound	no
Albi	12	10	56-63	5.1	inbound	no
Albi	13	1	1-5	5.1	outbound	no
Albi	13	2	6-7	10.8	outbound	no
Albi	13	3	8-9	10.3	outbound	no
Albi	13	4	10-11	7.5	outbound	no
Albi	13	5	12-13	9	outbound	no
Albi	13	6	14-18	3.43	turning	no
Albi	13	7	19-20	11.6	inbound	no
Albi	13	8	21-22	12.1	inbound	no
Albi	13	9	23-24	9.6	inbound	no
Albi	13	10	25-28	5.9	inbound	no
Albi	15	1	1-15	7.3	outbound	no
Albi	15	2	16-28	8.4	outbound	no
Albi	15	3	29-39	9.7	outbound	no
Albi	15	4	40-55	6.4	outbound	no
Albi	15	5	56-76	5.2	outbound	no
Albi	15	6	77-85	12.9	outbound	no
Albi	15	7	86-101	7.5	turning	no
Albi	15	8	102-110	12.2	inbound	no
Albi	15	9	110-119	12.6	inbound	no
Albi	15	10	120-133	9.2	inbound	no
Albi	16	1	1-5	5.6	outbound	no
Albi	16	2	6-8	9.7	outbound	no
Albi	16	3	9-11	9.3	outbound	no
Albi	16	4	12-15	7.8	outbound	no
Albi	16	5	16-20	5.7	turning	no
Albi	16	6	21-24	6.8	inbound	no
Albi	16	7	25-27	9.5	inbound	no
Albi	16	8	28-32	7.3	inbound	no
Albi	16	9	33-37	6.5	inbound	no
Albi	16	10	38-41	9	inbound	no
Albi	17	1	1-19	9.8	outbound	no
Albi	17	2	20-35	11.2	outbound	no
Albi	17	3	36-46	16.1	outbound	no
Albi	17	4	47-75	6.5	turning	no
Albi	17	5	76-99	7.5	inbound	no
Albi	17	6	100-121	8.5	inbound	no
Albi	17	7	122-142	9.1	inbound	no
Albi	17	8	143-178	5.1	inbound	no
Albi	17	9	179-204	7.1	inbound	no
Albi	17	10	205-225	8.2	inbound	no
Albi	19	1	1-19	8.6	outbound	no
Albi	19	2	20-31	11.5	outbound	no
Albi	19	3	32-37	10.9	outbound	no
Albi	19	4	38-47	9.3	turning	no
Albi	19	5	48-57	9.4	inbound	no
Albi	19	6	58-68	10.2	inbound	no
Albi	19	7	69-85	8.8	inbound	no
Albi	19	8	86-102	10.6	inbound	no
Albi	19	9	103-124	8	inbound	no
Albi	19	10	125-147	8.8	inbound	no
Albi	21	1	1-27	5.6	outbound	no
Albi	21	2	28-44	8.2	outbound	no
Albi	21	3	45-58	8.8	outbound	no
Albi	21	4	59-71	9.8	outbound	no
Albi	21	5	72-95	5.7	outbound	no
Albi	21	6	96-119	5.3	turning	no
Albi	21	7	120-132	11.3	inbound	no
Albi	21	8	133-140	11.5	inbound	no
Albi	21	9	141-156	8.5	inbound	no
Albi	21	10	157-175	8.4	inbound	no
Albi	22	1	1-14	7.7	outbound	no
Albi	22	2	15-30	6.8	outbound	no
Albi	22	3	31-39	12.3	outbound	no
Albi	22	4	40-48	12.5	outbound	no
Albi	22	5	49-58	10.2	outbound	no
Albi	22	6	59-68	10.4	turning	yes
Albi	22	7	69-80	8.6	inbound	no
Albi	22	8	81-93	7.4	inbound	no
Albi	22	9	94-107	7.6	inbound	no
Albi	22	10	108-125	6.4	inbound	no
Albi	24	1	1-17	4	outbound	no
Albi	24	2	18-30	5.6	outbound	no
Albi	24	3	31-40	6.6	outbound	no
Albi	24	4	41-47	9.3	outbound	no
Albi	24	5	48-57	6.8	outbound	no
Albi	24	6	58-70	5	turning	no
Albi	24	7	71-78	8.1	inbound	no
Albi	24	8	79-87	7.9	inbound	no
Albi	24	9	88-96	7.8	inbound	no
Albi	24	10	97-111	5.3	inbound	no
Albi	27	1	1-4	7.6	outbound	no
Albi	27	2	5-9	7	outbound	no
Albi	27	3	10-12	11.2	outbound	no
Albi	27	4	13-14	14.6	outbound	no
Albi	27	5	15-24	3.6	turning	no
Albi	27	6	25-31	4	inbound	no
Albi	27	7	32-35	8.9	inbound	no
Albi	27	8	36-39	9.2	inbound	no
Albi	27	9	40-44	6	inbound	no
Albi	27	10	45-49	8.3	inbound	no
Albi	29	1	1-3	10.4	outbound	no
Albi	29	2	4-8	6.7	outbound	no
Albi	29	3	9-13	6.8	outbound	no
Albi	29	4	14-18	7.3	outbound	no
Albi	29	5	19-25	4.9	turning	no
Albi	29	6	26-28	8.9	inbound	no
Albi	29	7	29-31	9.2	inbound	no
Albi	29	8	32-34	10.3	inbound	no
Albi	29	9	35-37	11.7	inbound	no
Albi	29	10	38-41	9.4	inbound	no
Albi	33	1	1-3	12.5	outbound	no
Albi	33	2	4-7	7.6	outbound	no
Albi	33	3	8-11	6.6	outbound	no
Albi	33	4	12-13	12.9	outbound	no
Albi	33	5	14-19	5.3	outbound	no
Albi	33	6	20-24	6.1	turning	no
Albi	33	7	25-27	9.6	inbound	no
Albi	33	8	28-32	6.1	inbound	no
Albi	33	9	33-35	10.3	inbound	no
Albi	33	10	36-41	6.5	inbound	no
Albi	34	1	1-4	6.4	outbound	no
Albi	34	2	5-9	6.4	outbound	no
Albi	34	3	10-13	8.8	outbound	no
Albi	34	4	14-20	3.8	turning	no
Albi	34	5	21-26	5.2	inbound	no
Albi	34	6	27-30	6.9	inbound	no
Albi	34	7	31-36	5.7	inbound	no
Albi	34	8	37-40	7.6	inbound	no
Albi	34	9	41-44	6.1	inbound	no
Albi	34	10	45-49	7.6	inbound	no
Albi	36	1	1-17	4	outbound	no
Albi	36	2	18-35	4	outbound	no
Albi	36	3	36-43	8.2	outbound	no
Albi	36	4	44-53	6.8	outbound	no
Albi	36	5	54-59	9.5	outbound	no
Albi	36	6	60-68	7	outbound	no
Albi	36	7	69-79	6.1	turning	no
Albi	36	8	80-89	7.3	inbound	no
Albi	36	9	90-97	8.5	inbound	no
Albi	36	10	98-105	8.2	inbound	no
Albi	40	1	1-13	4.9	outbound	no
Albi	40	2	14-23	6.4	outbound	no
Albi	40	3	24-33	7.1	outbound	no
Albi	40	4	34-44	6	outbound	no
Albi	40	5	45-51	9.2	outbound	no
Albi	40	6	52-60	5.4	turning	yes
Albi	40	7	61-72	4.7	inbound	no
Albi	40	8	73-81	7.2	inbound	no
Albi	40	9	82-90	7	inbound	no
Albi	40	10	91-104	5.1	inbound	no
Albi	42	1	1-17	9.7	outbound	no
Albi	42	2	18-33	10	outbound	no
Albi	42	3	34-49	10.5	outbound	no
Albi	42	4	50-65	9.6	outbound	no
Albi	42	5	66-82	9.8	outbound	no
Albi	42	6	83-111	5.4	turning	no
Albi	42	7	112-128	9.3	inbound	no
Albi	42	8	129-145	9.6	inbound	no
Albi	42	9	146-164	8.3	inbound	no
Albi	42	10	165-182	9.6	inbound	no
Albi	43	1	1-6	7	outbound	no
Albi	43	2	7-11	7.9	outbound	no
Albi	43	3	12-19	8.7	outbound	no
Albi	43	4	20-31	5.8	outbound	no
Albi	43	5	32-40	7.9	outbound	no
Albi	43	6	41-49	8.4	outbound	no
Albi	43	7	50-57	9.5	outbound	no
Albi	43	8	58-66	7.9	turning	no
Albi	43	9	67-72	11.4	inbound	no
Albi	43	10	73-83	7.9	inbound	no
Albi	45	1	1-11	6.5	outbound	no
Albi	45	2	12-21	6	outbound	no
Albi	45	3	22-28	6.9	outbound	no
Albi	45	4	29-34	6	outbound	no
Albi	45	5	35-45	5.3	turning	no
Albi	45	6	46-57	5.7	inbound	no
Albi	45	7	58-66	7	inbound	no
Albi	45	8	67-76	5.8	inbound	no
Albi	45	9	77-91	4.8	inbound	no
Albi	45	10	92-106	5.2	inbound	no
Albi	46	1	1-16	8.8	outbound	no
Albi	46	2	17-29	10.9	outbound	no
Albi	46	3	30-48	6.8	outbound	no
Albi	46	4	49-71	5.6	outbound	no
Albi	46	5	72-84	10.5	outbound	no
Albi	46	6	85-110	4.9	turning	no
Albi	46	7	111-123	10.5	inbound	no
Albi	46	8	124-139	8.7	inbound	no
Albi	46	9	140-159	7.1	inbound	no
Albi	46	10	160-173	10.6	inbound	no
Albi	49	1	1-10	7.3	outbound	no
Albi	49	2	11-17	11	outbound	no
Albi	49	3	18-29	6	outbound	no
Albi	49	4	30-36	10.7	outbound	no
Albi	49	5	37-43	10.9	outbound	no
Albi	49	6	44-53	7.8	outbound	no
Albi	49	7	54-64	6.4	turning	no
Albi	49	8	65-77	5.8	inbound	no
Albi	49	9	78-86	8.8	inbound	no
Albi	49	10	87-96	8.4	inbound	no
Albi	50	1	1-26	5.6	outbound	no
Albi	50	2	27-43	10.5	outbound	no
Albi	50	3	44-58	11.6	outbound	no
Albi	50	4	59-76	9.4	outbound	no
Albi	50	5	77-96	9.1	turning	no
Albi	50	6	97-110	11.8	inbound	no
Albi	50	7	111-128	9.4	inbound	no
Albi	50	8	129-147	9.1	inbound	no
Albi	50	9	148-174	6.1	inbound	no
Albi	50	10	175-207	5.1	inbound	no
Albi	56	1	1-10	10.2	outbound	no
Albi	56	2	11-25	6.6	outbound	no
Albi	56	3	26-32	12.8	outbound	no
Albi	56	4	33-41	10.2	outbound	no
Albi	56	5	42-57	6.3	outbound	no
Albi	56	6	58-76	5.2	turning	no
Albi	56	7	77-89	7.3	inbound	no
Albi	56	8	90-105	6.4	inbound	no
Albi	56	9	106-119	6.7	inbound	no
Albi	56	10	120-132	8.2	inbound	no
Albi	57	1	1-3	13.1	outbound	no
Albi	57	2	4-8	8.8	outbound	no
Albi	57	3	9-13	8.3	outbound	no
Albi	57	4	14-18	8.8	turning	yes
Albi	57	5	19-22	10.8	inbound	no
Albi	57	6	23-26	12.5	inbound	no
Albi	57	7	27-31	7.2	inbound	no
Albi	57	8	32-35	10.9	inbound	no
Albi	57	9	36-39	9.5	inbound	no
Albi	57	10	40-45	8.2	inbound	no
Albi	58	1	1-6	6.4	outbound	no
Albi	58	2	7-10	7.7	outbound	no
Albi	58	3	11-15	7.3	outbound	no
Albi	58	4	16-20	7.4	outbound	no
Albi	58	5	21-26	6.6	outbound	no
Albi	58	6	27-33	4.8	outbound	no
Albi	58	7	34-36	11.8	outbound	no
Albi	58	8	37-42	5.9	turning	yes
Albi	58	9	43-46	8.3	inbound	no
Albi	58	10	47-51	9.3	inbound	no
Albi	59	1	1-13	8.6	outbound	no
Albi	59	2	14-28	7.8	outbound	no
Albi	59	3	29-42	8.5	outbound	no
Albi	59	4	43-62	5.5	outbound	no
Albi	59	5	63-79	6.9	outbound	no
Albi	59	6	80-95	7.2	turning	no
Albi	59	7	96-107	10.1	inbound	no
Albi	59	8	108-122	7.3	inbound	no
Albi	59	9	123-138	7.3	inbound	no
Albi	59	10	139-153	8.1	inbound	no
Albi	61	1	1-20	4	outbound	no
Albi	61	2	21-31	7.2	outbound	no
Albi	61	3	32-39	8.5	outbound	no
Albi	61	4	40-50	7.4	outbound	no
Albi	61	5	51-62	7	outbound	no
Albi	61	6	63-71	7.3	outbound	no
Albi	61	7	72-84	5.2	outbound	no
Albi	61	8	85-95	7	turning	no
Albi	61	9	96-105	7.8	inbound	no
Albi	61	10	106-115	9.6	inbound	no
Albi	62	1	1-14	11.4	outbound	no
Albi	62	2	15-32	10	outbound	no
Albi	62	3	33-49	8.9	outbound	no
Albi	62	4	50-68	9	outbound	no
Albi	62	5	69-87	9.6	outbound	no
Albi	62	6	88-106	8.8	outbound	no
Albi	62	7	107-126	9.3	outbound	no
Albi	62	8	127-148	8.5	outbound	no
Albi	62	9	149-174	6.9	turning	no
Albi	62	10	175-196	8.8	inbound	no
Albi	63	1	1-17	5.6	outbound	no
Albi	63	2	18-34	5.9	outbound	no
Albi	63	3	35-55	4.7	outbound	no
Albi	63	4	56-70	6.7	outbound	no
Albi	63	5	71-81	8.7	outbound	no
Albi	63	6	82-98	5.6	outbound	no
Albi	63	7	99-116	5.5	turning	no
Albi	63	8	117-129	7.3	inbound	no
Albi	63	9	130-142	6.9	inbound	no
Albi	63	10	143-154	7.9	inbound	no
Albi	64	1	1-9	8	outbound	no
Albi	64	2	10-18	7.7	outbound	no
Albi	64	3	19-26	7.7	outbound	no
Albi	64	4	27-32	8.3	outbound	no
Albi	64	5	33-40	9	outbound	no
Albi	64	6	41-47	8.9	outbound	no
Albi	64	7	48-54	9.8	outbound	no
Albi	64	8	55-62	9	outbound	no
Albi	64	9	63-71	7.6	turning	no
Albi	64	10	72-80	9.3	inbound	no
Albi	65	1	1-23	7.7	outbound	no
Albi	65	2	24-40	10.1	outbound	no
Albi	65	3	41-55	9.7	outbound	no
Albi	65	4	56-73	8.3	turning	no
Albi	65	5	74-88	10.4	inbound	no
Albi	65	6	89-105	10.2	inbound	no
Albi	65	7	106-122	9.7	inbound	no
Albi	65	8	123-139	8.7	inbound	no
Albi	65	9	140-156	9.4	inbound	no
Albi	65	10	157-167	17.8	inbound	no
Albi	66	1	1-22	8.7	outbound	no
Albi	66	2	23-38	10.5	outbound	no
Albi	66	3	39-45	8.9	outbound	no
Albi	66	4	46-51	6.6	outbound	no
Albi	66	5	52-70	7.5	outbound	no
Albi	66	6	71-83	13.4	outbound	no
Albi	66	7	84-97	9.9	outbound	no
Albi	66	8	98-107	6	turning	no
Albi	66	9	108-126	8	inbound	no
Albi	66	10	127-144	10.1	inbound	no
Albi	67	1	1-21	6.8	outbound	no
Albi	67	2	22-42	6.5	outbound	no
Albi	67	3	43-59	8.5	outbound	no
Albi	67	4	60-74	8.1	outbound	no
Albi	67	5	75-95	5.9	outbound	no
Albi	67	6	96-111	8.3	outbound	no
Albi	67	7	112-124	6.6	turning	no
Albi	67	8	125-135	6.8	inbound	no
Albi	67	9	136-148	6.9	inbound	no
Albi	67	10	149-165	8.5	inbound	no
Albi	69	1	1-17	10.4	outbound	no
Albi	69	2	18-33	10.3	outbound	no
Albi	69	3	34-48	11.2	outbound	no
Albi	69	4	49-66	9.3	outbound	no
Albi	69	5	67-84	9.6	outbound	no
Albi	69	6	85-104	8.7	outbound	no
Albi	69	7	105-125	8.1	turning	no
Albi	69	8	126-142	10.2	inbound	no
Albi	69	9	143-158	10.8	inbound	no
Albi	69	10	159-169	17.8	inbound	no
Albi	70	1	1-11	7.4	outbound	no
Albi	70	2	12-28	5.3	outbound	no
Albi	70	3	29-36	10.4	outbound	no
Albi	70	4	37-46	8	outbound	no
Albi	70	5	47-56	8.1	outbound	no
Albi	70	6	57-66	8.7	outbound	no
Albi	70	7	67-80	6.3	turning	no
Albi	70	8	81-93	6.8	inbound	no
Albi	70	9	94-106	6.6	inbound	no
Albi	70	10	107-112	13.3	inbound	no
Albi	71	1	1-18	10.3	outbound	no
Albi	71	2	19-37	9.9	outbound	no
Albi	71	3	38-53	8.1	outbound	no
Albi	71	4	54-74	8.4	outbound	no
Albi	71	5	75-104	6.2	outbound	no
Albi	71	6	105-139	5	outbound	no
Albi	71	7	140-161	8.3	outbound	no
Albi	71	8	162-172	11	outbound	no
Albi	71	9	173-195	7.1	turning	no
Albi	71	10	196-215	9.9	inbound	no
Albi	72	1	1-98	3.14	outbound	no
Albi	72	2	99-191	3.35	outbound	no
Albi	72	3	192-277	3.6	outbound	no
Albi	72	4	278-317	7.7	outbound	no
Albi	72	5	318-364	6.4	outbound	no
Albi	72	6	365-406	7.4	turning	no
Albi	72	7	407-426	15.9	inbound	no
Albi	72	8	427-450	12.6	inbound	no
Albi	72	9	451-513	3.36	inbound	no
Albi	72	10	514-574	4	inbound	no
Albi	73	1	1-8	8.6	outbound	no
Albi	73	2	9-14	12.6	outbound	no
Albi	73	3	15-21	10.2	outbound	no
Albi	73	4	22-28	8.2	outbound	no
Albi	73	5	29-40	5.2	outbound	no
Albi	73	6	41-46	12	outbound	no
Albi	73	7	47-54	8.7	outbound	no
Albi	73	8	55-61	8.2	turning	no
Albi	73	9	62-65	16.6	inbound	no
Albi	73	10	66-71	16.2	inbound	no
Albi	74	1	1-5	3.9	outbound	no
Albi	74	2	6-7	10.8	outbound	no
Albi	74	3	8-9	10.4	outbound	no
Albi	74	4	10-12	7.1	turning	no
Albi	74	5	13-15	7.7	inbound	no
Albi	74	6	16-18	8	inbound	no
Albi	74	7	19-20	12.3	inbound	no
Albi	74	8	21-22	11	inbound	no
Albi	74	9	23-25	6.2	inbound	no
Albi	74	10	26-29	9.1	inbound	no
Albi	78	1	1-11	4.4	outbound	no
Albi	78	2	12-17	8.9	outbound	no
Albi	78	3	18-22	9.9	outbound	no
Albi	78	4	23-27	10.1	outbound	no
Albi	78	5	28-32	10	outbound	no
Albi	78	6	33-43	4.9	turning	no
Albi	78	7	44-50	7.4	inbound	no
Albi	78	8	51-57	6.8	inbound	no
Albi	78	9	58-63	8.4	inbound	no
Albi	78	10	64-72	6	inbound	no
Albi	81	1	1-19	5.9	outbound	no
Albi	81	2	20-34	6.9	outbound	no
Albi	81	3	35-48	8.1	outbound	no
Albi	81	4	49-60	8.4	outbound	no
Albi	81	5	61-71	10.4	outbound	no
Albi	81	6	72-84	6.9	turning	no
Albi	81	7	85-99	7	inbound	no
Albi	81	8	100-116	6.9	inbound	no
Albi	81	9	117-132	6.8	inbound	no
Albi	81	10	133-153	5.4	inbound	no
Albi	83	1	1-11	7.3	outbound	no
Albi	83	2	12-31	4.2	outbound	no
Albi	83	3	32-39	10	outbound	no
Albi	83	4	40-47	7	outbound	no
Albi	83	5	48-57	7.6	outbound	no
Albi	83	6	58-61	5.5	turning	no
Albi	83	7	62-69	6.6	inbound	no
Albi	83	8	70-75	9.5	inbound	no
Albi	83	9	76-82	10.6	inbound	no
Albi	83	10	83-89	12.6	inbound	no
Albi	84	1	1-7	7	outbound	no
Albi	84	2	8-13	7.5	outbound	no
Albi	84	3	14-22	4.7	outbound	no
Albi	84	4	23-29	6.5	outbound	no
Albi	84	5	30-37	5	outbound	no
Albi	84	6	38-48	4.1	turning	no
Albi	84	7	49-54	6.9	inbound	no
Albi	84	8	55-60	7.4	inbound	no
Albi	84	9	61-69	4.6	inbound	no
Albi	84	10	70-73	13.9	inbound	no
Albi	86	1	1-5	6.5	outbound	no
Albi	86	2	6-10	6.3	outbound	no
Albi	86	3	11-15	5.6	outbound	no
Albi	86	4	16-22	4.8	outbound	no
Albi	86	5	23-28	5.5	turning	yes
Albi	86	6	29-32	7.2	inbound	no
Albi	86	7	33-40	4.1	inbound	no
Albi	86	8	41-46	5.3	inbound	no
Albi	86	9	47-54	3.9	inbound	no
Albi	86	10	55-63	4.5	inbound	no
Albi	88	1	1-43	10	outbound	no
Albi	88	2	44-73	7.9	outbound	no
Albi	88	3	74-108	7.8	outbound	no
Albi	88	4	109-143	11.4	outbound	no
Albi	88	5	144-193	8	outbound	no
Albi	88	6	194-247	8	outbound	no
Albi	88	7	248-301	7.1	outbound	no
Albi	88	8	302-369	5	turning	no
Albi	88	9	370-424	5.1	inbound	no
Albi	88	10	425-483	7.1	inbound	no
Albi	91	1	1-9	5.6	outbound	no
Albi	91	2	10-19	5.2	outbound	no
Albi	91	3	20-25	7.8	outbound	no
Albi	91	4	26-31	9.6	outbound	no
Albi	91	5	32-35	12.6	outbound	no
Albi	91	6	36-42	6.6	turning	no
Albi	91	7	43-48	8.3	inbound	no
Albi	91	8	49-52	11.3	inbound	no
Albi	91	9	53-58	8.4	inbound	no
Albi	91	10	59-62	16	inbound	no
Albi	92	1	1-9	7.1	outbound	no
Albi	92	2	10-21	5.3	outbound	no
Albi	92	3	22-36	4.4	outbound	no
Albi	92	4	37-46	5.7	outbound	no
Albi	92	5	47-55	6.6	outbound	no
Albi	92	6	56-69	4.8	outbound	no
Albi	92	7	70-86	3.9	outbound	no
Albi	92	8	87-109	2.95	turning	no
Albi	92	9	110-125	4.5	inbound	no
Albi	92	10	126-131	12.6	inbound	no
Albi	97	1	1-15	7.7	outbound	no
Albi	97	2	16-31	7.3	outbound	no
Albi	97	3	32-45	8	outbound	no
Albi	97	4	46-63	6.6	outbound	no
Albi	97	5	64-78	7.3	outbound	no
Albi	97	6	79-94	7.4	turning	yes
Albi	97	7	95-103	12	inbound	no
Albi	97	8	104-117	8.4	inbound	no
Albi	97	9	118-131	8.4	inbound	no
Albi	97	10	132-154	4.8	inbound	no
Albi	98	1	1-29	6.2	outbound	no
Albi	98	2	30-54	7.1	outbound	no
Albi	98	3	55-91	4.9	outbound	no
Albi	98	4	92-107	11.1	outbound	no
Albi	98	5	108-131	7.5	outbound	no
Albi	98	6	132-157	6.7	outbound	no
Albi	98	7	158-200	4.1	turning	no
Albi	98	8	201-222	7.6	inbound	no
Albi	98	9	223-247	7.2	inbound	no
Albi	98	10	248-268	9.3	inbound	no
Albi	100	1	1-31	4.9	outbound	no
Albi	100	2	32-53	6.4	outbound	no
Albi	100	3	54-77	6.2	outbound	no
Albi	100	4	78-90	12.7	outbound	no
Albi	100	5	91-114	6	outbound	no
Albi	100	6	115-138	6.3	outbound	no
Albi	100	7	139-166	5.8	turning	no
Albi	100	8	167-187	7.3	inbound	no
Albi	100	9	188-210	7	inbound	no
Albi	100	10	211-228	8.7	inbound	no
Albi	101	1	1-13	6.3	outbound	no
Albi	101	2	14-26	8.4	outbound	no
Albi	101	3	27-49	4.2	outbound	no
Albi	101	4	50-59	8.7	outbound	no
Albi	101	5	60-72	7.5	outbound	no
Albi	101	6	73-79	10.6	outbound	no
Albi	101	7	80-94	7.2	turning	no
Albi	101	8	95-108	7.4	inbound	no
Albi	101	9	109-118	10.6	inbound	no
Albi	101	10	119-130	8.8	inbound	no
Albi	103	1	1-8	6.9	outbound	no
Albi	103	2	9-14	10.4	outbound	no
Albi	103	3	15-21	8.5	outbound	no
Albi	103	4	22-30	5.5	outbound	no
Albi	103	5	31-41	4.7	turning	no
Albi	103	6	42-47	8.1	inbound	no
Albi	103	7	48-55	7	inbound	no
Albi	103	8	56-62	7.7	inbound	no
Albi	103	9	63-68	9.6	inbound	no
Albi	103	10	69-78	5.2	inbound	no
Albi	104	1	1-13	3.8	outbound	no
Albi	104	2	14-22	4.9	outbound	no
Albi	104	3	23-30	5.8	outbound	no
Albi	104	4	31-43	3.7	outbound	no
Albi	104	5	44-55	3.6	turning	no
Albi	104	6	56-62	7.2	inbound	no
Albi	104	7	63-65	9.3	inbound	no
Albi	104	8	66-69	10.5	inbound	no
Albi	104	9	70-75	8	inbound	no
Albi	104	10	76-81	9.6	inbound	no
Albi	105	1	1-16	3.7	outbound	no
Albi	105	2	17-27	5.3	outbound	no
Albi	105	3	28-39	4.9	outbound	no
Albi	105	4	40-50	4	outbound	no
Albi	105	5	51-67	3.2	outbound	no
Albi	105	6	68-83	3.32	turning	no
Albi	105	7	84-96	3.9	inbound	no
Albi	105	8	97-106	5.8	inbound	no
Albi	105	9	107-114	7.4	inbound	no
Albi	105	10	115-123	7.6	inbound	no
Albi	107	1	1-6	9	outbound	no
Albi	107	2	7-11	10.6	outbound	no
Albi	107	3	12-17	9.8	outbound	no
Albi	107	4	18-23	8.7	outbound	no
Albi	107	5	24-31	4.6	turning	no
Albi	107	6	32-38	6.3	inbound	no
Albi	107	7	39-44	8.7	inbound	no
Albi	107	8	45-50	8.4	inbound	no
Albi	107	9	51-53	14.6	inbound	no
Albi	107	10	54-59	11.7	inbound	no
Albi	108	1	1-5	7.2	outbound	no
Albi	108	2	6-11	6.3	outbound	no
Albi	108	3	12-15	8.9	outbound	no
Albi	108	4	16-17	7.7	outbound	no
Albi	108	5	18-19	12.4	outbound	no
Albi	108	6	20-25	6.8	outbound	no
Albi	108	7	26-29	6.2	turning	no
Albi	108	8	30-32	11.3	inbound	no
Albi	108	9	33-37	8.9	inbound	no
Albi	108	10	38-42	10.8	inbound	no
Albi	109	1	1-4	10.4	outbound	no
Albi	109	2	5-9	7.5	outbound	no
Albi	109	3	10-11	7.7	outbound	no
Albi	109	4	12-14	8.1	outbound	no
Albi	109	5	15-19	8.3	outbound	no
Albi	109	6	20-25	6.6	outbound	no
Albi	109	7	26-29	9	outbound	no
Albi	109	8	30-34	5.6	turning	no
Albi	109	9	35-38	10.8	inbound	no
Albi	109	10	39-45	6.3	inbound	no
Albi	110	1	1-4	7.2	outbound	no
Albi	110	2	5-11	5.3	outbound	no
Albi	110	3	12-19	4.5	outbound	no
Albi	110	4	20-28	3.8	outbound	no
Albi	110	5	29-35	6.2	outbound	no
Albi	110	6	36-41	5.2	outbound	no
Albi	110	7	42-48	5.5	outbound	no
Albi	110	8	49-56	4.8	turning	no
Albi	110	9	57-62	6.8	inbound	no
Albi	110	10	63-68	7.7	inbound	no
Albi	111	1	1-25	12	outbound	no
Albi	111	2	26-51	11.4	outbound	no
Albi	111	3	52-86	8.3	outbound	no
Albi	111	4	87-121	8.3	outbound	no
Albi	111	5	122-159	7.8	outbound	no
Albi	111	6	160-188	10.1	turning	yes
Albi	111	7	189-224	8.2	inbound	no
Albi	111	8	225-263	7.5	inbound	no
Albi	111	9	264-291	10.6	inbound	no
Albi	111	10	292-327	8.6	inbound	no
Albi	114	1	1-9	6.3	outbound	no
Albi	114	2	10-16	7.9	outbound	no
Albi	114	3	17-24	7.7	outbound	no
Albi	114	4	25-31	7.2	outbound	no
Albi	114	5	32-40	5.7	turning	no
Albi	114	6	41-46	9.8	inbound	no
Albi	114	7	47-52	10	inbound	no
Albi	114	8	53-56	14.1	inbound	no
Albi	114	9	57-63	8.6	inbound	no
Albi	114	10	64-72	7.4	inbound	no
Albi	118	1	1-3	16.9	outbound	no
Albi	118	2	4-6	15.4	outbound	no
Albi	118	3	7-10	10.8	outbound	no
Albi	118	4	11-15	12.2	outbound	no
Albi	118	5	16-23	7.7	outbound	no
Albi	118	6	24-28	10.8	turning	no
Albi	118	7	29-32	14.9	inbound	no
Albi	118	8	33-38	8.4	inbound	no
Albi	118	9	39-44	8.8	inbound	no
Albi	118	10	45-50	11.7	inbound	no
Albi	119	1	1-26	6.7	outbound	no
Albi	119	2	27-53	6.5	outbound	no
Albi	119	3	54-73	9.1	outbound	no
Albi	119	4	74-94	8.4	outbound	no
Albi	119	5	95-115	8.1	outbound	no
Albi	119	6	116-132	10.3	outbound	no
Albi	119	7	133-148	11.2	turning	yes
Albi	119	8	149-165	10.9	inbound	no
Albi	119	9	166-180	12.2	inbound	no
Albi	119	10	181-199	9.4	inbound	no
Albi	124	1	1-23	7.5	outbound	no
Albi	124	2	24-47	7.2	outbound	no
Albi	124	3	48-75	6	outbound	no
Albi	124	4	76-100	6.7	outbound	no
Albi	124	5	101-121	7	turning	no
Albi	124	6	122-141	8.9	inbound	no
Albi	124	7	142-151	8.9	inbound	no
Albi	124	8	152-171	8.2	inbound	no
Albi	124	9	172-192	7.5	inbound	no
Albi	124	10	193-213	8.8	inbound	no
Albi	128	1	1-36	6.8	outbound	no
Albi	128	2	37-69	6.9	outbound	no
Albi	128	3	70-97	8.8	outbound	no
Albi	128	4	98-125	9	outbound	no
Albi	128	5	126-150	9.9	outbound	no
Albi	128	6	151-185	6.6	turning	no
Albi	128	7	186-219	7.3	inbound	no
Albi	128	8	220-250	8	inbound	no
Albi	128	9	251-279	8.3	inbound	no
Albi	128	10	280-308	8.5	inbound	no
Albi	129	1	1-12	4.4	outbound	no
Albi	129	2	13-19	7.4	outbound	no
Albi	129	3	20-25	9.7	outbound	no
Albi	129	4	26-32	7.6	outbound	no
Albi	129	5	33-37	10.6	outbound	no
Albi	129	6	38-44	6.5	turning	no
Albi	129	7	45-52	6.9	inbound	no
Albi	129	8	53-59	7.5	inbound	no
Albi	129	9	60-70	4.7	inbound	no
Albi	129	10	71-78	8.3	inbound	no
Amalka	2	1	1-7	8.2	outbound	no
Amalka	2	2	8-20	4.3	outbound	no
Amalka	2	3	21-27	8.1	outbound	no
Amalka	2	4	28-37	5.8	outbound	no
Amalka	2	5	38-47	6.3	outbound	no
Amalka	2	6	48-56	5.9	turning	no
Amalka	2	7	57-63	7.1	inbound	no
Amalka	2	8	64-67	14.6	inbound	no
Amalka	2	9	68-75	8.4	inbound	no
Amalka	2	10	76-84	7.3	inbound	no
Amalka	3	1	1-4	6.7	outbound	no
Amalka	3	2	5-9	6	outbound	no
Amalka	3	3	10-13	8.4	outbound	no
Amalka	3	4	14-17	7.8	outbound	no
Amalka	3	5	18-21	7.7	outbound	no
Amalka	3	6	22-30	3.08	turning	no
Amalka	3	7	31-34	6.7	inbound	no
Amalka	3	8	35-40	4.5	inbound	no
Amalka	3	9	41-43	9.3	inbound	no
Amalka	3	10	44-48	9.2	inbound	no
Amalka	4	1	1-2	18.2	outbound	no
Amalka	4	2	3-4	18.5	outbound	no
Amalka	4	3	5-6	18.4	outbound	no
Amalka	4	4	7-8	13.3	outbound	no
Amalka	4	5	9-10	11.3	outbound	no
Amalka	4	6	11-12	10.1	turning	no
Amalka	4	7	13-14	13.9	inbound	no
Amalka	4	8	15-16	14.4	inbound	no
Amalka	4	9	17-20	5.6	inbound	no
Amalka	4	10	21-23	17	inbound	no
Amalka	5	1	1-4	17.8	outbound	no
Amalka	5	2	5-11	10.7	outbound	no
Amalka	5	3	12-18	11.1	outbound	no
Amalka	5	4	19-23	15	outbound	no
Amalka	5	5	24-30	11.2	outbound	no
Amalka	5	6	31-37	10.8	outbound	no
Amalka	5	7	38-58	3.59	turning	no
Amalka	5	8	59-78	4.2	inbound	no
Amalka	5	9	79-85	10.9	inbound	no
Amalka	5	10	86-96	7.4	inbound	no
Amalka	7	1	1-7	6.6	outbound	no
Amalka	7	2	8-16	4.9	outbound	no
Amalka	7	3	17-24	5.6	outbound	no
Amalka	7	4	25-30	7.1	outbound	no
Amalka	7	5	31-34	10.7	outbound	no
Amalka	7	6	35-40	8	turning	no
Amalka	7	7	41-44	12.7	inbound	no
Amalka	7	8	45-49	9.3	inbound	no
Amalka	7	9	50-55	7.4	inbound	no
Amalka	7	10	56-60	10.5	inbound	no
Amalka	8	1	1-13	6.4	outbound	no
Amalka	8	2	14-27	5.9	outbound	no
Amalka	8	3	28-37	5.9	outbound	no
Amalka	8	4	38-47	7.2	outbound	no
Amalka	8	5	48-55	9.9	outbound	no
Amalka	8	6	56-67	6.6	turning	no
Amalka	8	7	68-78	7.4	inbound	no
Amalka	8	8	79-88	8.4	inbound	no
Amalka	8	9	89-103	5.8	inbound	no
Amalka	8	10	104-125	3.9	inbound	no
Amalka	9	1	1-2	12.3	outbound	no
Amalka	9	2	3-5	8.3	outbound	no
Amalka	9	3	6-9	5.2	outbound	no
Amalka	9	4	10-13	5.2	outbound	no
Amalka	9	5	14-15	8.9	outbound	no
Amalka	9	6	16-18	9.1	outbound	no
Amalka	9	7	19-21	6	turning	no
Amalka	9	8	22-24	9.1	inbound	no
Amalka	9	9	25-27	7.8	inbound	no
Amalka	9	10	28-31	9.9	inbound	no
Amalka	10	1	1-20	4.3	outbound	no
Amalka	10	2	21-44	3.53	outbound	no
Amalka	10	3	45-57	5.8	outbound	no
Amalka	10	4	58-74	4.9	outbound	no
Amalka	10	5	75-88	5.4	outbound	no
Amalka	10	6	89-98	8.7	outbound	no
Amalka	10	7	99-111	6.6	outbound	no
Amalka	10	8	112-130	4.7	turning	no
Amalka	10	9	131-146	5.5	inbound	no
Amalka	10	10	147-157	7.5	inbound	no
Amalka	13	1	1-3	7.4	outbound	no
Amalka	13	2	4-6	8.6	outbound	no
Amalka	13	3	7-9	5.7	outbound	no
Amalka	13	4	10-11	7.9	outbound	no
Amalka	13	5	12-14	6.9	turning	no
Amalka	13	6	15-16	10	inbound	no
Amalka	13	7	17-18	9.6	inbound	no
Amalka	13	8	19-20	9.9	inbound	no
Amalka	13	9	21-23	6.4	inbound	no
Amalka	13	10	24-27	8.1	inbound	no
Amalka	16	1	1-6	8.3	outbound	no
Amalka	16	2	7-12	8.4	outbound	no
Amalka	16	3	13-19	7.2	outbound	no
Amalka	16	4	20-28	5.5	outbound	no
Amalka	16	5	29-33	10	outbound	no
Amalka	16	6	34-42	5.8	outbound	no
Amalka	16	7	43-53	4.5	turning	no
Amalka	16	8	54-63	4.9	inbound	no
Amalka	16	9	64-73	4.9	inbound	no
Amalka	16	10	74-85	4.9	inbound	no
Amalka	20	1	1-3	10.4	outbound	no
Amalka	20	2	4-5	11.7	outbound	no
Amalka	20	3	6-7	12.8	outbound	no
Amalka	20	4	8-12	4.6	outbound	no
Amalka	20	5	13-14	13.8	outbound	no
Amalka	20	6	15-17	10.5	turning	no
Amalka	20	7	18-19	12.6	inbound	no
Amalka	20	8	20-21	12.5	inbound	no
Amalka	20	9	22-24	9	inbound	no
Amalka	20	10	25-28	9.7	inbound	no
Amalka	21	1	1-8	6.2	outbound	no
Amalka	21	2	9-15	6.9	outbound	no
Amalka	21	3	16-22	7.8	outbound	no
Amalka	21	4	23-28	7.9	outbound	no
Amalka	21	5	29-35	7.4	outbound	no
Amalka	21	6	36-43	6.6	outbound	no
Amalka	21	7	44-52	6.2	turning	no
Amalka	21	8	53-57	9.2	inbound	no
Amalka	21	9	58-61	10.4	inbound	no
Amalka	21	10	62-72	6	inbound	no
Amalka	22	1	1-8	4.2	outbound	no
Amalka	22	2	9-12	9.2	outbound	no
Amalka	22	3	13-20	4.6	outbound	no
Amalka	22	4	21-25	7.4	outbound	no
Amalka	22	5	26-30	8.3	outbound	no
Amalka	22	6	31-38	4.8	turning	no
Amalka	22	7	39-44	6.4	inbound	no
Amalka	22	8	45-49	6.9	inbound	no
Amalka	22	9	50-56	5.7	inbound	no
Amalka	22	10	57-62	7.3	inbound	no
Amalka	23	1	1-8	13.1	outbound	no
Amalka	23	2	9-19	9.5	outbound	no
Amalka	23	3	20-30	9.8	outbound	no
Amalka	23	4	31-39	11.4	outbound	no
Amalka	23	5	40-59	5.3	outbound	no
Amalka	23	6	60-73	6.6	outbound	no
Amalka	23	7	74-86	7.5	turning	no
Amalka	23	8	87-98	9	inbound	no
Amalka	23	9	99-106	12.6	inbound	no
Amalka	23	10	107-113	15	inbound	no
Amalka	24	1	1-21	10.2	outbound	no
Amalka	24	2	22-45	8.4	outbound	no
Amalka	24	3	46-64	9.6	outbound	no
Amalka	24	4	65-93	7.7	outbound	no
Amalka	24	5	94-127	6.4	turning	no
Amalka	24	6	128-157	7.4	inbound	no
Amalka	24	7	158-188	7.4	inbound	no
Amalka	24	8	189-241	4.2	inbound	no
Amalka	24	9	242-297	4	inbound	no
Amalka	24	10	298-341	5.3	inbound	no
Amalka	25	1	1-13	5.9	outbound	no
Amalka	25	2	14-22	8.6	outbound	no
Amalka	25	3	23-33	6.8	outbound	no
Amalka	25	4	34-47	5.4	turning	no
Amalka	25	5	48-60	6.3	inbound	no
Amalka	25	6	61-76	4.8	inbound	no
Amalka	25	7	77-85	7.9	inbound	no
Amalka	25	8	86-98	6.3	inbound	no
Amalka	25	9	99-109	7	inbound	no
Amalka	25	10	110-120	7	inbound	no
Amalka	26	1	1-9	16.2	outbound	no
Amalka	26	2	10-22	10.5	outbound	no
Amalka	26	3	23-38	8.7	outbound	no
Amalka	26	4	39-61	6.3	outbound	no
Amalka	26	5	62-83	5.2	outbound	no
Amalka	26	6	84-116	4.1	turning	no
Amalka	26	7	117-147	4.5	inbound	no
Amalka	26	8	148-167	6.8	inbound	no
Amalka	26	9	168-196	4.4	inbound	no
Amalka	26	10	197-222	6.1	inbound	no
Amalka	27	1	1-11	5.1	outbound	no
Amalka	27	2	12-24	4.7	outbound	no
Amalka	27	3	25-31	7.5	outbound	no
Amalka	27	4	32-39	7.2	outbound	no
Amalka	27	5	40-48	6.6	outbound	no
Amalka	27	6	49-60	4.9	turning	no
Amalka	27	7	61-69	6.2	inbound	no
Amalka	27	8	70-77	7.4	inbound	no
Amalka	27	9	78-86	7.2	inbound	no
Amalka	27	10	87-92	9	inbound	no
Amalka	28	1	1-5	7.1	outbound	no
Amalka	28	2	6-9	11.5	outbound	no
Amalka	28	3	10-14	8.5	outbound	no
Amalka	28	4	15-22	5	outbound	no
Amalka	28	5	23-31	4.6	outbound	no
Amalka	28	6	32-40	4.5	turning	no
Amalka	28	7	41-45	7.4	inbound	no
Amalka	28	8	46-52	5.8	inbound	no
Amalka	28	9	53-56	10.7	inbound	no
Amalka	28	10	57-62	8.2	inbound	no
Amalka	29	1	1-18	6.5	outbound	no
Amalka	29	2	19-31	9.3	outbound	no
Amalka	29	3	32-43	10.1	outbound	no
Amalka	29	4	44-57	6.9	outbound	no
Amalka	29	5	58-67	9.2	outbound	no
Amalka	29	6	68-105	3.03	turning	no
Amalka	29	7	106-121	6.4	inbound	no
Amalka	29	8	122-140	5.5	inbound	no
Amalka	29	9	141-162	5.5	inbound	no
Amalka	29	10	163-185	5.5	inbound	no
Amalka	31	1	1-10	5.2	outbound	no
Amalka	31	2	11-23	3.9	outbound	no
Amalka	31	3	24-37	3.7	outbound	no
Amalka	31	4	38-46	6.2	outbound	no
Amalka	31	5	47-55	5.9	outbound	no
Amalka	31	6	56-64	5	turning	no
Amalka	31	7	65-71	7.4	inbound	no
Amalka	31	8	72-80	5.8	inbound	no
Amalka	31	9	81-90	4.9	inbound	no
Amalka	31	10	91-100	6.5	inbound	no
Amalka	32	1	1-8	7.5	outbound	no
Amalka	32	2	9-14	11.6	outbound	no
Amalka	32	3	15-19	12	outbound	no
Amalka	32	4	20-26	9.1	outbound	no
Amalka	32	5	27-38	4.8	turning	no
Amalka	32	6	39-51	5	inbound	no
Amalka	32	7	52-60	6.5	inbound	no
Amalka	32	8	61-72	5.2	inbound	no
Amalka	32	9	73-81	7.9	inbound	no
Amalka	32	10	82-93	5.7	inbound	no
Amalka	33	1	1-10	8.1	outbound	no
Amalka	33	2	11-25	5.3	outbound	no
Amalka	33	3	26-43	4.7	outbound	no
Amalka	33	4	44-54	7.6	outbound	no
Amalka	33	5	55-66	6.8	outbound	no
Amalka	33	6	67-84	5	turning	yes
Amalka	33	7	85-102	4.5	inbound	no
Amalka	33	8	103-117	5	inbound	no
Amalka	33	9	118-135	4.8	inbound	no
Amalka	33	10	136-142	12.2	inbound	no
Amalka	34	1	1-8	6.9	outbound	no
Amalka	34	2	9-21	4	outbound	no
Amalka	34	3	22-32	4.1	outbound	no
Amalka	34	4	33-41	6.3	outbound	no
Amalka	34	5	42-50	6	turning	no
Amalka	34	6	51-55	11.3	inbound	no
Amalka	34	7	56-59	13.9	inbound	no
Amalka	34	8	60-65	8.7	inbound	no
Amalka	34	9	66-71	9.2	inbound	no
Amalka	34	10	72-78	6.5	inbound	no
Amalka	35	1	1-11	5.1	outbound	no
Amalka	35	2	12-19	8	outbound	no
Amalka	35	3	20-29	5.8	outbound	no
Amalka	35	4	30-38	6.2	outbound	no
Amalka	35	5	39-48	6.3	outbound	no
Amalka	35	6	49-57	5.5	turning	no
Amalka	35	7	58-65	5.9	inbound	no
Amalka	35	8	66-71	8.6	inbound	no
Amalka	35	9	72-78	9	inbound	no
Amalka	35	10	79-84	7.8	inbound	no
Figy	1	1	1-14	10.9	outbound	no
Figy	1	2	15-28	9.9	outbound	no
Figy	1	3	29-47	6.5	outbound	no
Figy	1	4	48-69	5.7	outbound	no
Figy	1	5	70-78	5.5	outbound	no
Figy	1	6	79-110	3.9	outbound	no
Figy	1	7	111-149	4	turning	yes
Figy	1	8	150-176	5.9	inbound	no
Figy	1	9	177-195	8	inbound	no
Figy	1	10	196-215	9.6	inbound	no
Figy	2	1	1-3	5.9	outbound	no
Figy	2	2	4-6	6.4	outbound	no
Figy	2	3	7-11	4.3	outbound	no
Figy	2	4	12-21	2.22	outbound	no
Figy	2	5	22-23	8	outbound	no
Figy	2	6	24-26	8	turning	no
Figy	2	7	27-28	13.3	inbound	no
Figy	2	8	29-30	9.4	inbound	no
Figy	2	9	31-33	4.7	inbound	no
Figy	2	10	34-36	8.3	inbound	no
Figy	3	1	1-5	7	outbound	no
Figy	3	2	6-11	5.7	outbound	no
Figy	3	3	12-23	2.61	outbound	no
Figy	3	4	24-29	6.2	outbound	no
Figy	3	5	30-37	4.3	turning	no
Figy	3	6	38-42	6.7	inbound	no
Figy	3	7	43-46	8.4	inbound	no
Figy	3	8	47-55	4.3	inbound	no
Figy	3	9	56-59	8.6	inbound	no
Figy	3	10	60-64	6.3	inbound	no
Figy	4	1	1-4	8	outbound	no
Figy	4	2	5-9	7.1	outbound	no
Figy	4	3	10-14	7.9	outbound	no
Figy	4	4	15-19	7.8	outbound	no
Figy	4	5	20-24	6.7	outbound	no
Figy	4	6	25-33	4.3	turning	no
Figy	4	7	34-42	4.5	inbound	no
Figy	4	8	43-49	4.9	inbound	no
Figy	4	9	50-53	8.3	inbound	no
Figy	4	10	54-60	5.5	inbound	no
Figy	8	1	1-13	3.7	outbound	no
Figy	8	2	14-26	3.51	outbound	no
Figy	8	3	27-39	3.54	outbound	no
Figy	8	4	40-51	3.8	outbound	no
Figy	8	5	52-66	3.15	turning	no
Figy	8	6	67-79	3.36	inbound	no
Figy	8	7	80-89	4.7	inbound	no
Figy	8	8	90-96	5.8	inbound	no
Figy	8	9	97-101	9.7	inbound	no
Figy	8	10	102-109	5.9	inbound	no
Figy	9	1	1-17	4.5	outbound	no
Figy	9	2	18-27	8	outbound	no
Figy	9	3	28-39	7	outbound	no
Figy	9	4	40-55	4.4	outbound	no
Figy	9	5	56-68	5.4	outbound	no
Figy	9	6	69-84	2.72	turning	no
Figy	9	7	85-92	5.1	inbound	no
Figy	9	8	93-104	4.8	inbound	no
Figy	9	9	105-113	8.7	inbound	no
Figy	9	10	114-127	5.6	inbound	no
Figy	10	1	1-9	5.2	outbound	no
Figy	10	2	10-18	4.6	outbound	no
Figy	10	3	19-25	4.9	outbound	no
Figy	10	4	26-28	5.5	outbound	no
Figy	10	5	29-31	7.5	outbound	no
Figy	10	6	32-37	7.5	outbound	no
Figy	10	7	38-44	6.1	turning	no
Figy	10	8	45-47	12.8	inbound	no
Figy	10	9	48-52	7.2	inbound	no
Figy	10	10	53-60	5.5	inbound	no
Figy	11	1	1-4	7	outbound	no
Figy	11	2	5-7	10.5	outbound	no
Figy	11	3	8-11	7.4	outbound	no
Figy	11	4	12-15	8.4	outbound	no
Figy	11	5	16-20	6.2	outbound	no
Figy	11	6	21-26	4.6	turning	no
Figy	11	7	27-30	7.7	inbound	no
Figy	11	8	31-33	10.4	inbound	no
Figy	11	9	34-36	10.8	inbound	no
Figy	11	10	37-39	12.9	inbound	no
Figy	12	1	1-3	13.8	outbound	no
Figy	12	2	4-5	14.4	outbound	no
Figy	12	3	6-8	11.6	outbound	no
Figy	12	4	9-10	14.9	outbound	no
Figy	12	5	11-12	13.2	outbound	no
Figy	12	6	13-14	14.5	outbound	no
Figy	12	7	15-18	9	turning	no
Figy	12	8	19-21	12.5	inbound	no
Figy	12	9	22-23	14.8	inbound	no
Figy	12	10	24-27	12.6	inbound	no
Figy	15	1	1-4	5.7	outbound	no
Figy	15	2	5-7	7	outbound	no
Figy	15	3	8-10	7.3	outbound	no
Figy	15	4	11-13	7.7	outbound	no
Figy	15	5	14-18	3.44	turning	no
Figy	15	6	19-20	10.1	inbound	no
Figy	15	7	21-22	9	inbound	no
Figy	15	8	23-24	12.7	inbound	no
Figy	15	9	25-26	10.5	inbound	no
Figy	15	10	27-30	9.6	inbound	no
Figy	16	1	1-8	5.8	outbound	no
Figy	16	2	9-15	6.2	outbound	no
Figy	16	3	16-21	7.8	outbound	no
Figy	16	4	22-27	7.1	outbound	no
Figy	16	5	28-40	3.33	turning	no
Figy	16	6	41-49	4.5	inbound	no
Figy	16	7	50-53	10.6	inbound	no
Figy	16	8	54-59	7.3	inbound	no
Figy	16	9	60-70	3.9	inbound	no
Figy	16	10	71-80	4.5	inbound	no
Figy	17	1	1-11	3.7	outbound	no
Figy	17	2	12-23	3.21	outbound	no
Figy	17	3	24-29	6.6	outbound	no
Figy	17	4	30-39	3.8	outbound	no
Figy	17	5	40-45	7.1	outbound	no
Figy	17	6	46-52	5	turning	no
Figy	17	7	53-59	5.8	inbound	no
Figy	17	8	60-65	6.4	inbound	no
Figy	17	9	66-72	5.5	inbound	no
Figy	17	10	73-81	5.3	inbound	no
Figy	18	1	1-10	5.7	outbound	no
Figy	18	2	11-19	7.3	outbound	no
Figy	18	3	20-31	5	outbound	no
Figy	18	4	32-39	7.9	outbound	no
Figy	18	5	40-47	7.9	outbound	no
Figy	18	6	48-56	6.1	turning	no
Figy	18	7	57-64	6.9	inbound	no
Figy	18	8	65-73	6	inbound	no
Figy	18	9	74-83	5.3	inbound	no
Figy	18	10	84-89	11.8	inbound	no
Figy	20	1	1-26	5.7	outbound	no
Figy	20	2	27-45	7.8	outbound	no
Figy	20	3	46-62	7.8	outbound	no
Figy	20	4	63-103	3.7	outbound	no
Figy	20	5	104-139	4.1	turning	no
Figy	20	6	140-171	4.6	inbound	no
Figy	20	7	172-201	4.9	inbound	no
Figy	20	8	202-224	5.7	inbound	no
Figy	20	9	225-239	9.7	inbound	no
Figy	20	10	240-264	6.7	inbound	no
Figy	21	1	1-40	6.8	outbound	no
Figy	21	2	41-70	8.9	outbound	no
Figy	21	3	71-98	9	outbound	no
Figy	21	4	99-114	5.5	outbound	no
Figy	21	5	115-125	8.6	outbound	no
Figy	21	6	126-134	7.2	turning	no
Figy	21	7	135-159	7	inbound	no
Figy	21	8	160-183	8.9	inbound	no
Figy	21	9	184-204	13.3	inbound	no
Figy	21	10	205-227	12.2	inbound	no
Figy	23	1	1-42	6.4	outbound	no
Figy	23	2	43-75	7.9	outbound	no
Figy	23	3	76-104	9.2	outbound	no
Figy	23	4	105-126	10.2	outbound	no
Figy	23	5	127-139	9.6	outbound	no
Figy	23	6	140-163	2.58	turning	no
Figy	23	7	164-184	5.7	inbound	no
Figy	23	8	185-208	9.5	inbound	no
Figy	23	9	209-244	7.6	inbound	no
Figy	23	10	245-269	9.9	inbound	no
Hurvinek	3	1	1-7	6.7	outbound	no
Hurvinek	3	2	8-14	5.7	outbound	no
Hurvinek	3	3	15-19	10.9	outbound	no
Hurvinek	3	4	20-22	8.3	outbound	no
Hurvinek	3	5	23-30	5.5	outbound	no
Hurvinek	3	6	31-36	8.4	outbound	no
Hurvinek	3	7	37-43	5.6	turning	no
Hurvinek	3	8	44-48	10.1	inbound	no
Hurvinek	3	9	49-51	13.4	inbound	no
Hurvinek	3	10	52-54	8	inbound	no
Hurvinek	4	1	1-9	6.7	outbound	no
Hurvinek	4	2	10-14	5.7	outbound	no
Hurvinek	4	3	15-21	7.4	outbound	no
Hurvinek	4	4	22-24	11.2	outbound	no
Hurvinek	4	5	25-28	11.5	outbound	no
Hurvinek	4	6	29-35	7.4	outbound	no
Hurvinek	4	7	36-42	6.7	turning	no
Hurvinek	4	8	43-50	8.3	inbound	no
Hurvinek	4	9	51-57	7.3	inbound	no
Hurvinek	4	10	58-66	7.6	inbound	no
Hurvinek	6	1	1-4	7	outbound	no
Hurvinek	6	2	5-7	5	outbound	no
Hurvinek	6	3	8-9	7.4	outbound	no
Hurvinek	6	4	10-15	4.5	outbound	no
Hurvinek	6	5	16-18	5.9	outbound	no
Hurvinek	6	6	19-27	2.75	turning	no
Hurvinek	6	7	28-30	6.2	inbound	no
Hurvinek	6	8	31	6.6	inbound	no
Hurvinek	6	9	32-35	5.7	inbound	no
Hurvinek	6	10	36-41	6.6	inbound	no
Hurvinek	9	1	1-2	9.5	outbound	no
Hurvinek	9	2	3-4	10.7	outbound	no
Hurvinek	9	3	5-9	2.4	outbound	no
Hurvinek	9	4	10-13	3.51	outbound	no
Hurvinek	9	5	14-19	4.5	outbound	no
Hurvinek	9	6	20-22	5.5	turning	yes
Hurvinek	9	7	23-25	4.5	inbound	no
Hurvinek	9	8	26	5.7	inbound	no
Hurvinek	9	9	27-28	8.8	inbound	no
Hurvinek	9	10	29-36	4.4	inbound	no
Hurvinek	10	1	1-4	5.6	outbound	no
Hurvinek	10	2	5-8	5.4	outbound	no
Hurvinek	10	3	9-11	5.4	outbound	no
Hurvinek	10	4	12-13	8.5	outbound	no
Hurvinek	10	5	14-15	4.8	outbound	no
Hurvinek	10	6	16-18	5.5	turning	yes
Hurvinek	10	7	19-20	8.2	inbound	no
Hurvinek	10	8	21-22	8.1	inbound	no
Hurvinek	10	9	23	7.4	inbound	no
Hurvinek	10	10	24-27	6.8	inbound	no
Hurvinek	11	1	1-7	8.5	outbound	no
Hurvinek	11	2	8-11	10.8	outbound	no
Hurvinek	11	3	12-15	10.6	outbound	no
Hurvinek	11	4	16-22	8.4	outbound	no
Hurvinek	11	5	23-28	9.5	outbound	no
Hurvinek	11	6	29-37	9.9	outbound	no
Hurvinek	11	7	38-42	7.5	turning	yes
Hurvinek	11	8	43-52	7.2	inbound	no
Hurvinek	11	9	53-62	7.6	inbound	no
Hurvinek	11	10	63-74	7.9	inbound	no
Hurvinek	12	1	1-7	6.6	outbound	no
Hurvinek	12	2	8-10	7.8	outbound	no
Hurvinek	12	3	11-13	14.2	outbound	no
Hurvinek	12	4	14-17	12	outbound	no
Hurvinek	12	5	18-22	8.1	outbound	no
Hurvinek	12	6	23-25	8.3	outbound	no
Hurvinek	12	7	26-30	7	outbound	no
Hurvinek	12	8	31-32	5.8	turning	no
Hurvinek	12	9	33-37	6.8	inbound	no
Hurvinek	12	10	38-43	6.7	inbound	no
Hurvinek	13	1	1-4	8.1	outbound	no
Hurvinek	13	2	5-10	8.8	outbound	no
Hurvinek	13	3	11-14	6.1	outbound	no
Hurvinek	13	4	15-21	5.4	turning	no
Hurvinek	13	5	22-25	8.2	inbound	no
Hurvinek	13	6	26-29	10.9	inbound	no
Hurvinek	13	7	30-37	4.9	inbound	no
Hurvinek	13	8	38-43	5.3	inbound	no
Hurvinek	13	9	44-47	8.4	inbound	no
Hurvinek	13	10	48-53	5.9	inbound	no
Hurvinek	14	1	1-8	7.5	outbound	no
Hurvinek	14	2	9-21	4.8	outbound	no
Hurvinek	14	3	22-31	5.2	outbound	no
Hurvinek	14	4	32-50	3.45	outbound	no
Hurvinek	14	5	51-62	5.5	outbound	no
Hurvinek	14	6	63-74	5.7	outbound	no
Hurvinek	14	7	75-89	5.3	turning	no
Hurvinek	14	8	90-97	6.2	inbound	no
Hurvinek	14	9	98-105	8.5	inbound	no
Hurvinek	14	10	106-119	4.3	inbound	no
Hurvinek	15	1	1-31	4.6	outbound	no
Hurvinek	15	2	32-54	7.6	outbound	no
Hurvinek	15	3	55-71	8.3	outbound	no
Hurvinek	15	4	72-84	9.3	outbound	no
Hurvinek	15	5	73-116	5.8	turning	no
Hurvinek	15	6	117-136	8.2	inbound	no
Hurvinek	15	7	137-163	6.3	inbound	no
Hurvinek	15	8	164-182	8	inbound	no
Hurvinek	15	9	183-218	4.4	inbound	no
Hurvinek	15	10	219-252	5.3	inbound	no
Hurvinek	16	1	1-17	5	outbound	no
Hurvinek	16	2	18-31	5.1	outbound	no
Hurvinek	16	3	32-41	6	outbound	no
Hurvinek	16	4	42-54	6	outbound	no
Hurvinek	16	5	55-64	7.7	outbound	no
Hurvinek	16	6	65-75	7	outbound	no
Hurvinek	16	7	76-85	6.9	turning	no
Hurvinek	16	8	86-94	7.9	inbound	no
Hurvinek	16	9	95-104	7.6	inbound	no
Hurvinek	16	10	105-111	5.9	inbound	no
Hurvinek	17	1	1-5	9.9	outbound	no
Hurvinek	17	2	6-11	8.1	outbound	no
Hurvinek	17	3	12-15	7.1	outbound	no
Hurvinek	17	4	16-21	10.6	outbound	no
Hurvinek	17	5	22-24	8.6	outbound	no
Hurvinek	17	6	25-29	6.5	turning	no
Hurvinek	17	7	30-34	8.7	inbound	no
Hurvinek	17	8	35-38	13.4	inbound	no
Hurvinek	17	9	39-42	11.3	inbound	no
Hurvinek	17	10	43-49	11.3	inbound	no
Hurvinek	18	1	1-3	10.6	outbound	no
Hurvinek	18	2	4-7	8.7	outbound	no
Hurvinek	18	3	8-10	10.8	outbound	no
Hurvinek	18	4	11-13	11.2	outbound	no
Hurvinek	18	5	14-16	8.3	turning	no
Hurvinek	18	6	17-18	12.4	inbound	no
Hurvinek	18	7	19-21	10.2	inbound	no
Hurvinek	18	8	22-23	9.5	inbound	no
Hurvinek	18	9	24-26	14.3	inbound	no
Hurvinek	18	10	27-29	17.9	inbound	no
Hurvinek	19	1	1-2	5.9	outbound	no
Hurvinek	19	2	3-5	5	outbound	no
Hurvinek	19	3	6-7	9	outbound	no
Hurvinek	19	4	8-10	9.1	outbound	no
Hurvinek	19	5	11-12	4.8	turning	no
Hurvinek	19	6	13	10.8	inbound	no
Hurvinek	19	7	14-15	10.1	inbound	no
Hurvinek	19	8	16-17	9.7	inbound	no
Hurvinek	19	9	18-19	4.4	inbound	no
Hurvinek	19	10	20-21	11.2	inbound	no
Hurvinek	21	1	1-5	8.3	outbound	no
Hurvinek	21	2	6-11	9.1	outbound	no
Hurvinek	21	3	12-16	8.4	outbound	no
Hurvinek	21	4	17-23	7.8	outbound	no
Hurvinek	21	5	24-26	10.7	outbound	no
Hurvinek	21	6	27-33	8.3	turning	no
Hurvinek	21	7	34-37	11	inbound	no
Hurvinek	21	8	38-43	10.4	inbound	no
Hurvinek	21	9	44-48	9.1	inbound	no
Hurvinek	21	10	49-54	10.5	inbound	no
Hurvinek	22	1	1	8.8	outbound	no
Hurvinek	22	2	2-3	8.2	outbound	no
Hurvinek	22	3	4	13.6	outbound	no
Hurvinek	22	4	5-6	5.1	outbound	no
Hurvinek	22	5	7-9	4.4	turning	no
Hurvinek	22	6	10-11	5.4	inbound	no
Hurvinek	22	7	12-13	10.3	inbound	no
Hurvinek	22	8	14-16	6.3	inbound	no
Hurvinek	22	9	17-18	8.3	inbound	no
Hurvinek	22	10	19-20	8.3	inbound	no
Hurvinek	24	1	1-3	10.9	outbound	no
Hurvinek	24	2	4-6	13.1	outbound	no
Hurvinek	24	3	7-9	8	outbound	no
Hurvinek	24	4	10-13	11.6	outbound	no
Hurvinek	24	5	14-16	10.8	outbound	no
Hurvinek	24	6	17-20	10.5	outbound	no
Hurvinek	24	7	21-22	5.7	turning	no
Hurvinek	24	8	23-24	9.7	inbound	no
Hurvinek	24	9	25-27	11.7	inbound	no
Hurvinek	24	10	28-31	12.1	inbound	no
Hurvinek	25	1	1-5	6.6	outbound	no
Hurvinek	25	2	6-11	9.1	outbound	no
Hurvinek	25	3	12-17	7.9	outbound	no
Hurvinek	25	4	18-21	7.1	outbound	no
Hurvinek	25	5	22-28	6.6	outbound	no
Hurvinek	25	6	29-31	7.4	outbound	no
Hurvinek	25	7	32-37	6.2	turning	no
Hurvinek	25	8	38-41	11.6	inbound	no
Hurvinek	25	9	42-44	6.3	inbound	no
Hurvinek	25	10	45-50	11.1	inbound	no
Hurvinek	26	1	1-2	6.7	outbound	no
Hurvinek	26	2	3-5	7.2	outbound	no
Hurvinek	26	3	6-8	5.9	outbound	no
Hurvinek	26	4	9-11	7.7	outbound	no
Hurvinek	26	5	12-13	8.6	outbound	no
Hurvinek	26	6	14-17	5.5	turning	no
Hurvinek	26	7	18-19	7.5	inbound	no
Hurvinek	26	8	20-22	8.3	inbound	no
Hurvinek	26	9	23-24	8.9	inbound	no
Hurvinek	26	10	25-29	5.4	inbound	no
Hurvinek	27	1	1-7	6.7	outbound	no
Hurvinek	27	2	8-14	6.6	outbound	no
Hurvinek	27	3	15-18	10.8	outbound	no
Hurvinek	27	4	19-25	6.7	outbound	no
Hurvinek	27	5	26-32	7.1	outbound	no
Hurvinek	27	6	33-43	4	turning	no
Hurvinek	27	7	44-51	6.3	inbound	no
Hurvinek	27	8	52-56	9	inbound	no
Hurvinek	27	9	57-62	8.7	inbound	no
Hurvinek	27	10	63-68	9.5	inbound	no
Hurvinek	28	1	1-13	5.7	outbound	no
Hurvinek	28	2	14-20	8	outbound	no
Hurvinek	28	3	21-26	12.2	outbound	no
Hurvinek	28	4	27-39	5.6	outbound	no
Hurvinek	28	5	40-50	5.6	turning	no
Hurvinek	28	6	51-58	8.9	inbound	no
Hurvinek	28	7	59-63	13.1	inbound	no
Hurvinek	28	8	64-68	13.9	inbound	no
Hurvinek	28	9	69-75	11.3	inbound	no
Hurvinek	28	10	76-84	9.9	inbound	no
Hurvinek	29	1	1-6	5.3	outbound	no
Hurvinek	29	2	7-12	6	outbound	no
Hurvinek	29	3	13-16	7.5	outbound	no
Hurvinek	29	4	17-20	8.2	outbound	no
Hurvinek	29	5	21-24	8.1	outbound	no
Hurvinek	29	6	25-28	7.6	outbound	no
Hurvinek	29	7	29-36	3.9	turning	no
Hurvinek	29	8	37-42	4.4	inbound	no
Hurvinek	29	9	43-46	8.4	inbound	no
[truncated: 4,181 more rows]

## Sheet: List of dogs
Dog	Breed	Date of birth	Sex	Shoulder height (cm)	Owner
Albi	Dachshund Zwerg Rauhhaar	2006-04-06	M	23	Fuk
Amala	Dachshund Standard Kurzhaar	2009-11-06	F	24	Kne
Amalka	Dachshund Zwerg Rauhhaar	2013-02-07	F	20	Ben
Bay	Dachshund Standard Langhaar	2013-12-25	M	25	Spa
Benda	Dachshund Zwerg Rauhhaar	2016-03-17	F	20	Ben
Bessy	Fox Terrier Smooth	2010-05-25	F	37	Ada
Cecil	Dachshund Zwerg Rauhhaar	2013-05-23	M	23	Mot
Demi	Dachshund Zwerg Rauhhaar	2013-03-15	F	23	Jak
Dona	German Spaniel	2013-04-12	F	45	Bre
Figy	Dachshund Kaninchen Rauhhaar	2013-09-16	F	19	Ben
Gina	Dachshund Standard Langhaar	2016-01-04	F	24	Spa
Gofi	Fox Terrier Smooth	2015-05-26	F	37	Ada
Hard	Fox Terrier Smooth	2016-05-22	M	40.5	Ada
Hennessy	Borzoi	2014-03-06	M	89	Nov
Hugo	Dachshund Kaninchen Rauhhaar	2013-02-07	M	21	Fuk
Hurvinek	Dachshund Zwerg Rauhhaar	2011-01-24	M	23	Ben
Jeny	Dachshund Standard Rauhhaar	2014-10-25	F	23	Bre
Kacka	Dachshund Zwerg Rauhhaar	2013-06-10	F	20	Ben
Kara	Welsh Terrier	2014-04-30	F	36	Bre
Kuky	Dachshund Kaninchen Rauhhaar	2011-10-09	M	20.5	Ben
Pecka	Dachshund Zwerg Rauhhaar	2016-01-01	F	21	Ben
Punta	Dachshund Zwerg Rauhhaar	2015-05-31	M	23	Ben
Safira	Dachshund Standard Langhaar	2014-10-13	F	23	Spa
Sara	Alpine Dachsbracke	2013-03-06	F	39	Div
Terezka	Dachshund Zwerg Rauhhaar	2015-02-25	F	21	Ben
Upirek	Dachshund Kaninchen Rauhhaar	2016-02-25	M	20	Fuk
Vendulka	Dachshund Zwerg Rauhhaar	2007-03-25	F	22	Ben
